# Supplementary material for: Rational design of efficient photosensitizers based on cyclometalated iridium(iii) complexes with 2-arylbenzimidazole and aromatic 1,3-diketone ligands
Source: Royal Society of Chemistry journal article supplement (doi:10.1039/d3dt02789a), 2023-01-01
Supplement: d3dt02789a1.pdf [file d3dt02789a1.pdf]

## Supporting Information

### **Rational design of efficient photosensitizers based on cyclometalated iridium(III) complexes with 2-arylbenzimidazole and aromatic 1,3-diketone ligands**

Sergei V. Tatarin, Elisaveta A. Meshcheriakova, Sergey A. Kozyukhin, Victor V. Emets and Stanislav I. Bezzubov\*

1. Complexes studied in this work
2. NMR and mass spectra.
3. X-ray data.
4. Redox and optical properties
5. Computational details
6. Photovoltaic measurements

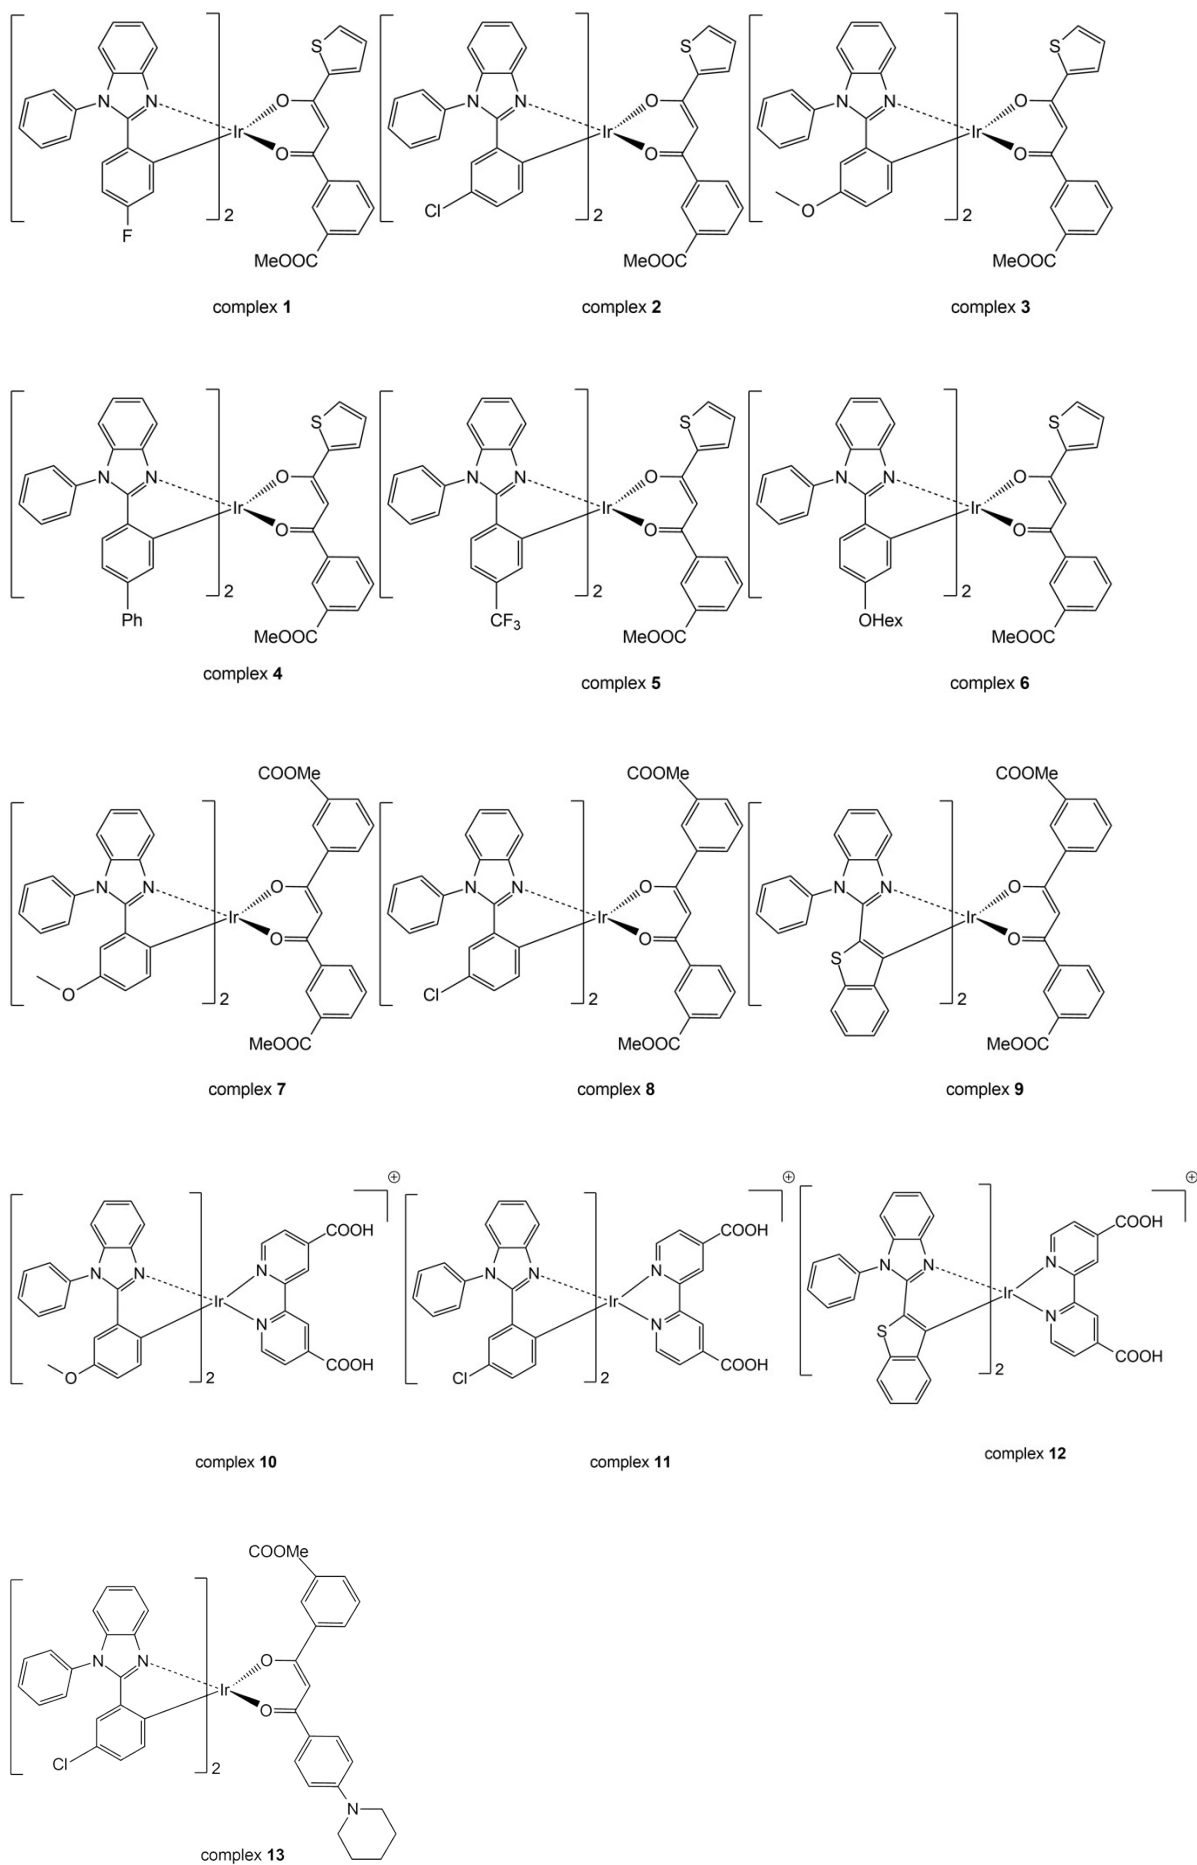

Figure S1. Synthesized complexes 1–13

# 1. NMR and mass spectra.

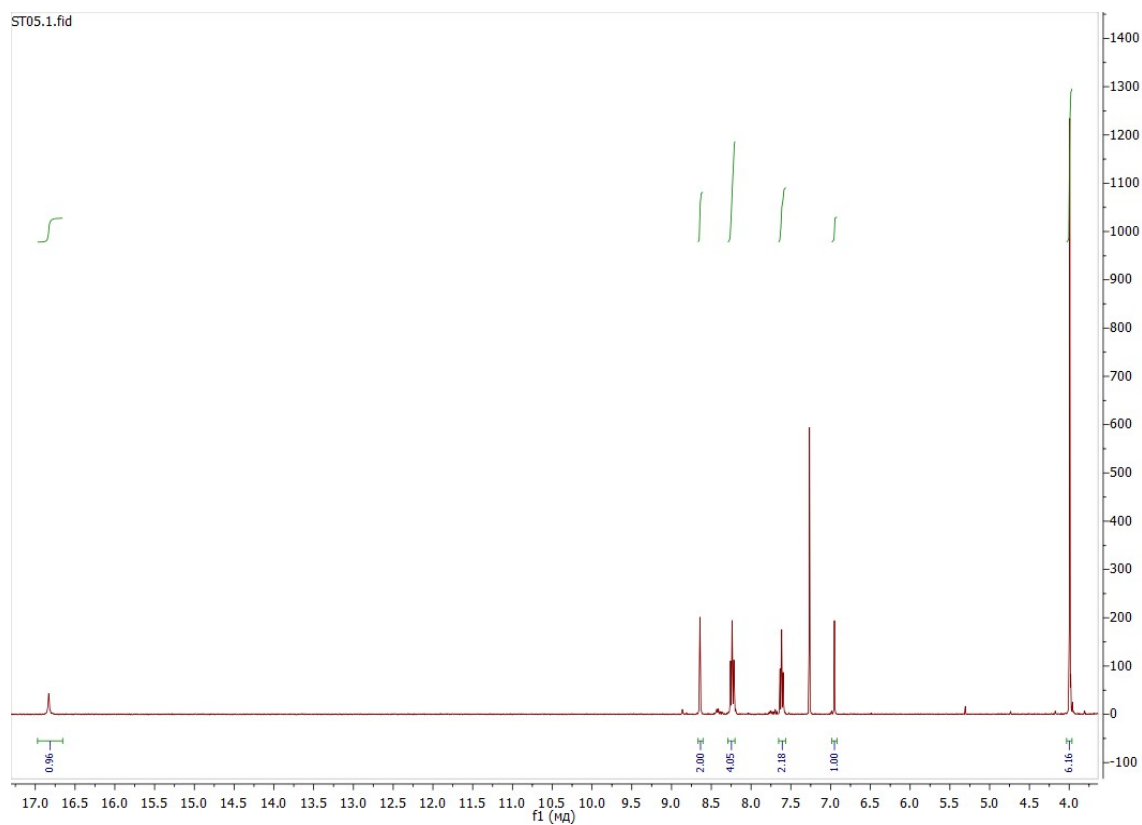

Figure S2.  $^1\text{H}$  NMR spectrum of  $\text{L}_2$  (400 MHz, 298K,  $\text{CDCl}_3$ ).

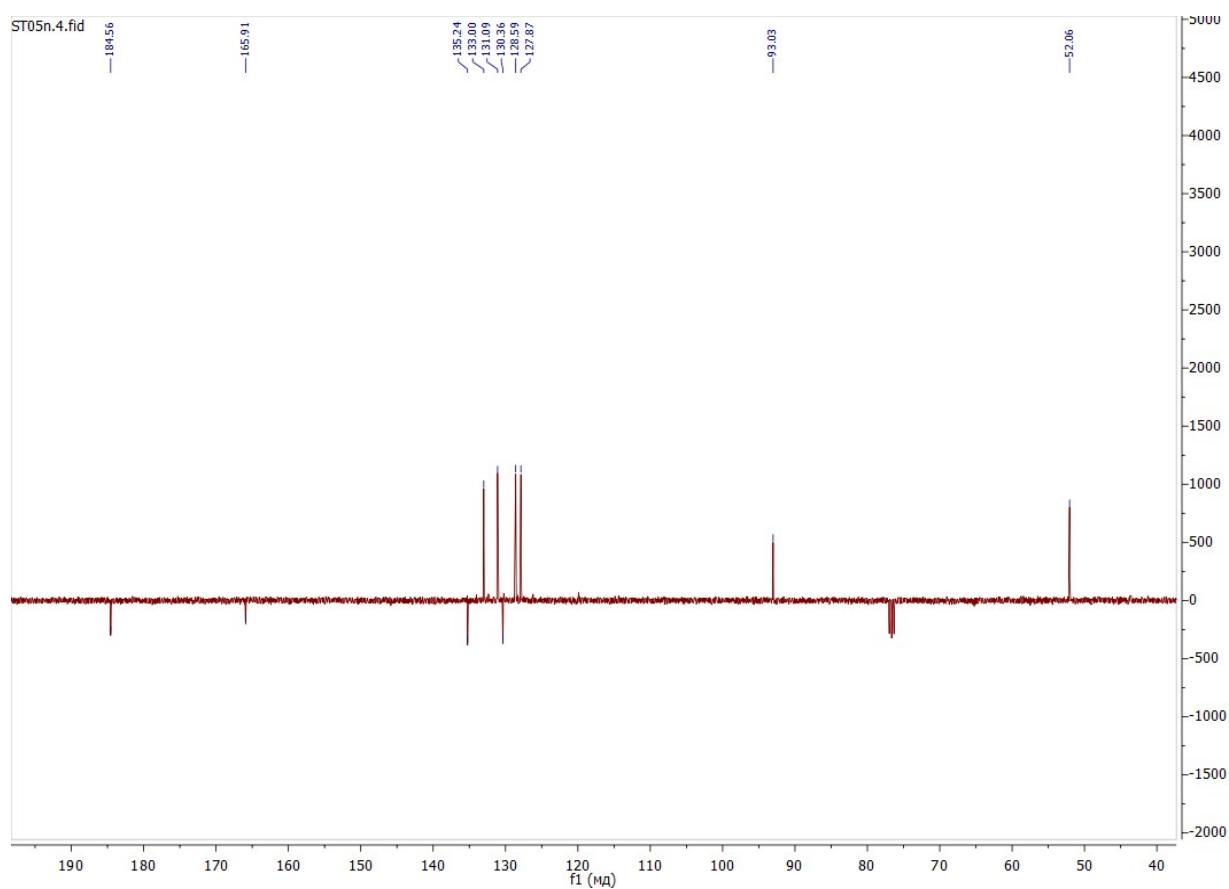

Figure S3.  $^{13}\text{C}\{^1\text{H}\}$  NMR spectrum (APT) of  $\text{L}_2$  (101 MHz, 298K,  $\text{CDCl}_3$ ).

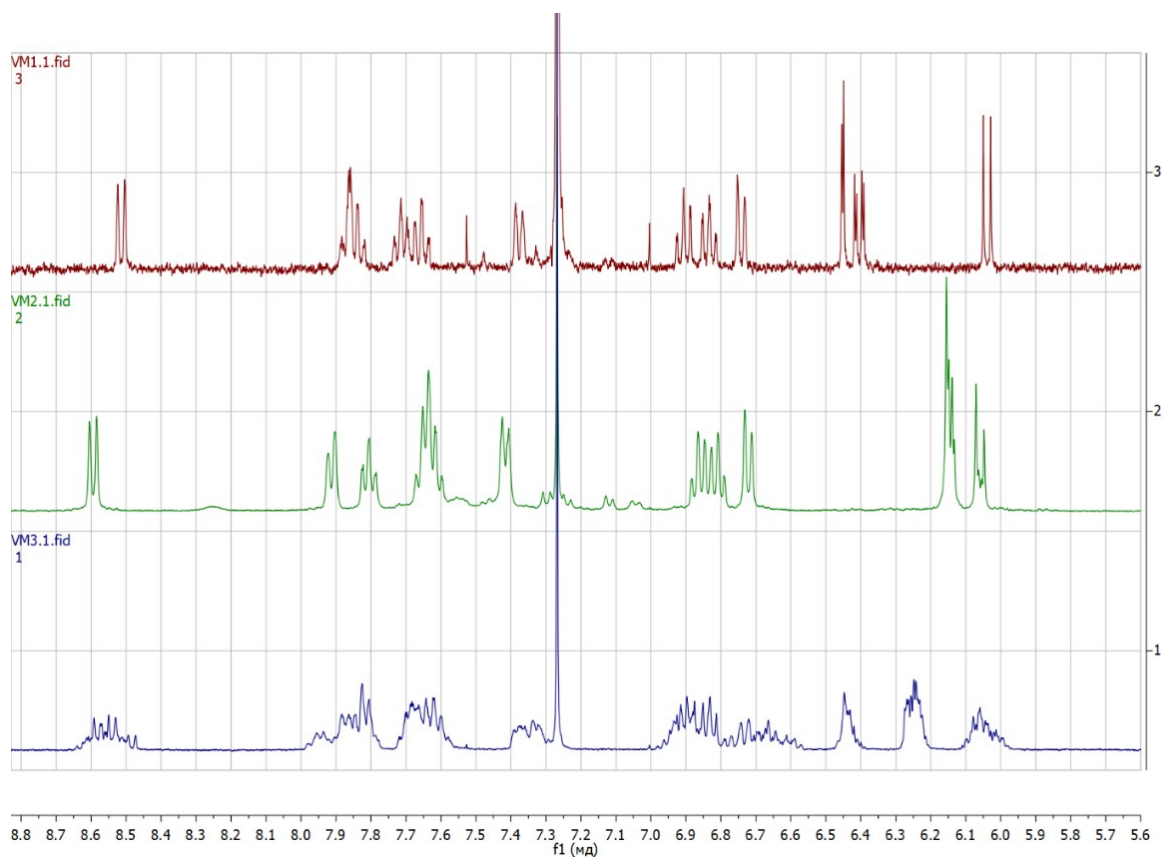

Fig.S4. <sup>1</sup>H NMR spectra of dimeric compounds with 3cbi (red), 3mbi (green) and 3fbi (blue) (400 MHz, 298K, CDCl<sub>3</sub>).

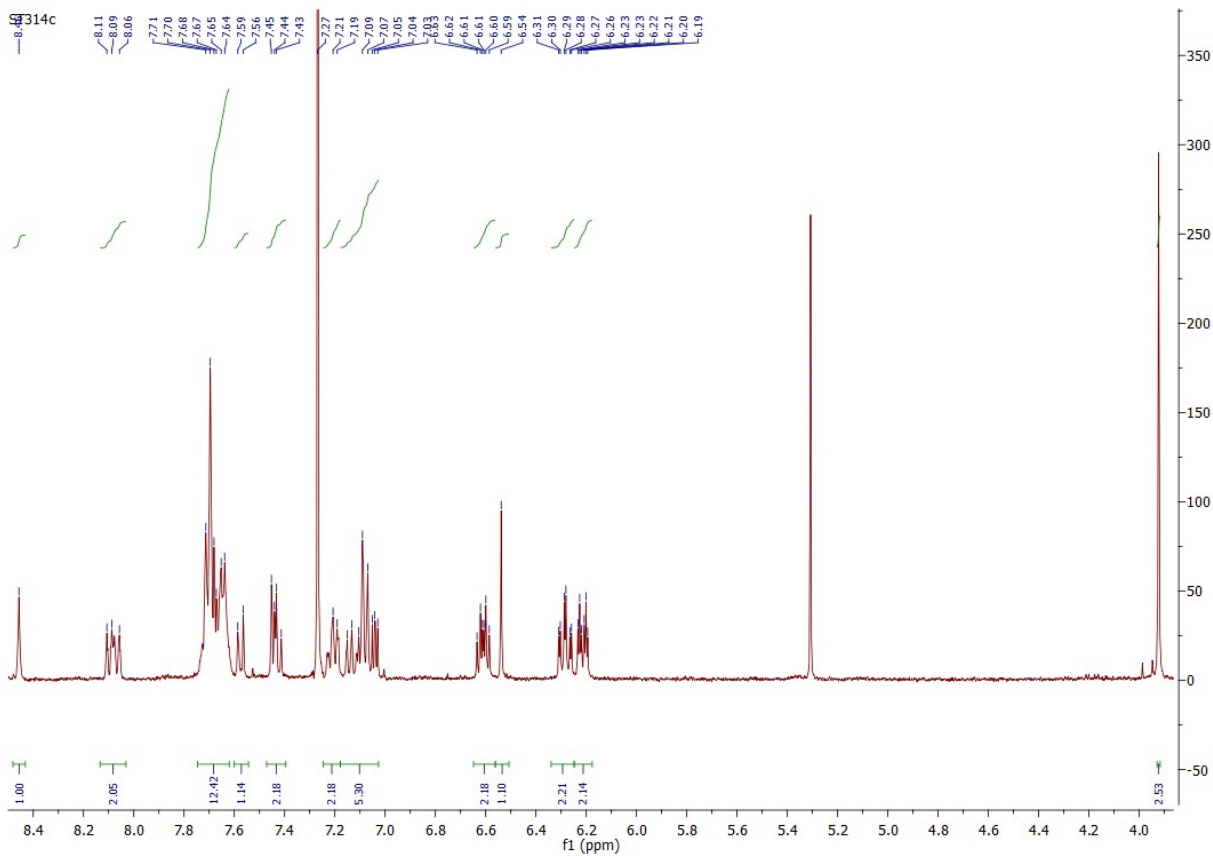

Figure S5. <sup>1</sup>H NMR spectrum of 1 (400 MHz, 298K, CDCl<sub>3</sub>).

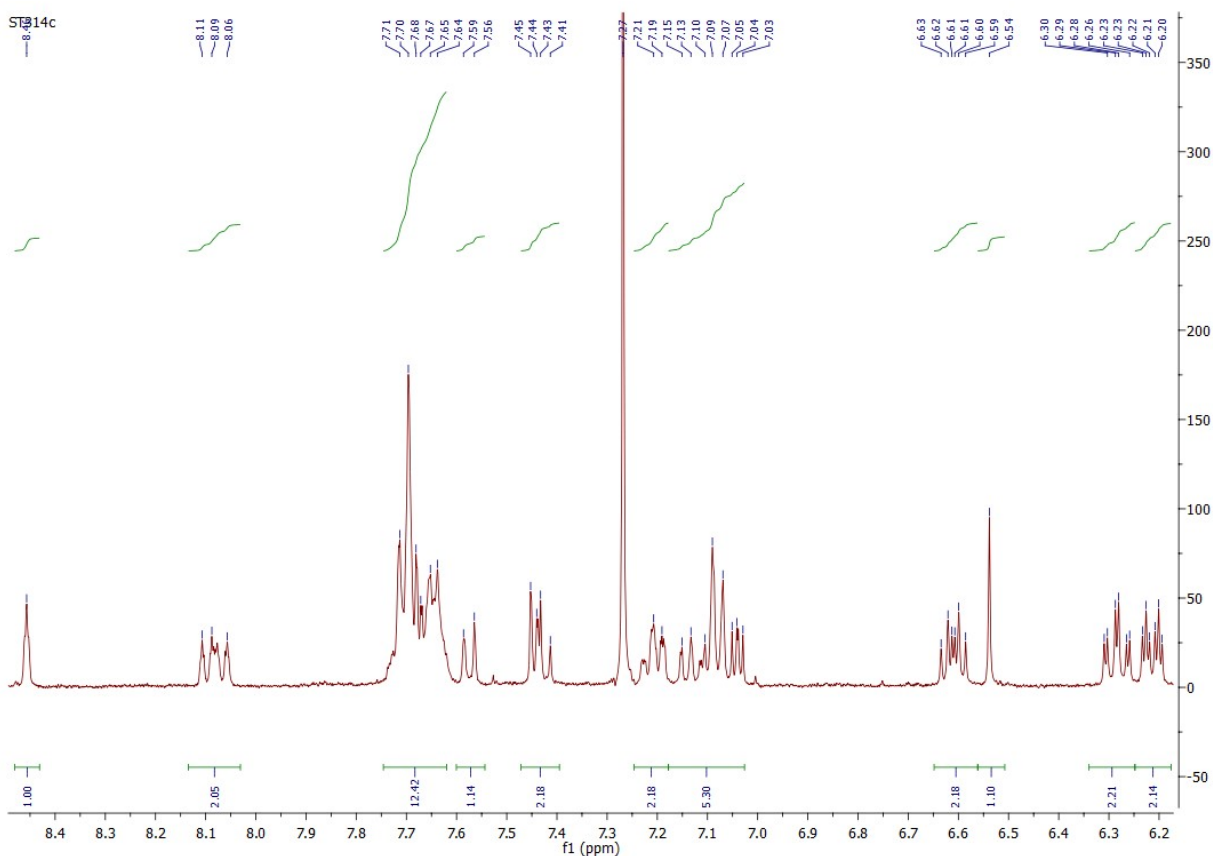

Figure S6. Aromatic region of  $^1\text{H}$  NMR spectrum of 1 (400 MHz, 298K,  $\text{CDCl}_3$ ).

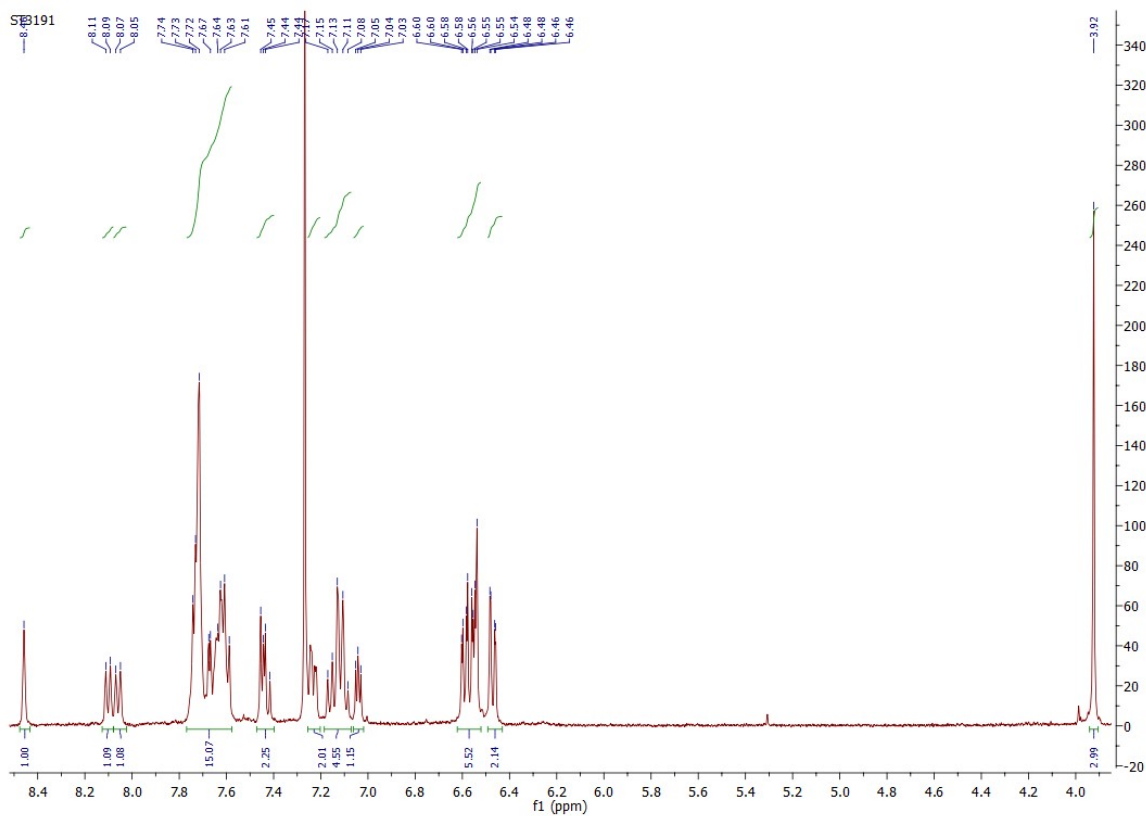

Figure S7.  $^1\text{H}$  NMR spectrum of 2 (400 MHz, 298K,  $\text{CDCl}_3$ ).

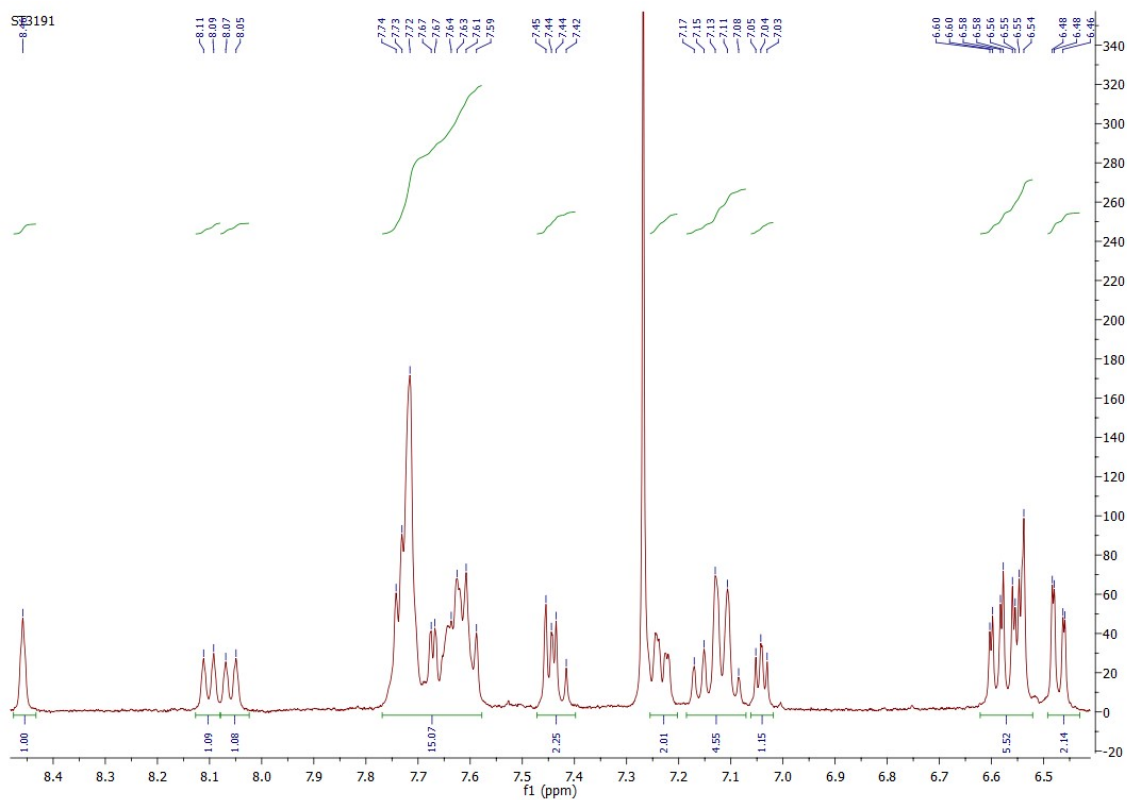

Figure S8. Aromatic region of  $^1\text{H}$  NMR spectrum of **2** (400 MHz, 298K,  $\text{CDCl}_3$ ).

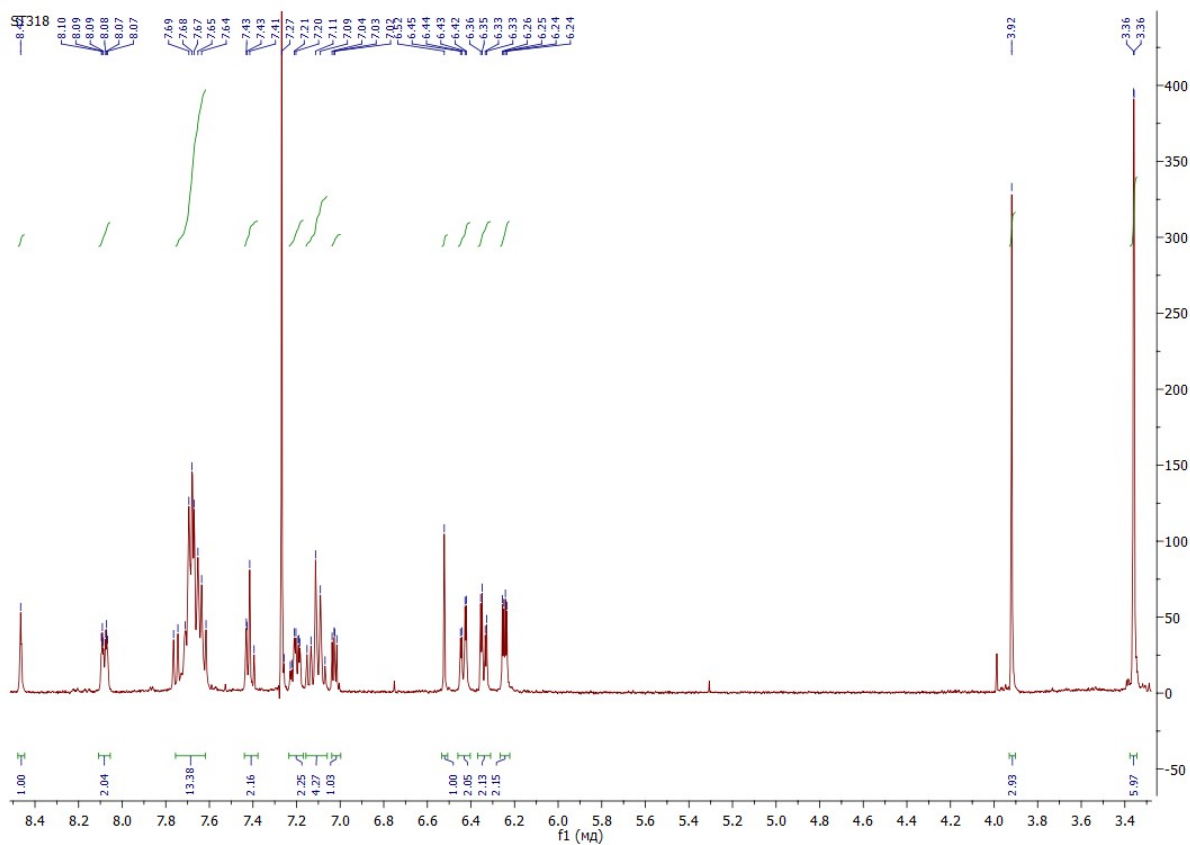

Figure S9.  $^1\text{H}$  NMR spectrum of **3** (400 MHz, 298K,  $\text{CDCl}_3$ ).

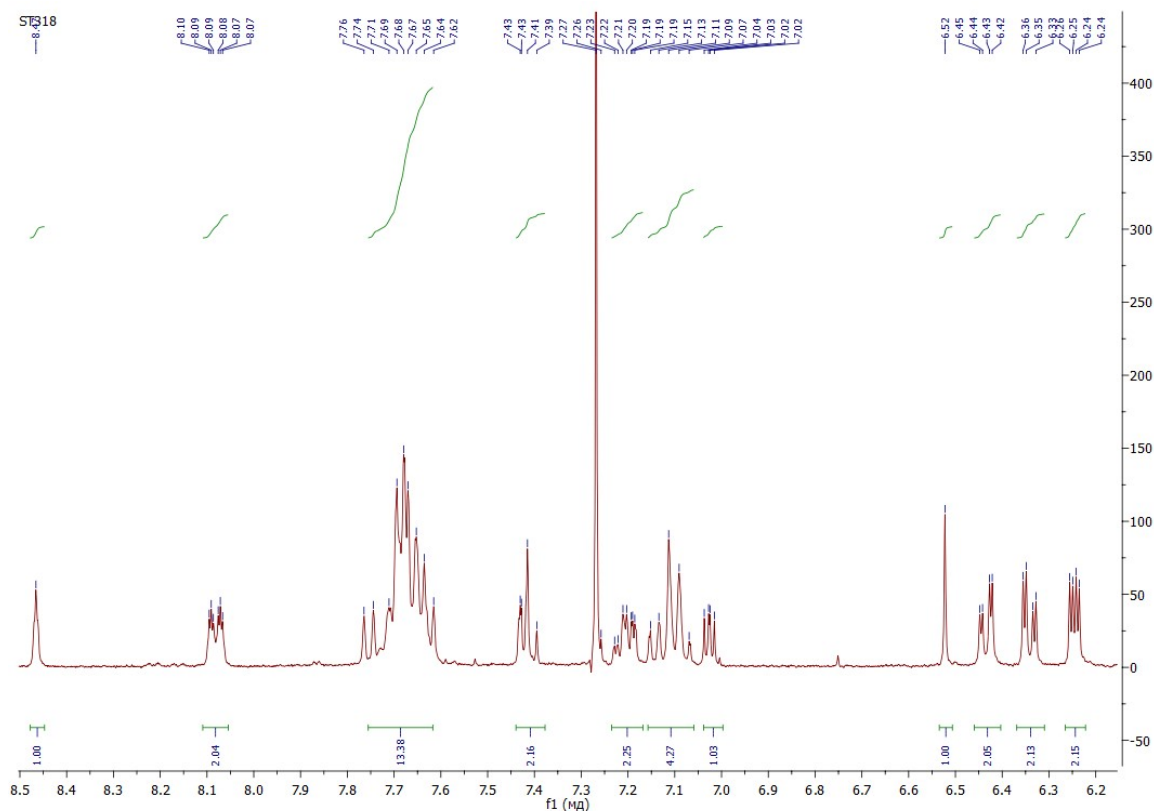

Figure S10. Aromatic region of  $^1\text{H}$  NMR spectrum of **3** (400 MHz, 298K,  $\text{CDCl}_3$ ).

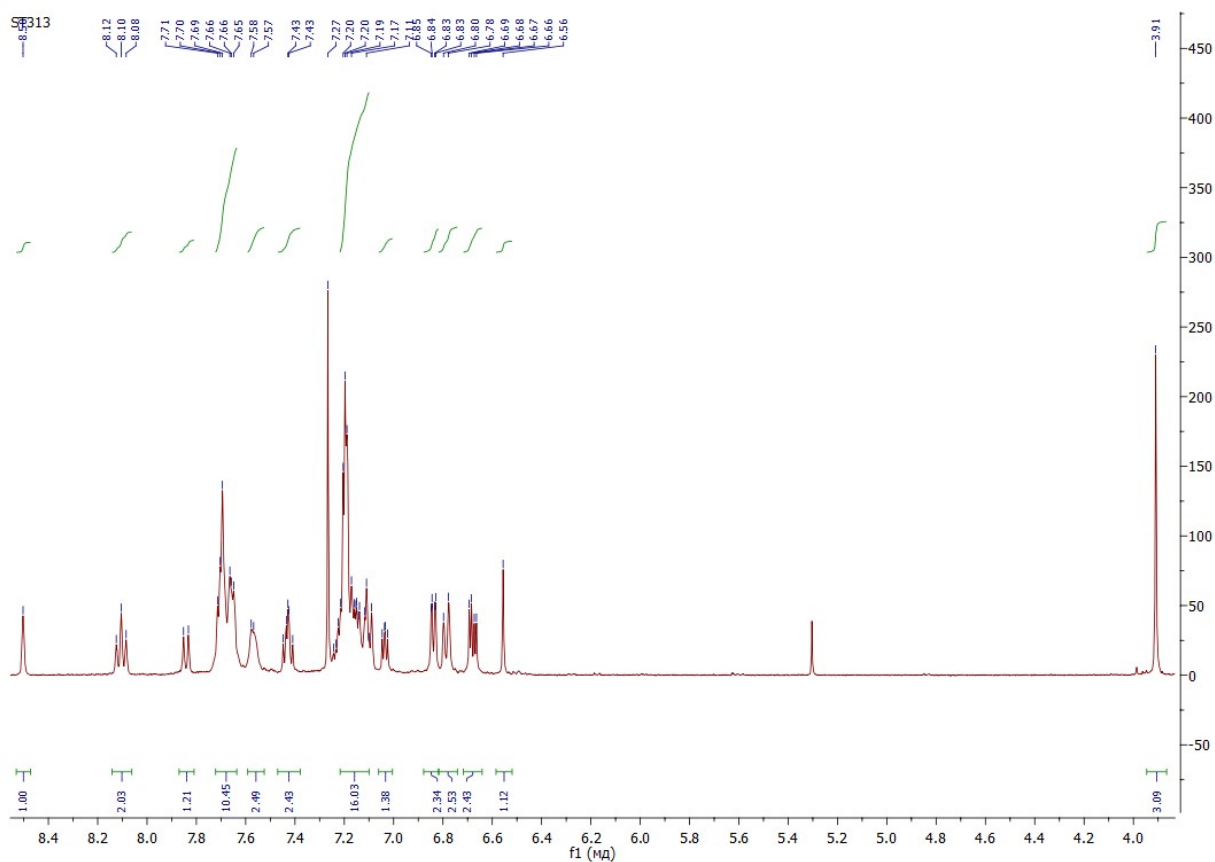

Figure S11.  $^1\text{H}$  NMR spectrum of **4** (400 MHz, 298K,  $\text{CDCl}_3$ ).

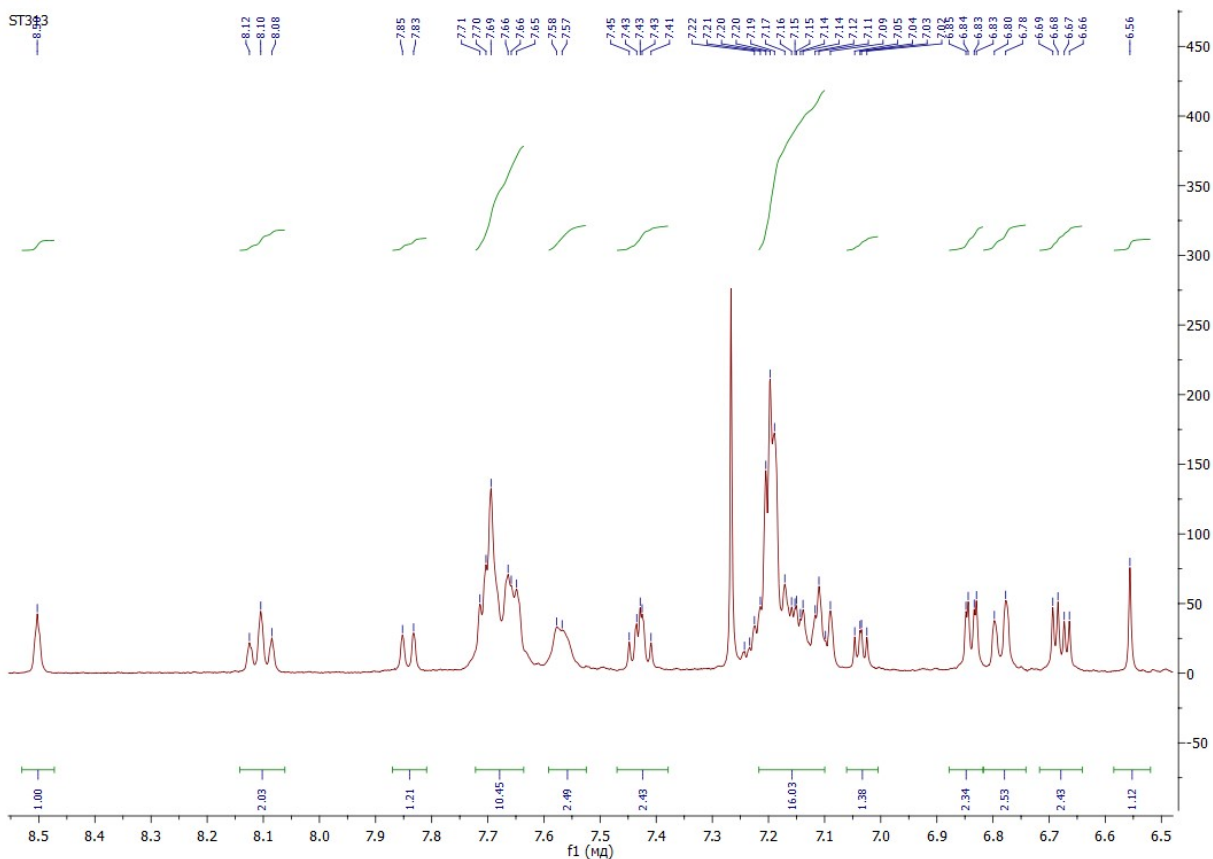

Figure S12. Aromatic region of  $^1\text{H}$  NMR spectrum of **4** (400 MHz, 298K,  $\text{CDCl}_3$ ).

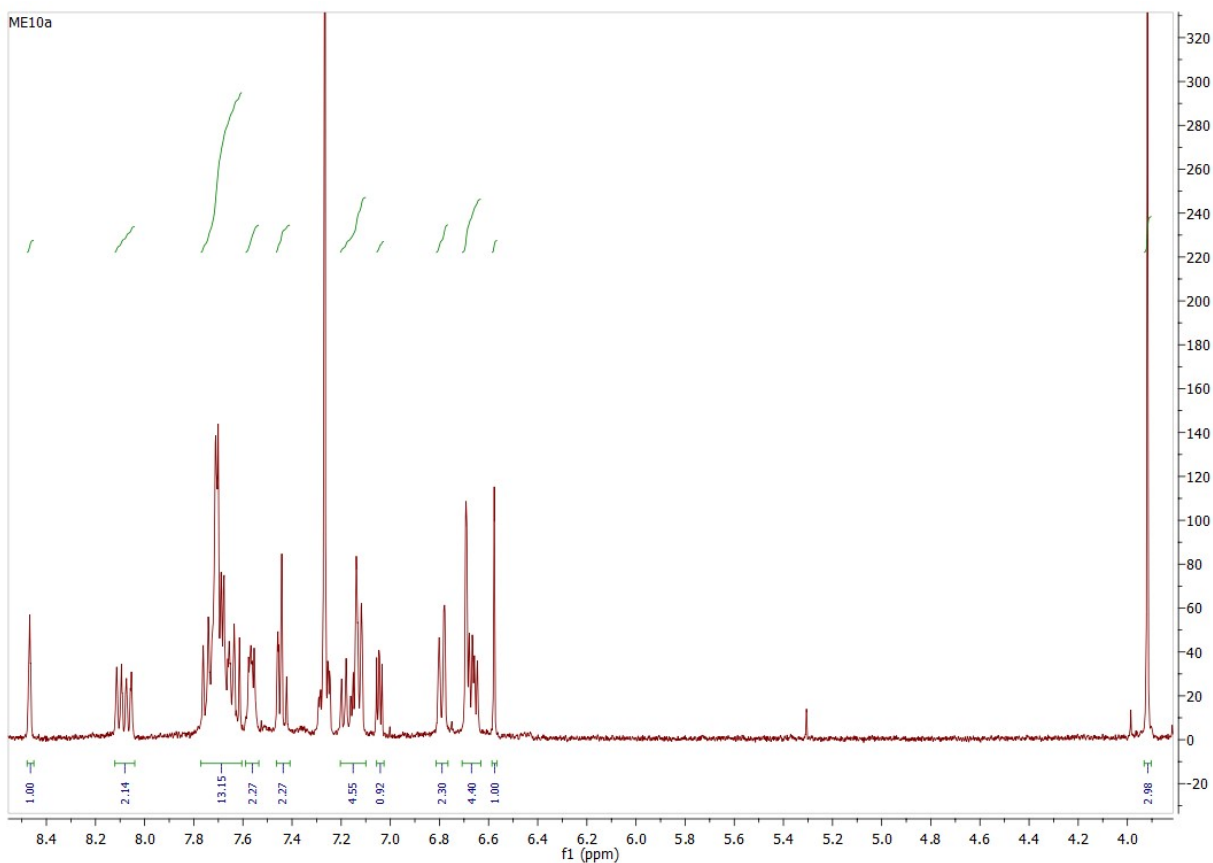

Figure S13.  $^1\text{H}$  NMR spectrum of **5** (400 MHz, 298K,  $\text{CDCl}_3$ ).



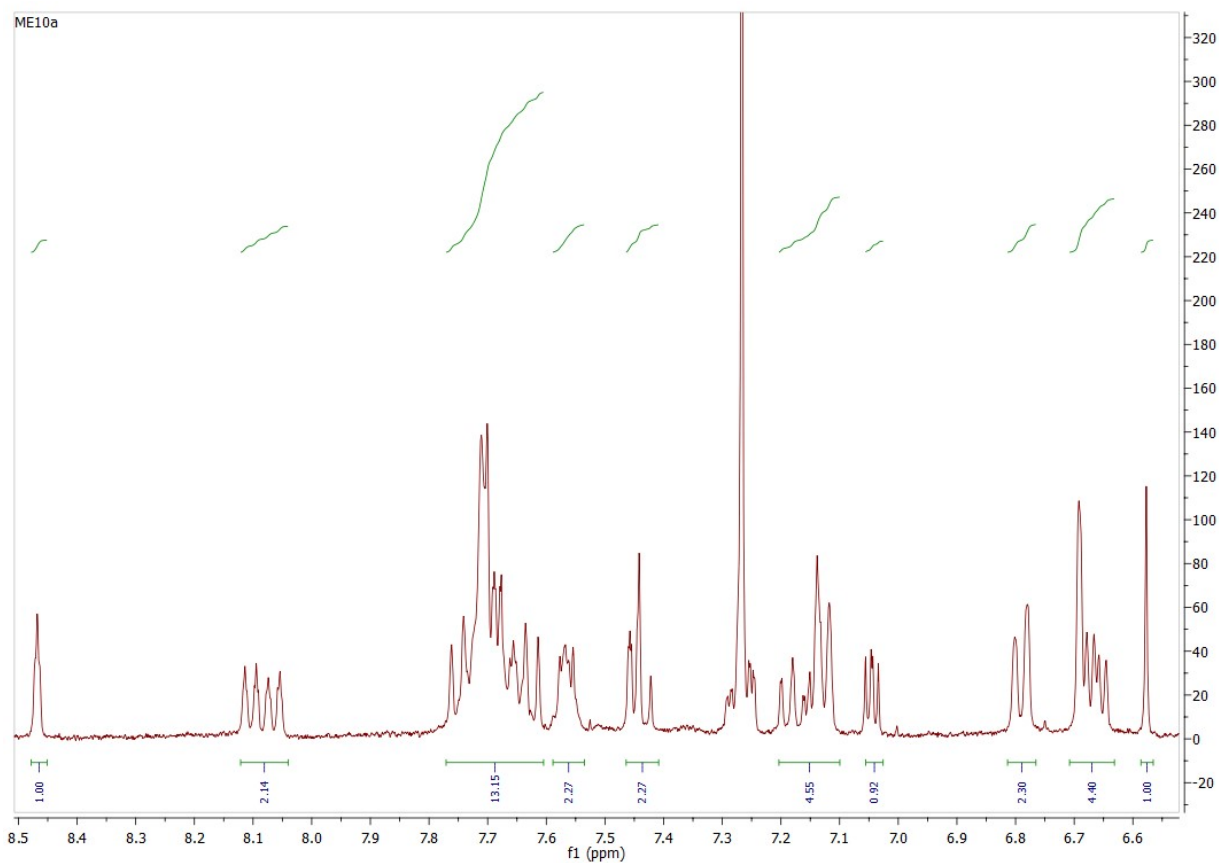

Figure S14. Aromatic region of  $^1\text{H}$  NMR spectrum of **5** (400 MHz, 298K,  $\text{CDCl}_3$ ).

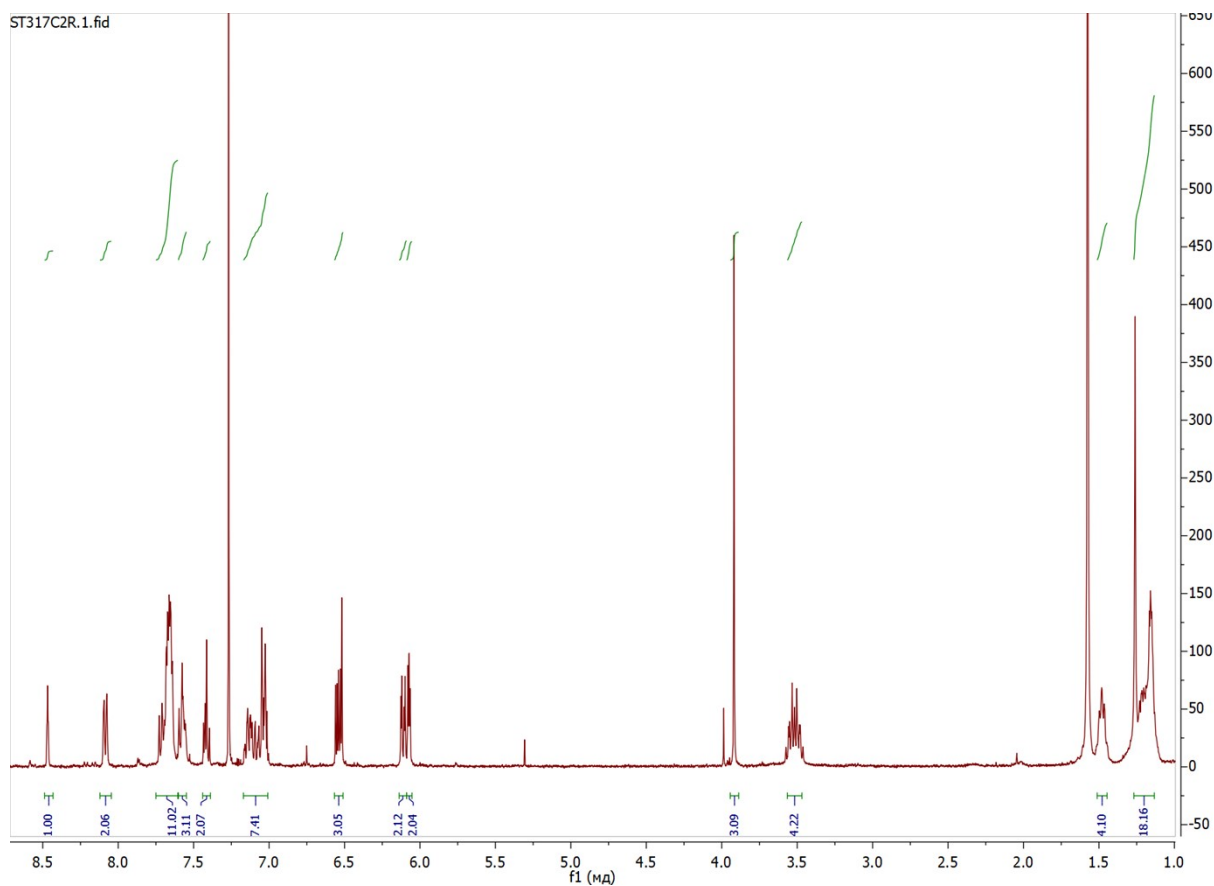

Figure S15.  $^1\text{H}$  NMR spectrum of **6** (400 MHz, 298K,  $\text{CDCl}_3$ ).

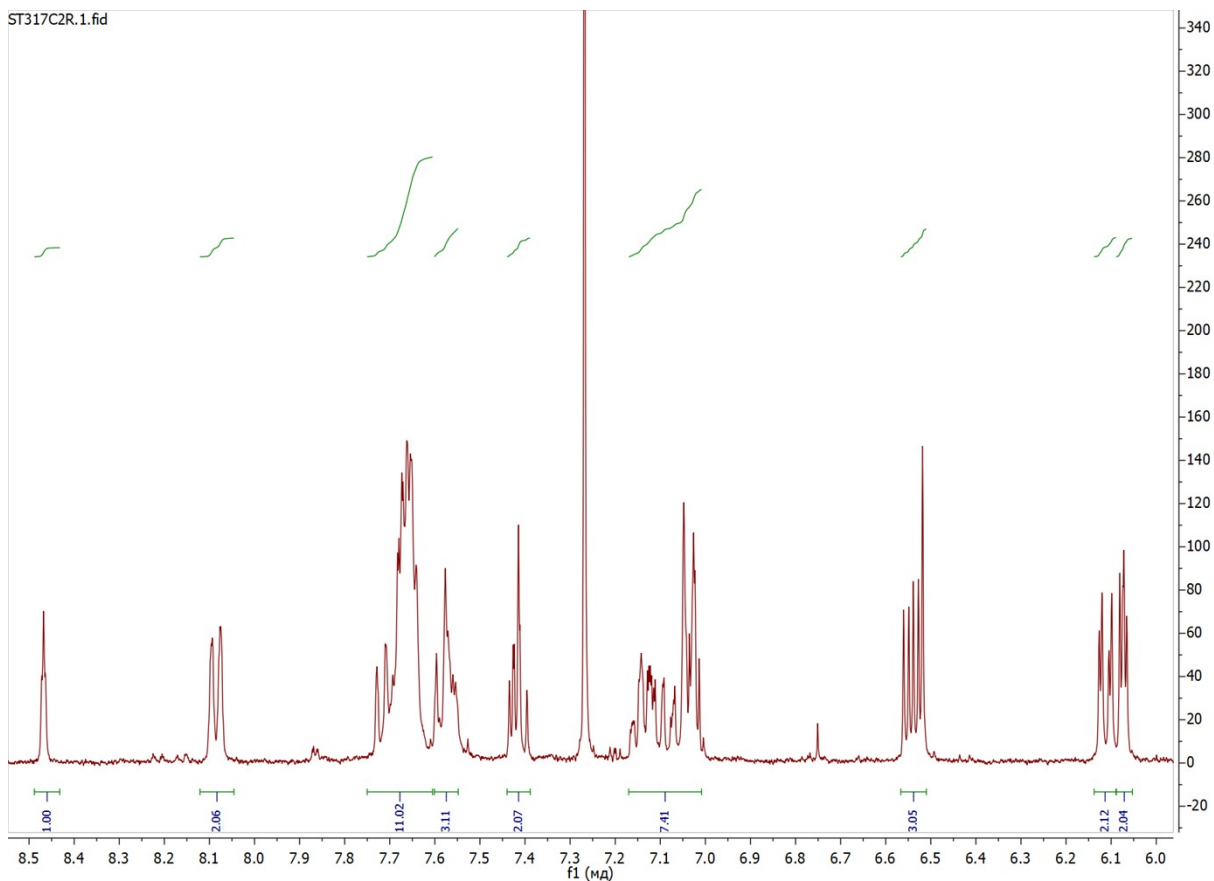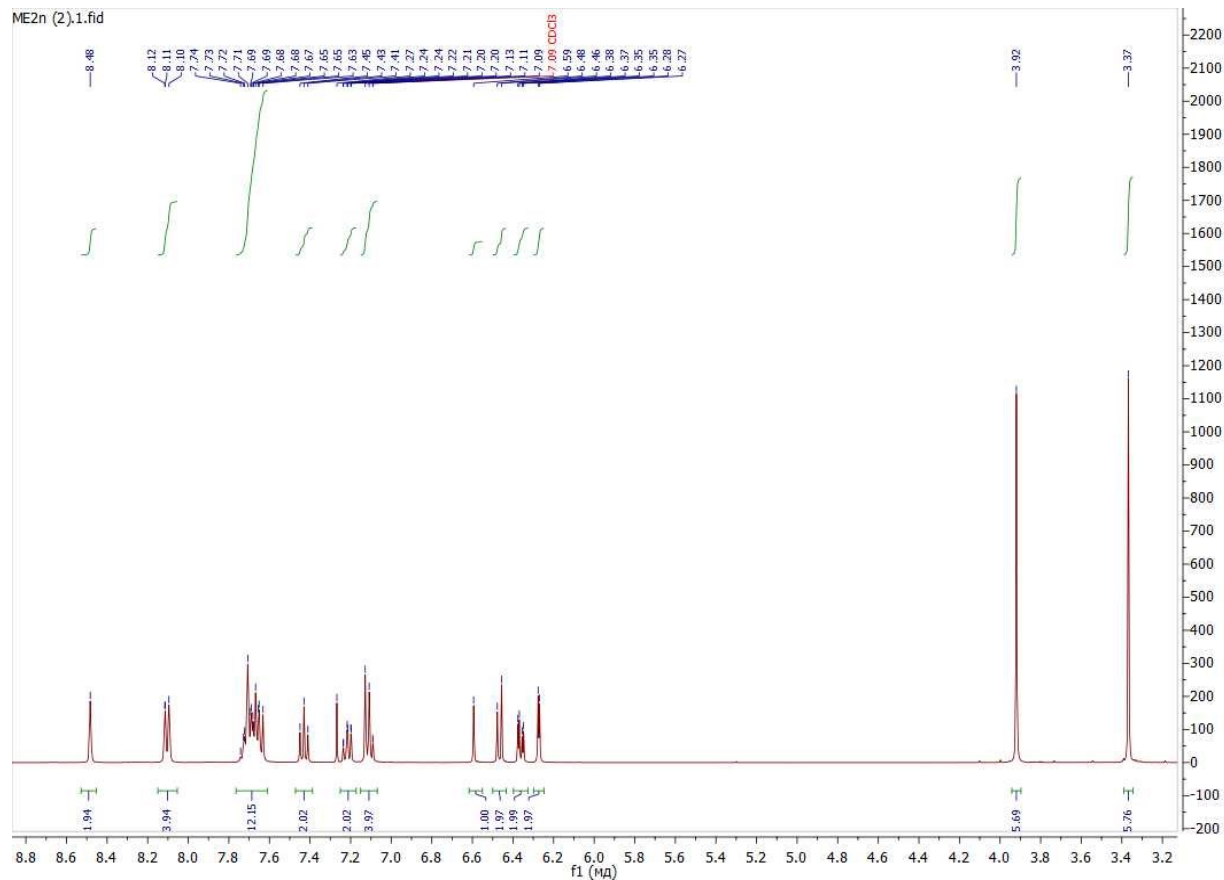

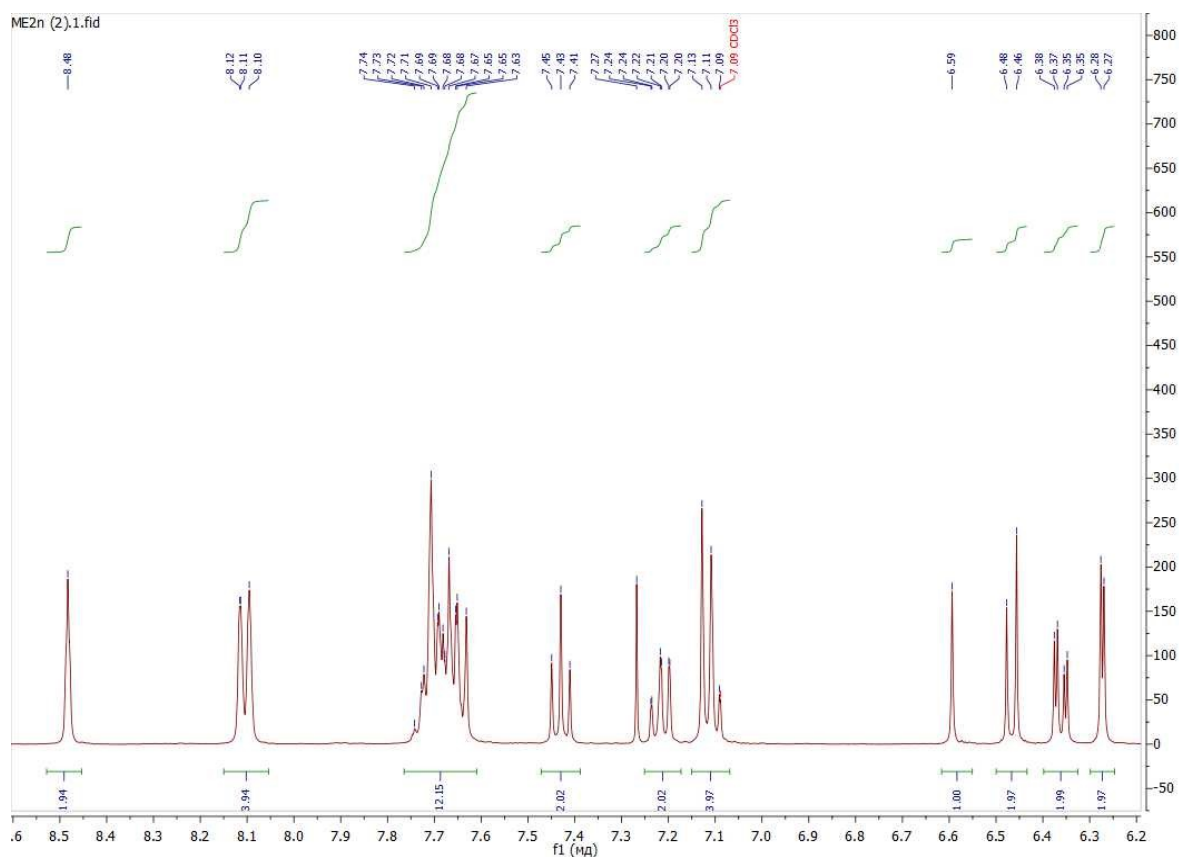

Figure S18. Aromatic region of <sup>1</sup>H NMR spectrum of **7** (400 MHz, 298K, CDCl<sub>3</sub>).

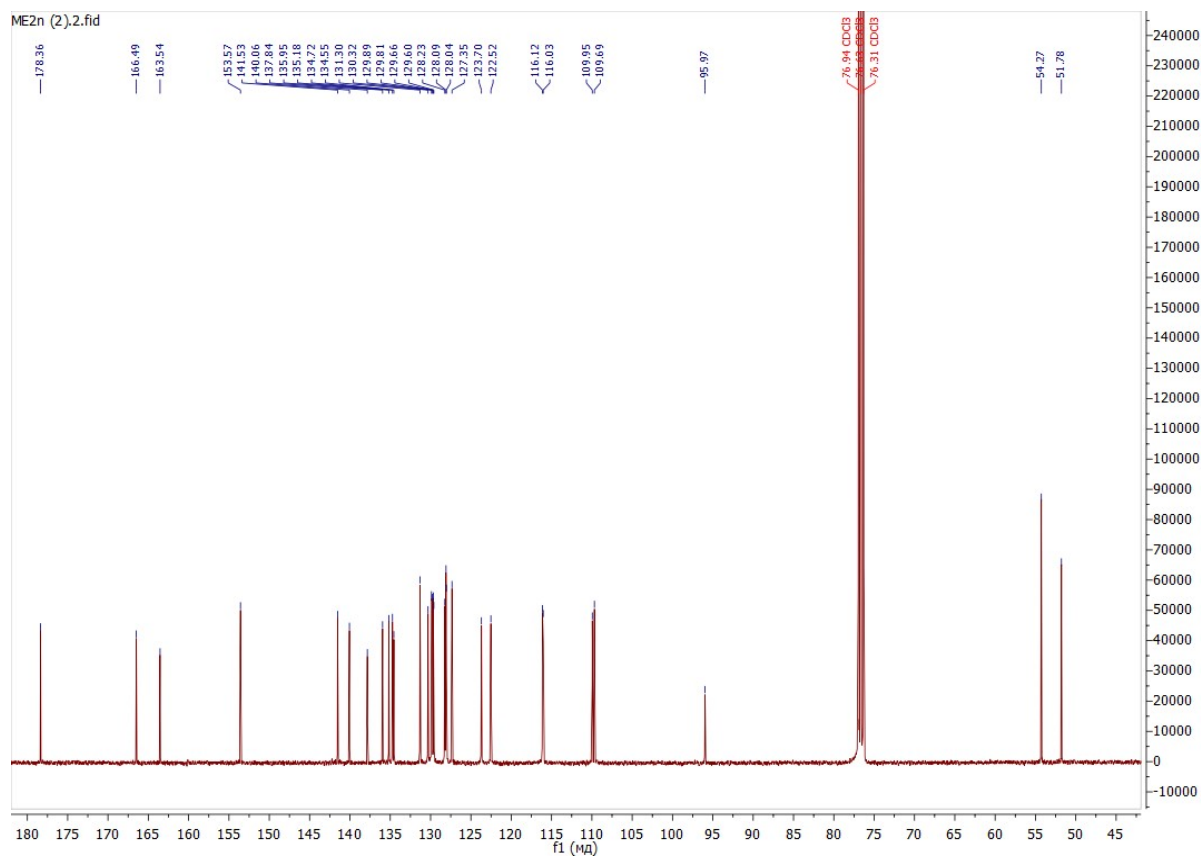

Figure S19. <sup>13</sup>C {<sup>1</sup>H} NMR spectrum of **7** (101 MHz, 298K, CDCl<sub>3</sub>).

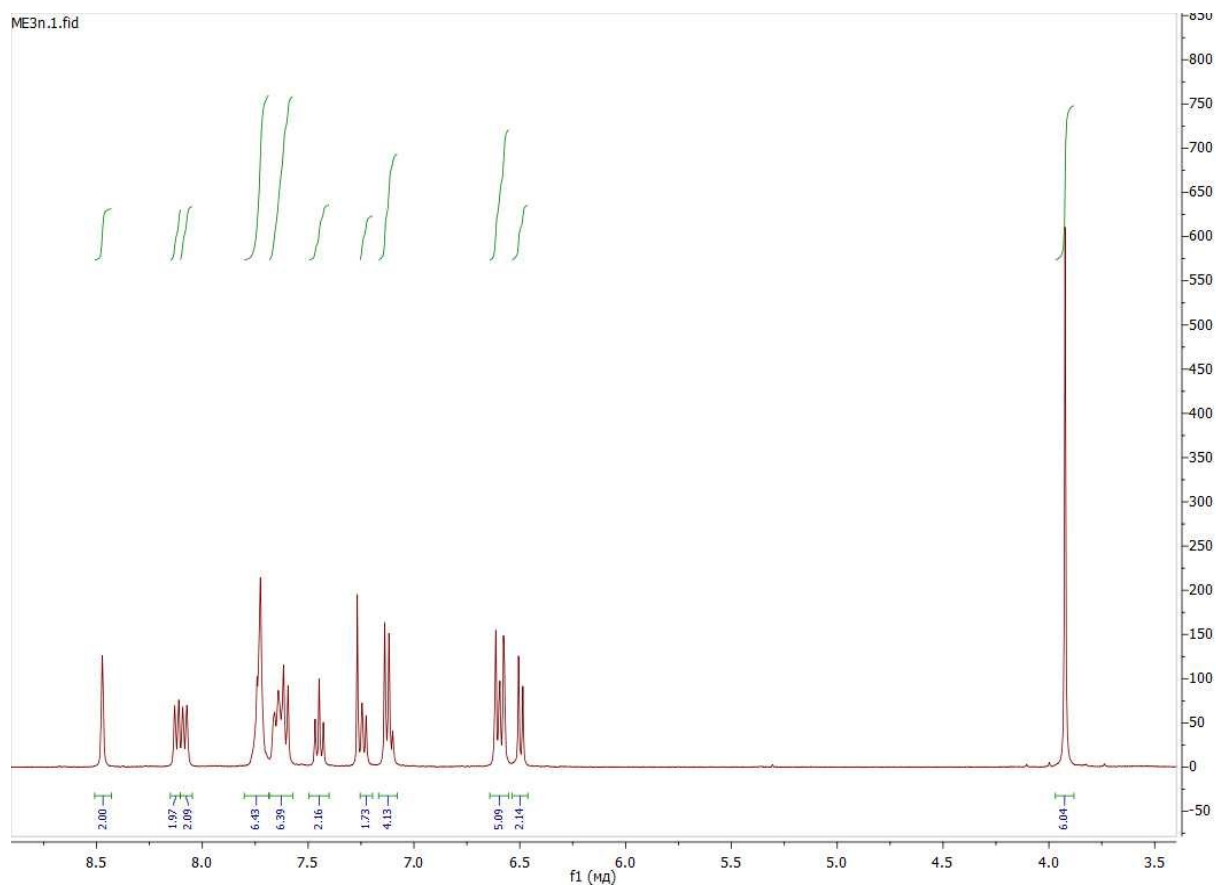

Figure S20.  $^1\text{H}$  NMR spectrum of **8** (400 MHz, 298K,  $\text{CDCl}_3$ ).

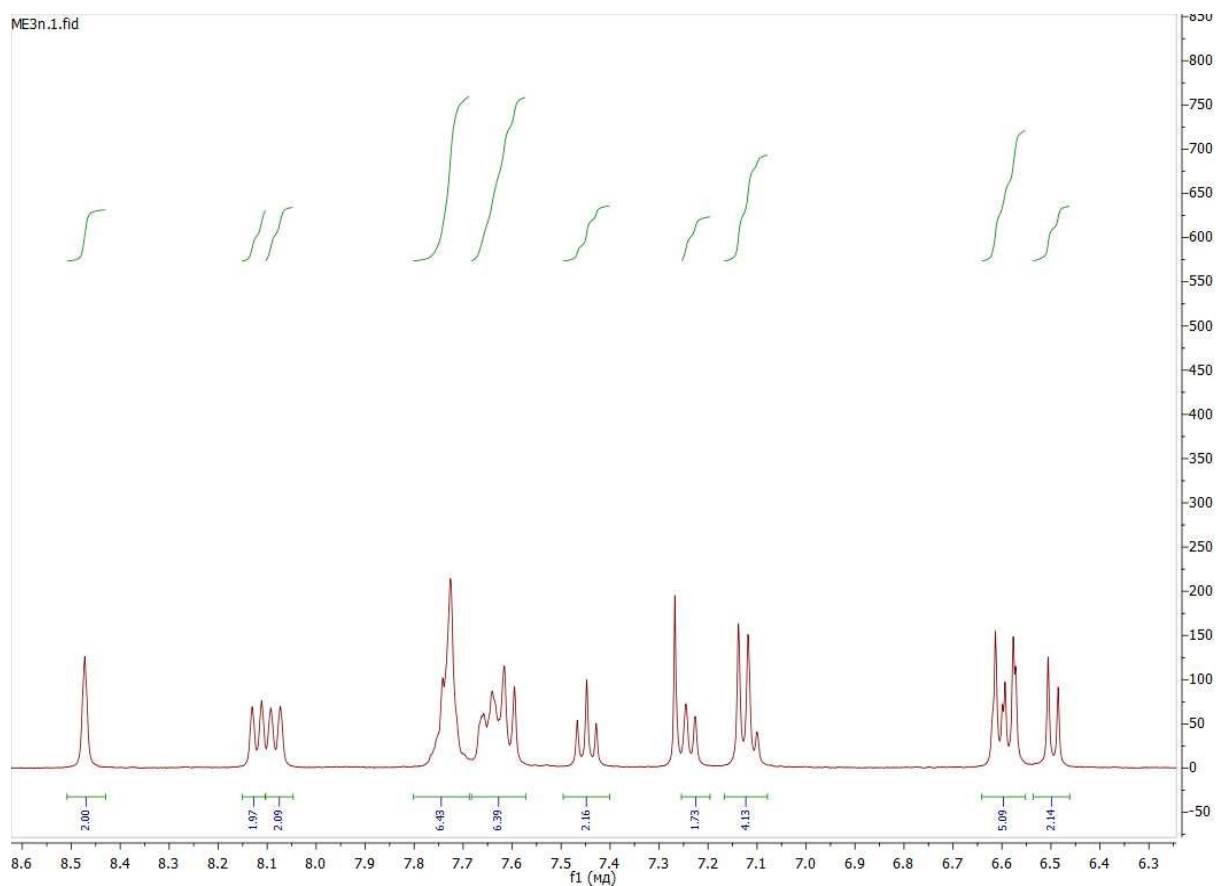

Figure S21. Aromatic region of  $^1\text{H}$  NMR spectrum of **8** (400 MHz, 298K,  $\text{CDCl}_3$ ).

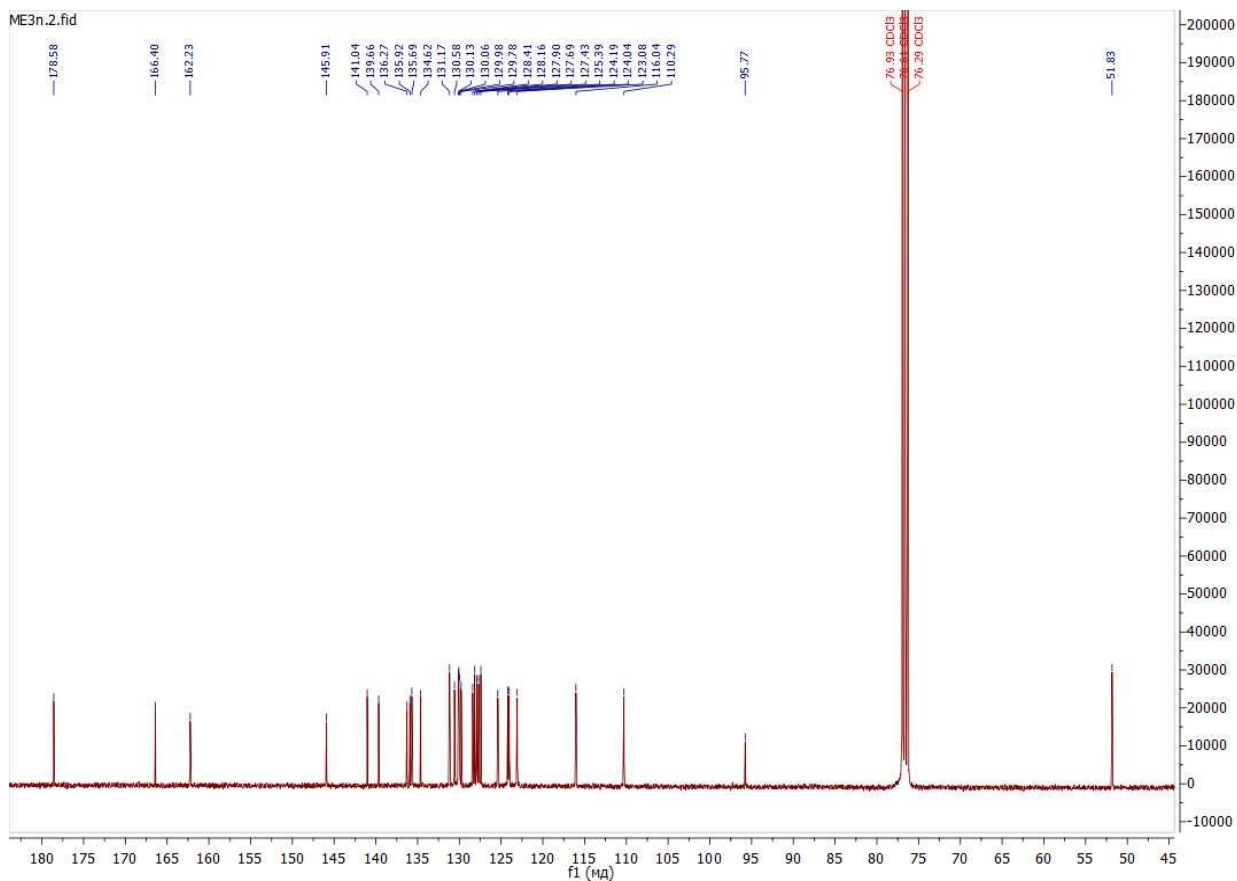

Figure S22.  $^{13}\text{C}$   $\{^1\text{H}\}$  NMR spectrum of **8** (101 MHz, 298K,  $\text{CDCl}_3$ ).

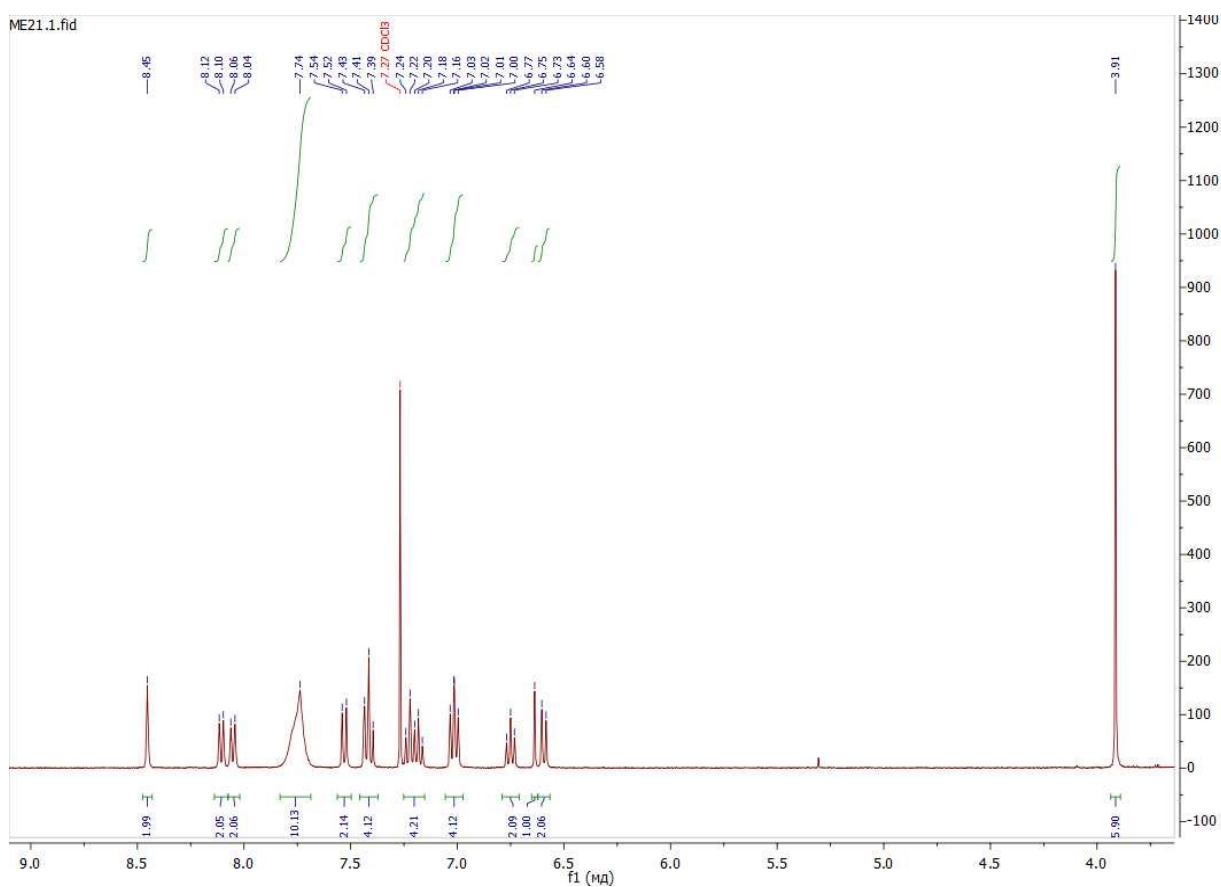

Figure S23.  $^1\text{H}$  NMR spectrum of **9** (400 MHz, 298K,  $\text{CDCl}_3$ ).

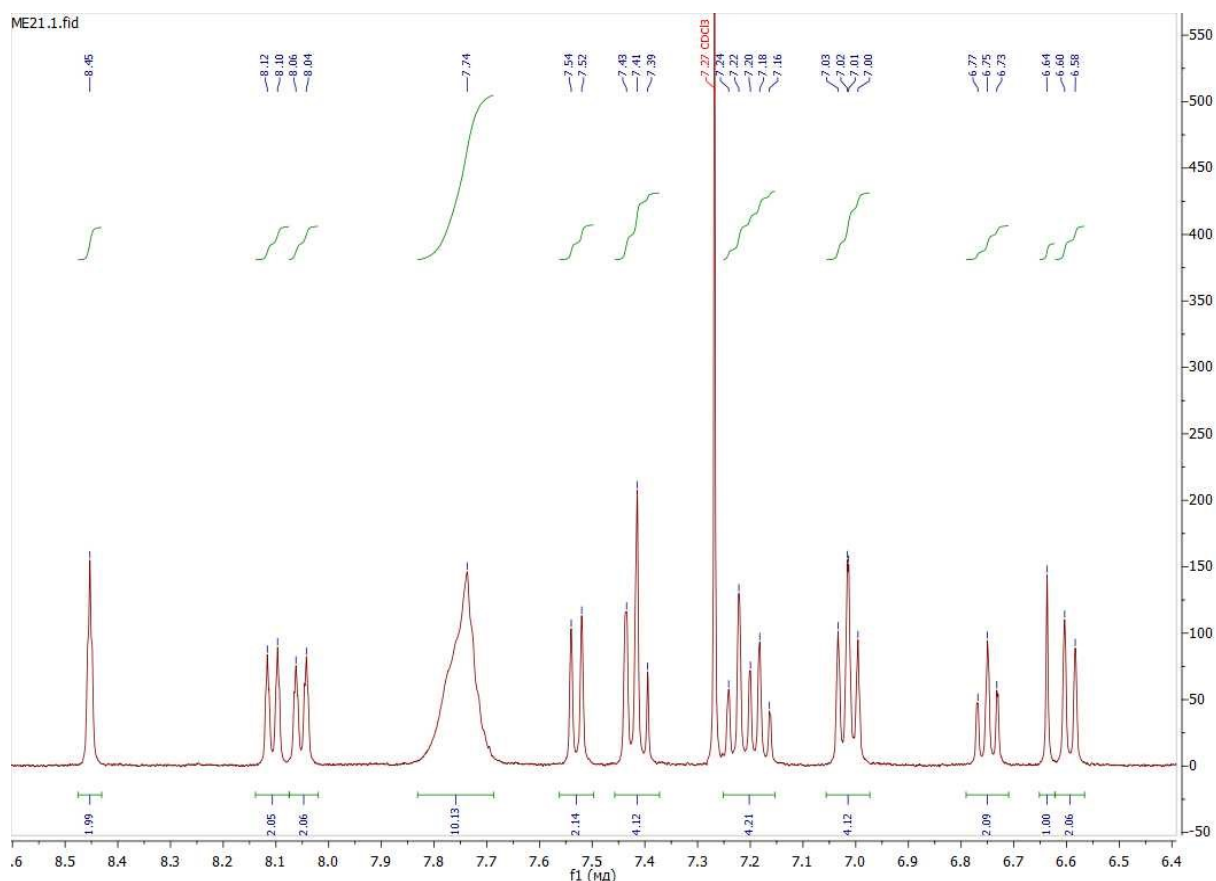

Figure S24. Aromatic region of <sup>1</sup>H NMR spectrum of **9** (400 MHz, 298K, CDCl<sub>3</sub>).

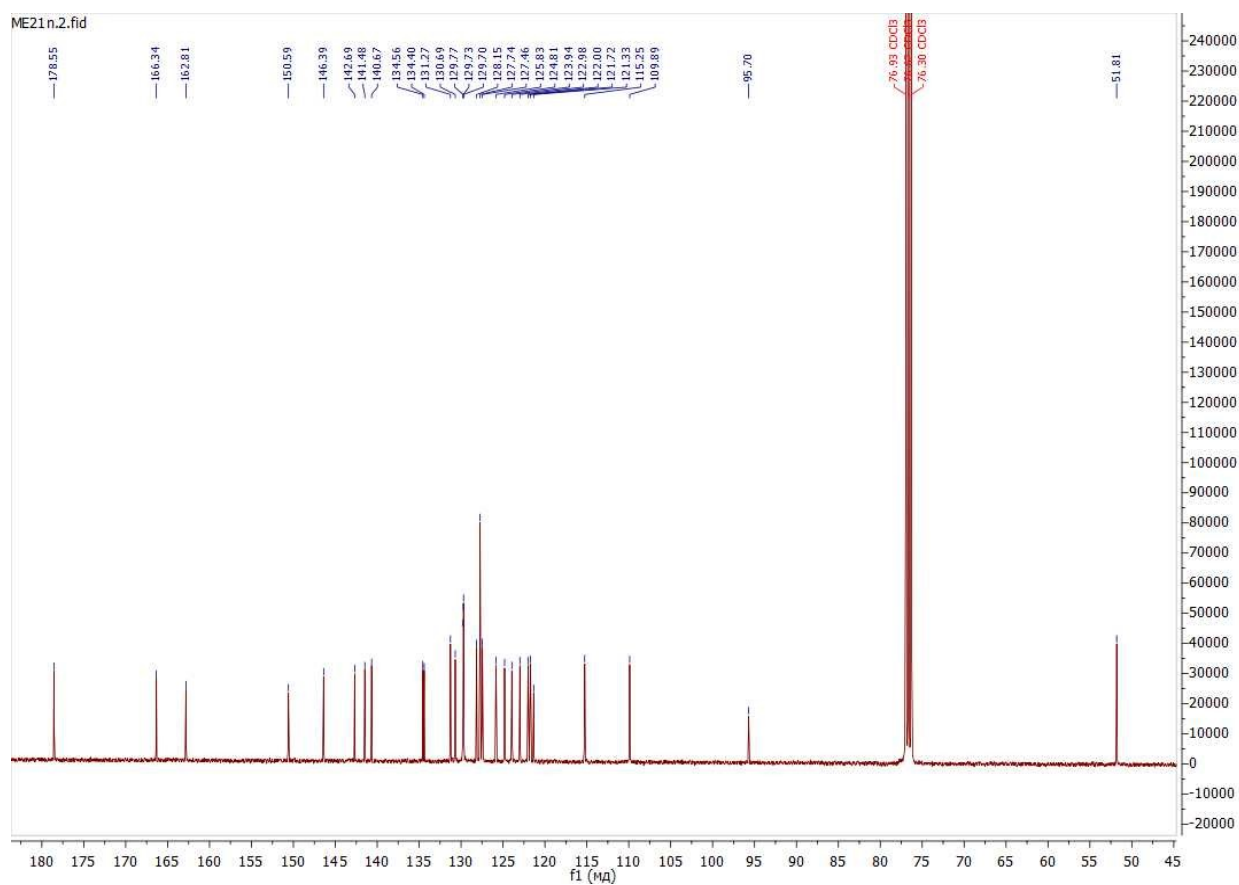

Figure S25. <sup>13</sup>C {<sup>1</sup>H} NMR spectrum of **9** (101 MHz, 298K, CDCl<sub>3</sub>).

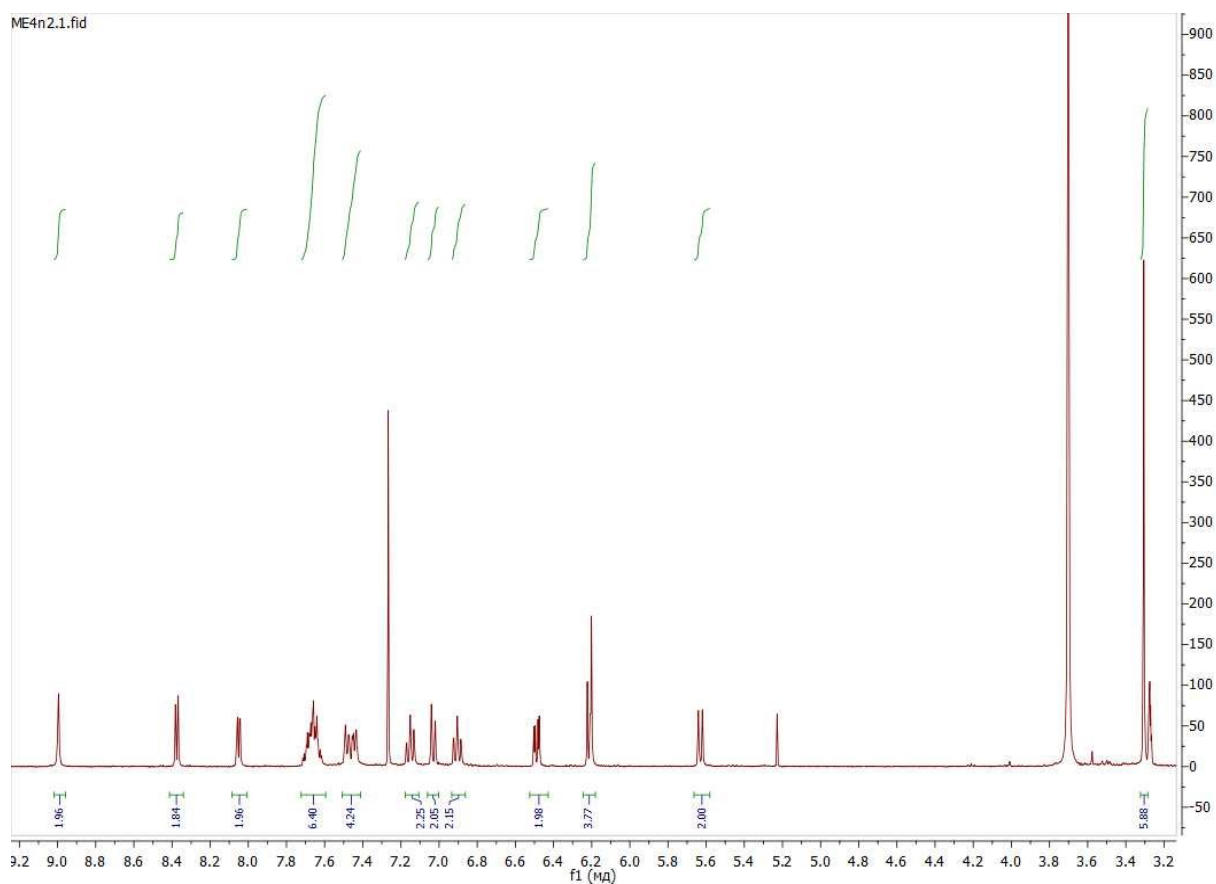

Figure S26.  $^1\text{H}$  NMR spectrum of **10** (400 MHz, 298K,  $\text{CDCl}_3:\text{CD}_3\text{OD}$  6:1).

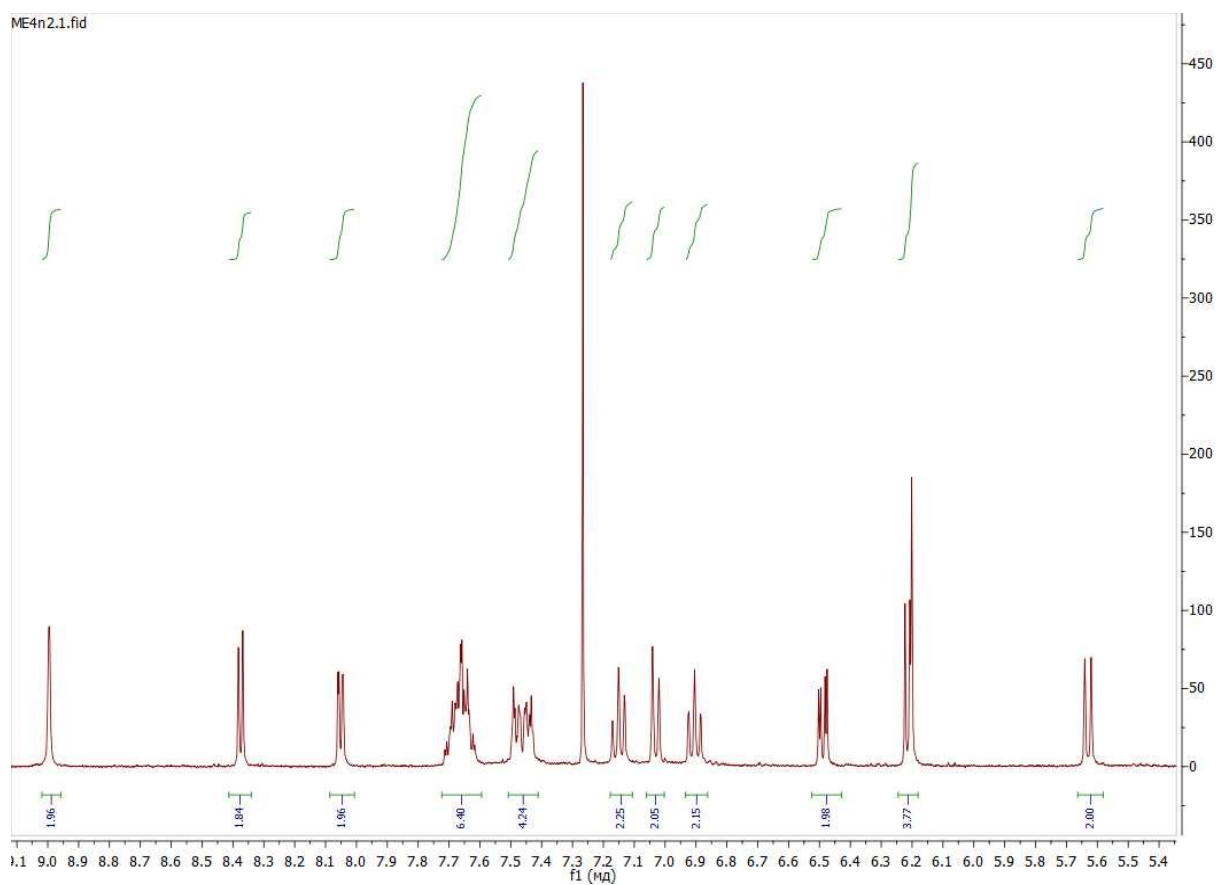

Figure S27. Aromatic region of  $^1\text{H}$  NMR spectrum of **10** (400 MHz, 298K,  $\text{CDCl}_3:\text{CD}_3\text{OD}$  6:1).



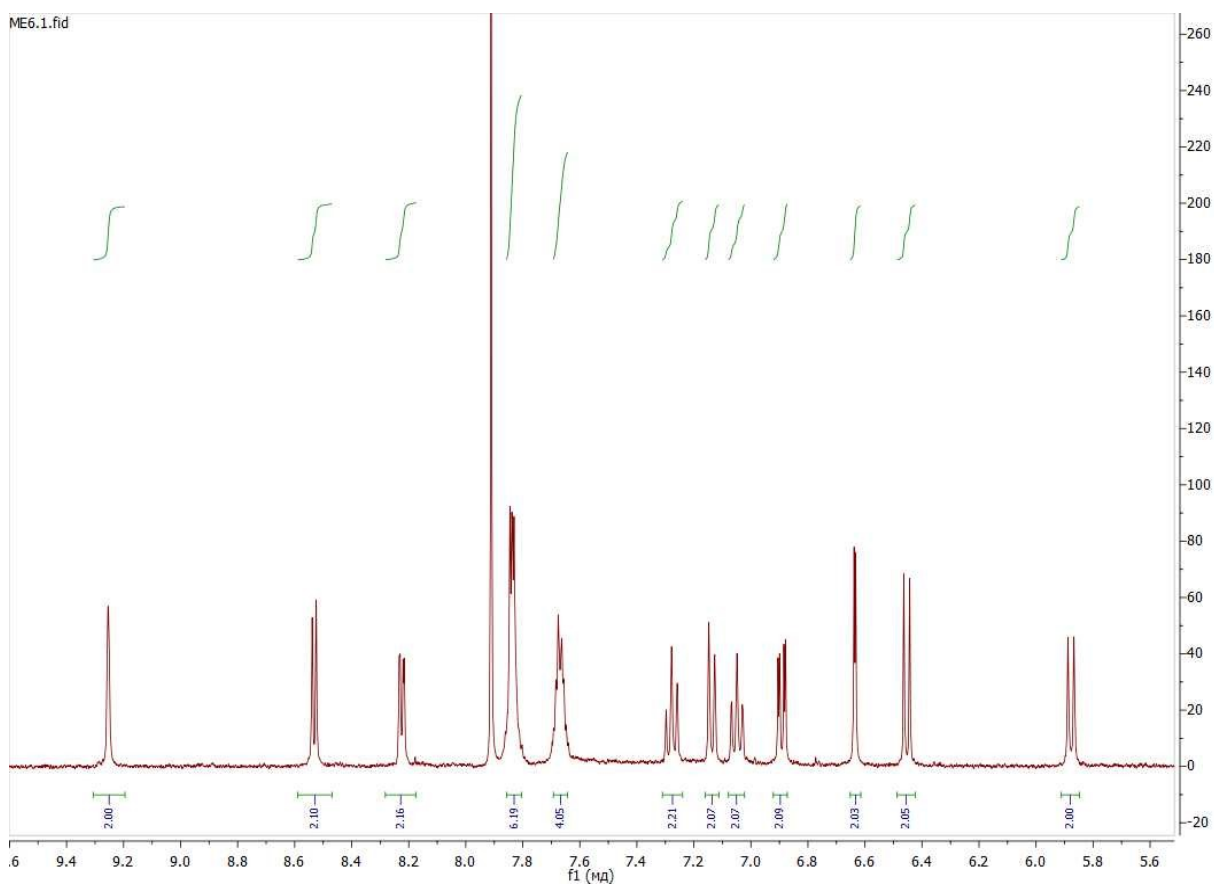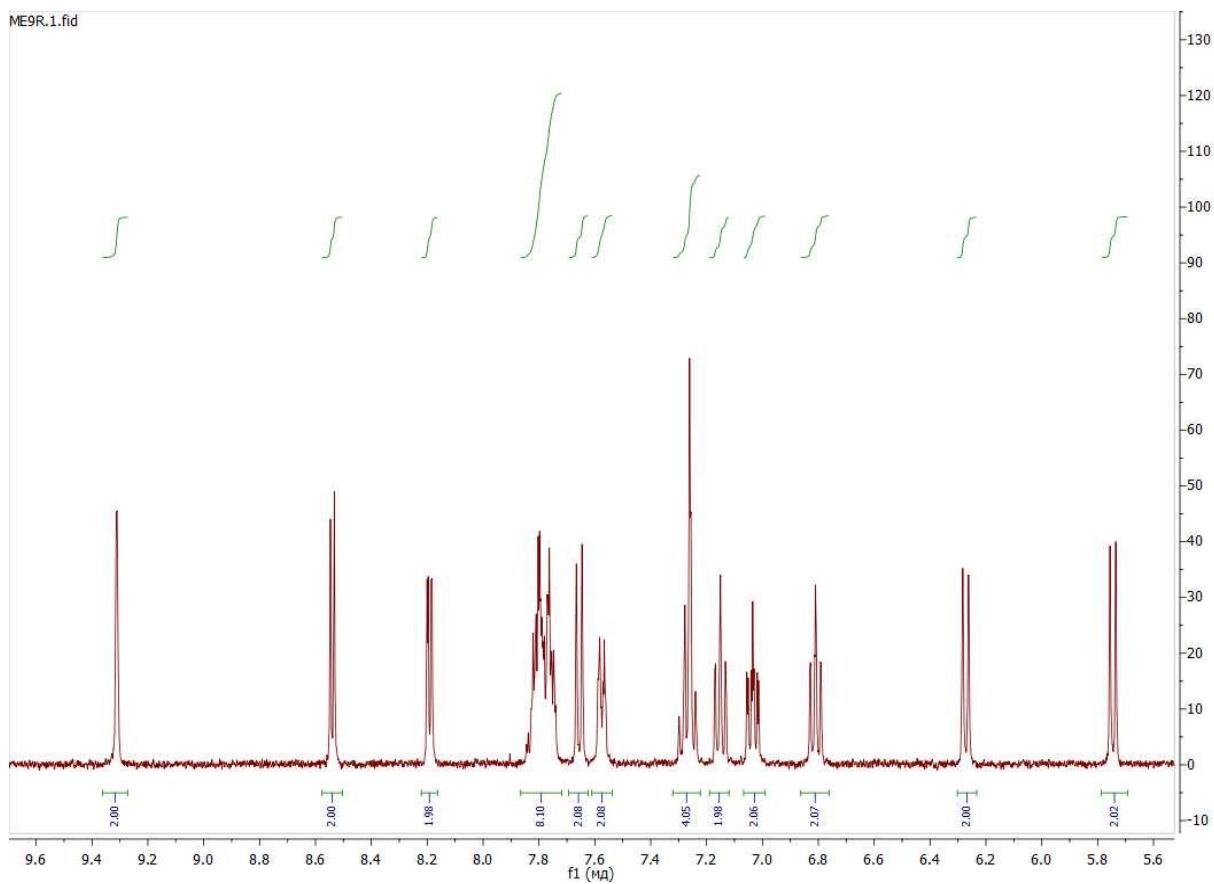



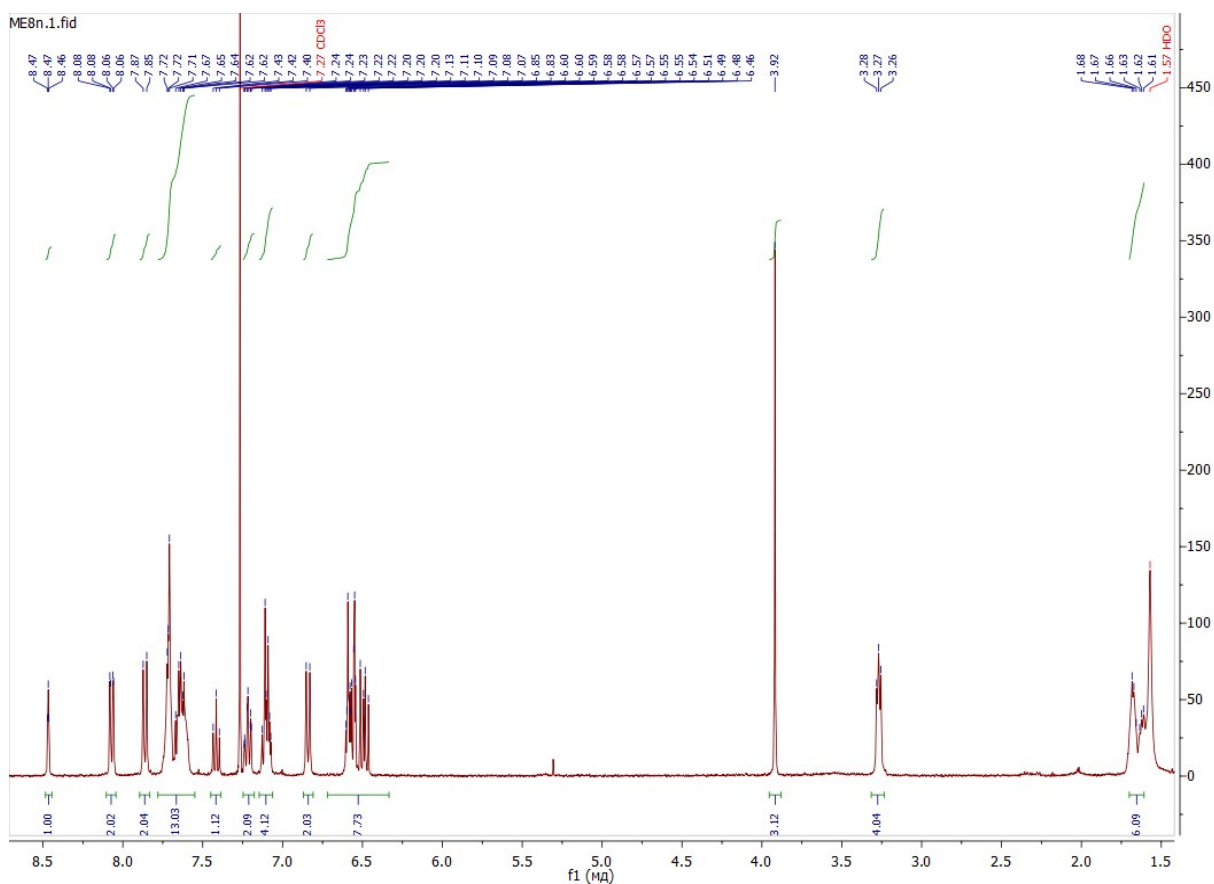

Figure S30.  $^1\text{H}$  NMR spectrum of **13** (400 MHz, 298K,  $\text{CDCl}_3$ ).

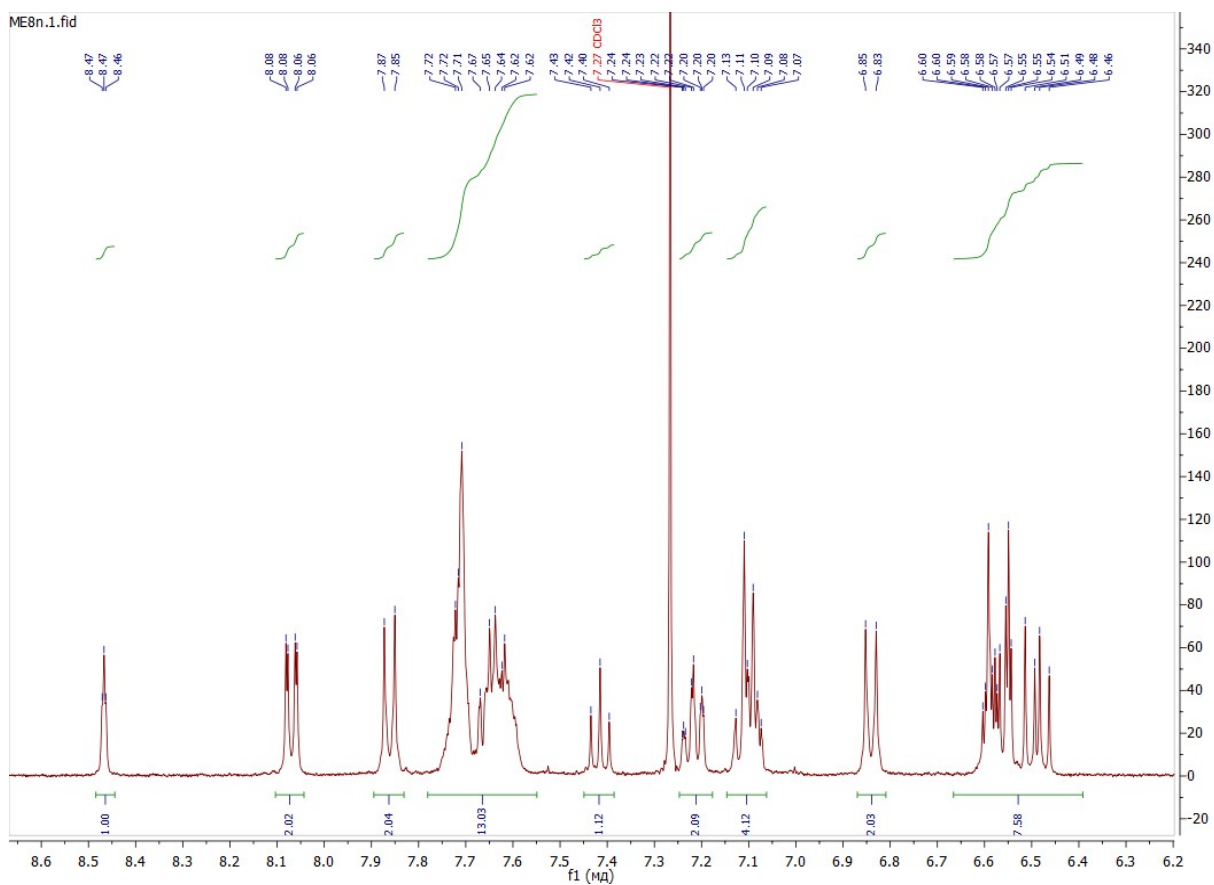

Figure S31. Aromatic region of  $^1\text{H}$  NMR spectrum of **13** (400 MHz, 298K,  $\text{CDCl}_3$ )

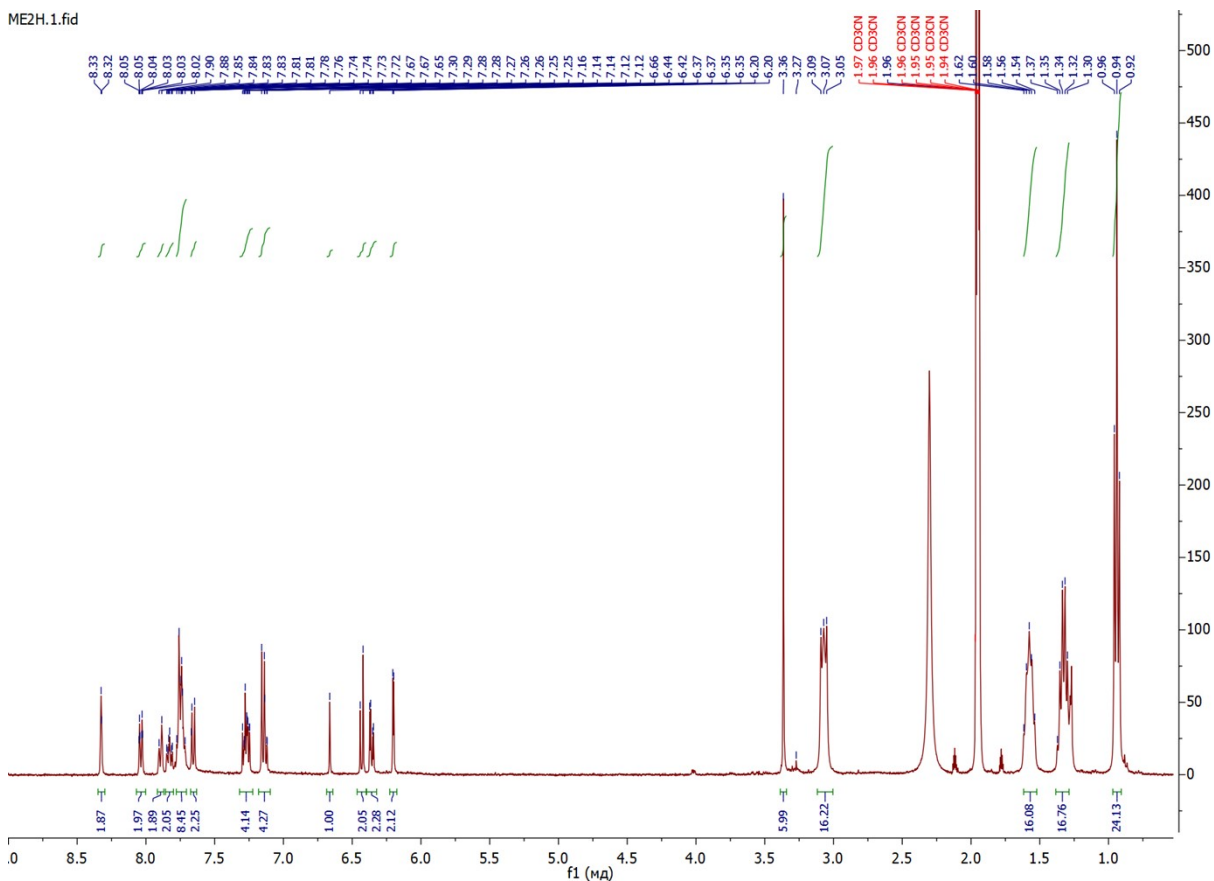

Figure S32. <sup>1</sup>H NMR spectrum of hydrolysed complex 2(TBA)<sup>+</sup>(**7H**)<sup>2-</sup> (400 MHz, 298K, CD<sub>3</sub>CN).

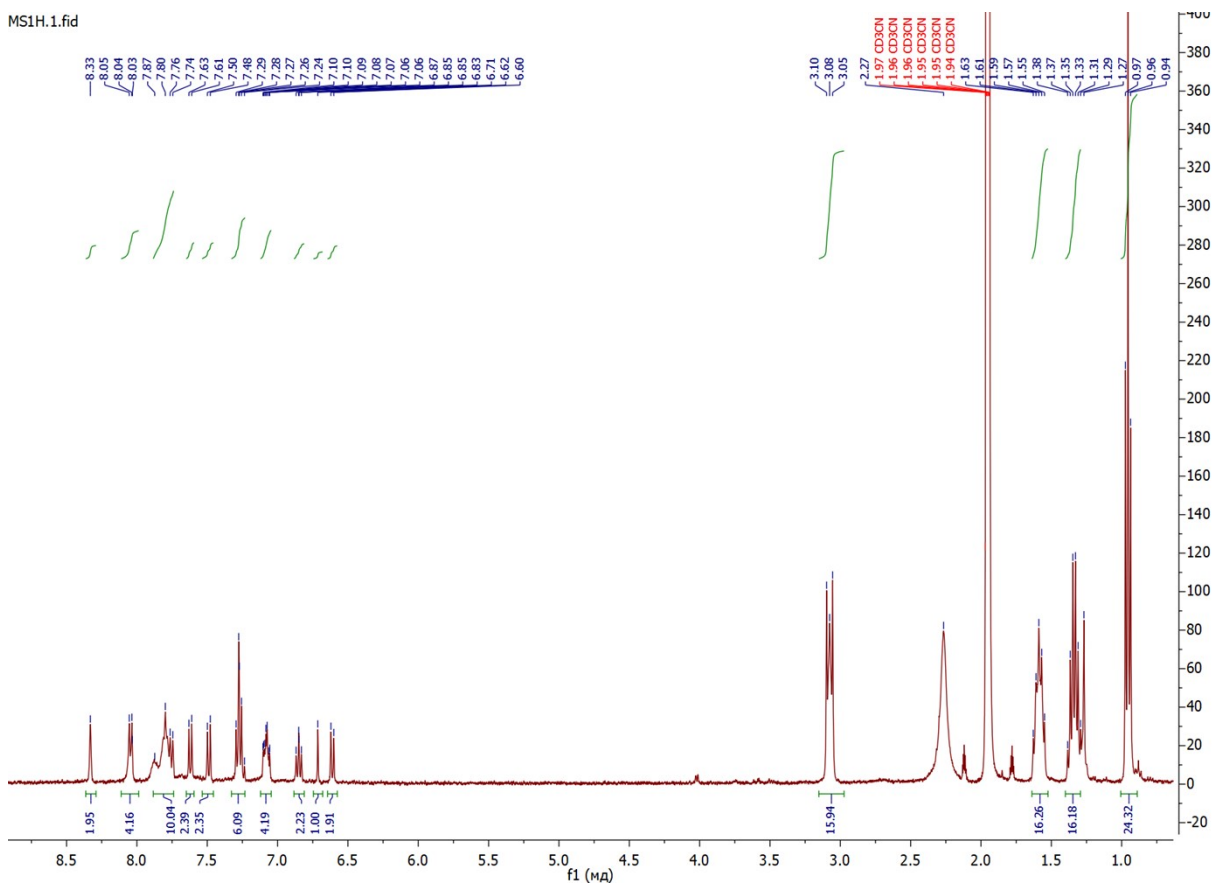

Figure S33. <sup>1</sup>H NMR spectrum of hydrolysed complex 2(TBA)<sup>+</sup>(**9H**)<sup>2-</sup> (400 MHz, 298K, CD<sub>3</sub>CN).

**Table S1.** High resolution mass-spectrum data (m/z) of complexes **1** – **13**.

| Complex   | [Ir(C <sup>^</sup> N) <sub>2</sub> (L)] <sup>+</sup> | [Ir(C <sup>^</sup> N) <sub>2</sub> ] <sup>+</sup> |
|-----------|------------------------------------------------------|---------------------------------------------------|
| <b>1</b>  | 1054.1986                                            | 767.1591                                          |
| <b>2</b>  | 1086.1394                                            | 799.0993                                          |
| <b>3</b>  | 1078.2371                                            | 791.1996                                          |
| <b>4</b>  | 1170.2816                                            | 883.2417                                          |
| <b>5</b>  | 1154.1941                                            | 867.1523                                          |
| <b>6</b>  | 1218.3963                                            | 931.3566                                          |
| <b>7</b>  | 1130.2886                                            | 832.2258                                          |
| <b>8</b>  | 1138.1861                                            | 840.1249                                          |
| <b>9</b>  | 1182.2107                                            | 884.1487                                          |
| <b>10</b> | 1035.2476                                            |                                                   |
| <b>11</b> | 1043.1473                                            | 797.0998                                          |
| <b>12</b> | 1087.1719                                            | 843.1219                                          |
| <b>12</b> | 1164.2613                                            | 799.0987                                          |

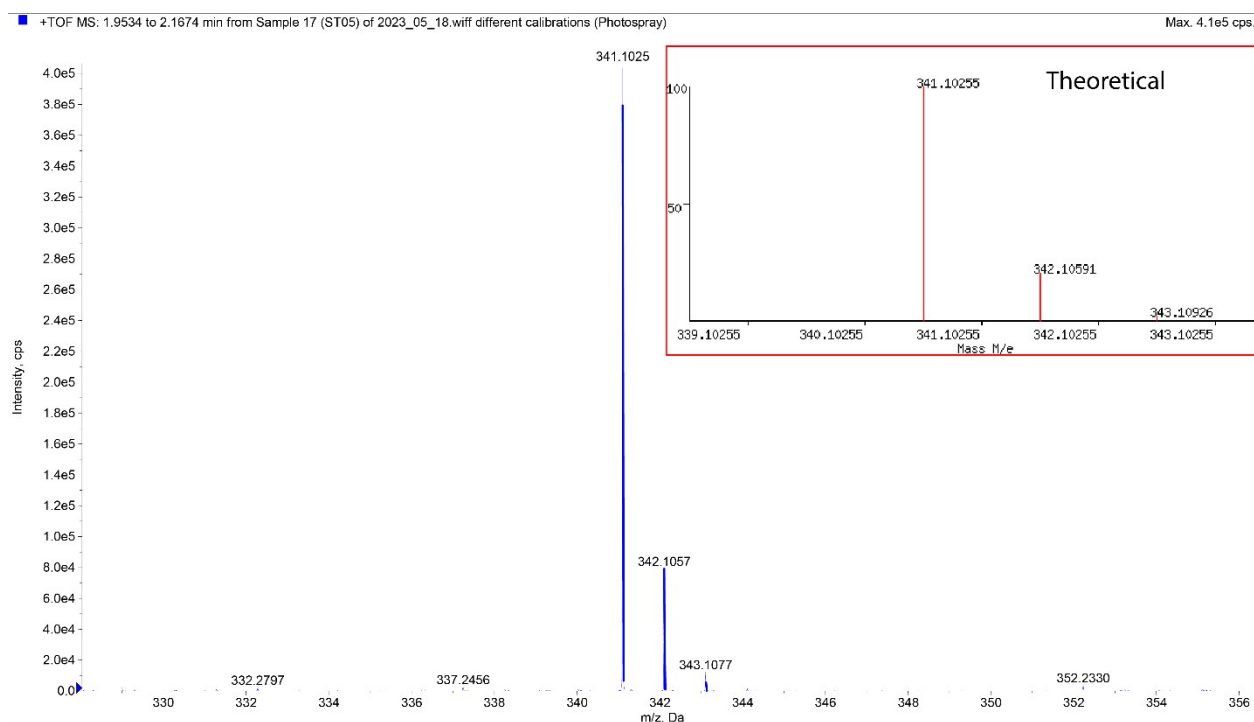

**Figure S34.** High resolution mass spectrum of L<sub>2</sub>.

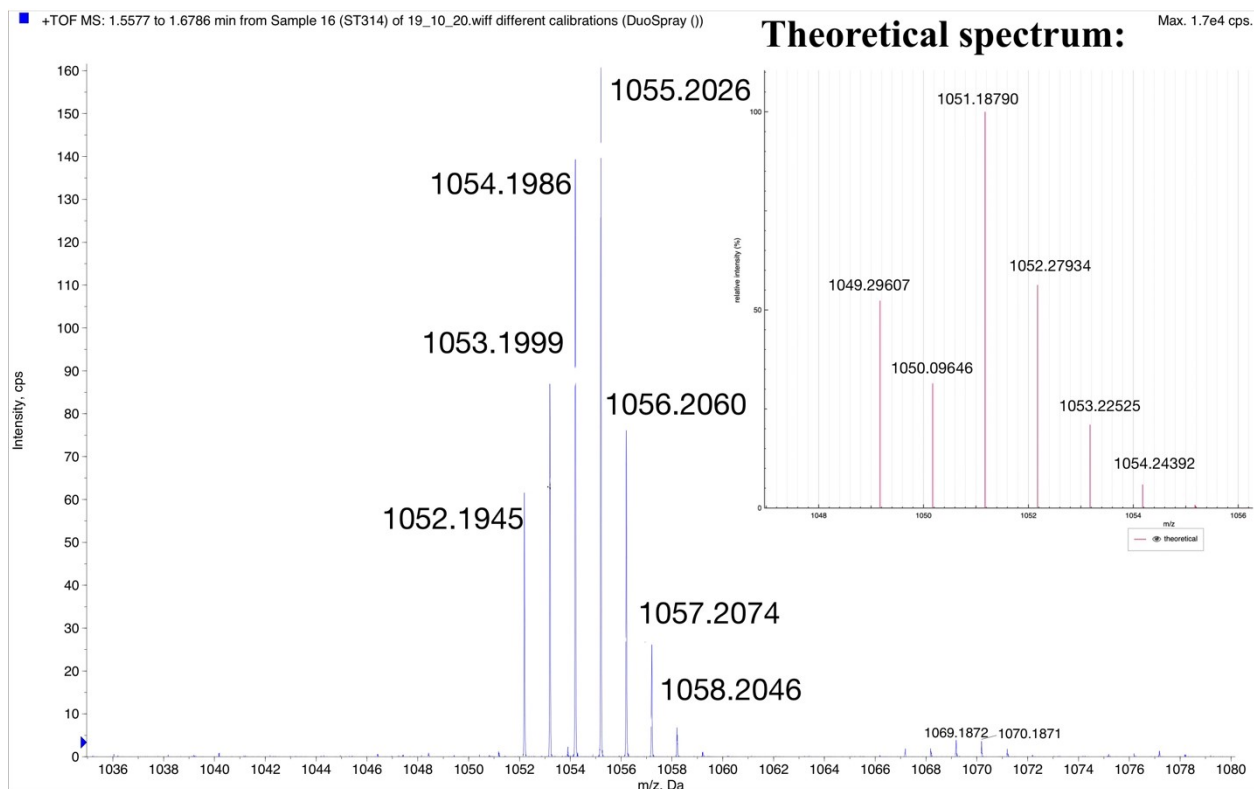

Figure S35. High resolution mass spectrum of **1**.

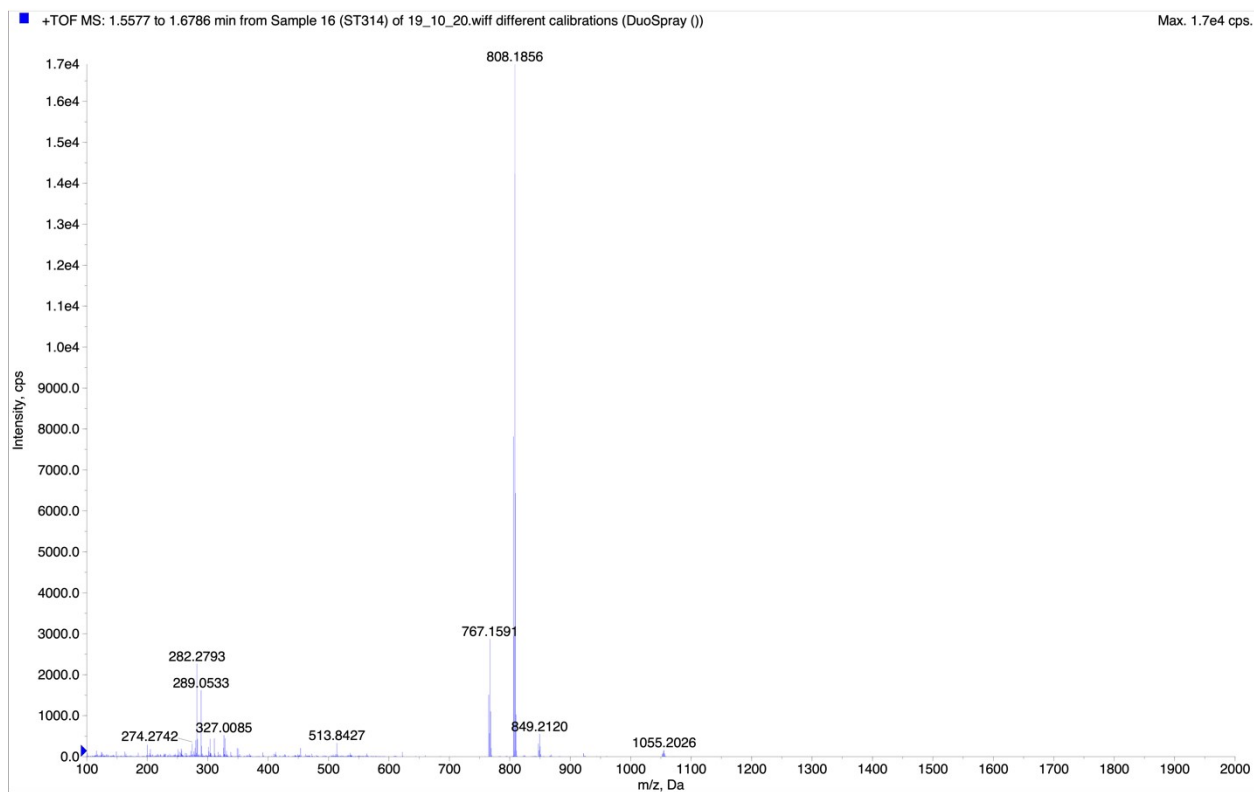

Figure S36. High resolution mass spectrum of **1**.

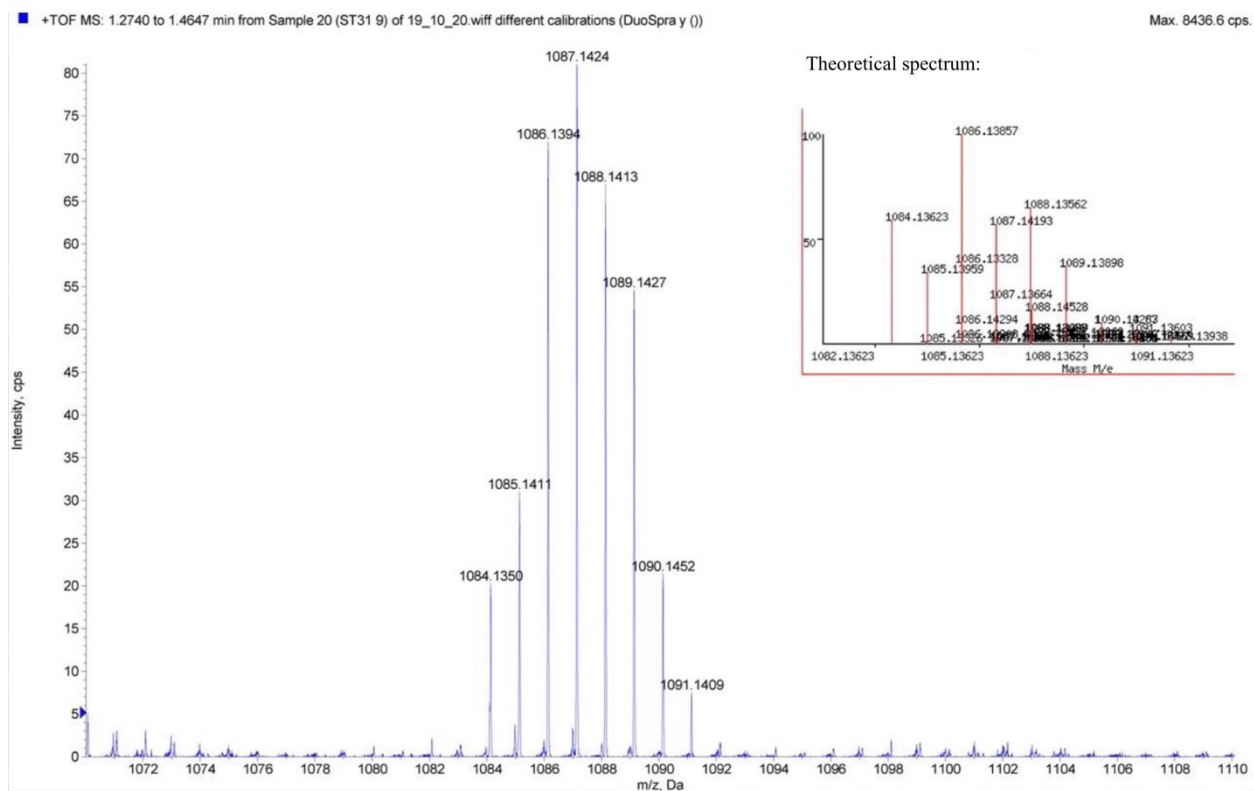

Figure S37. High resolution mass spectrum of 2.

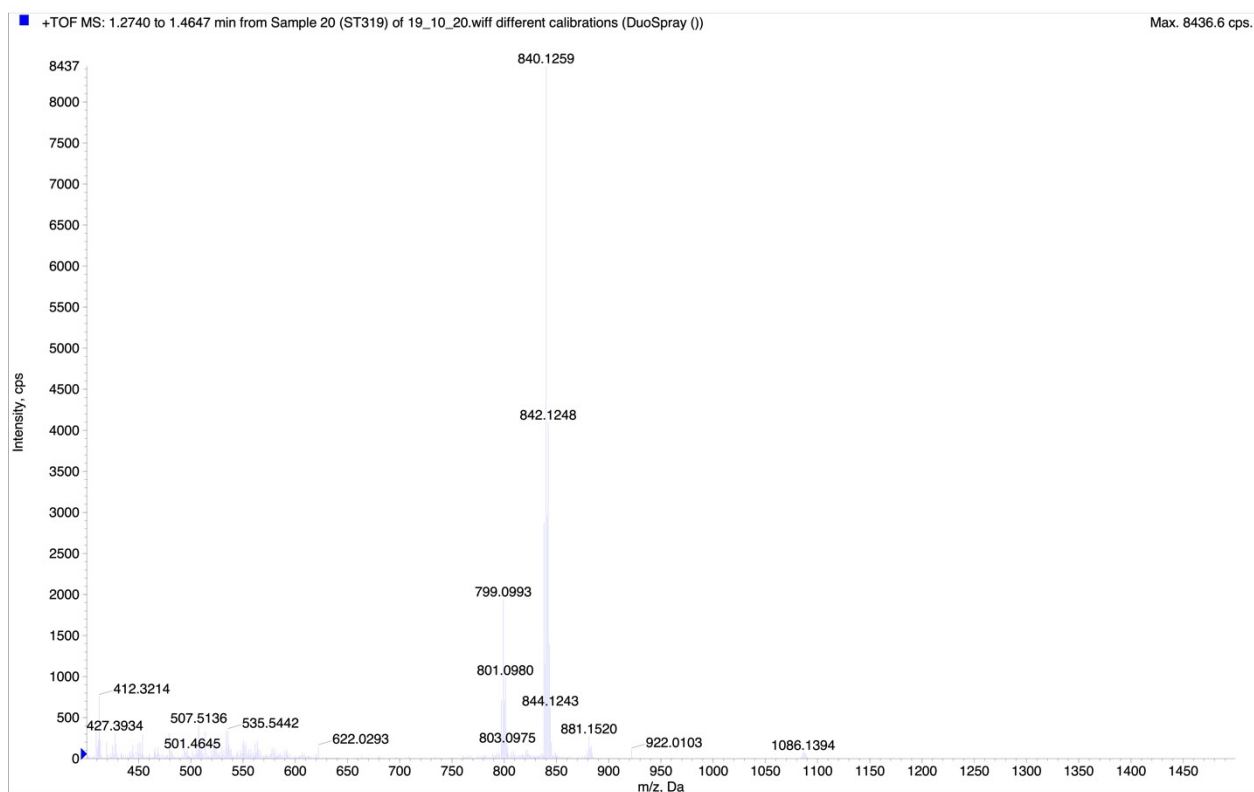

Figure S38. High resolution mass spectrum of 2.

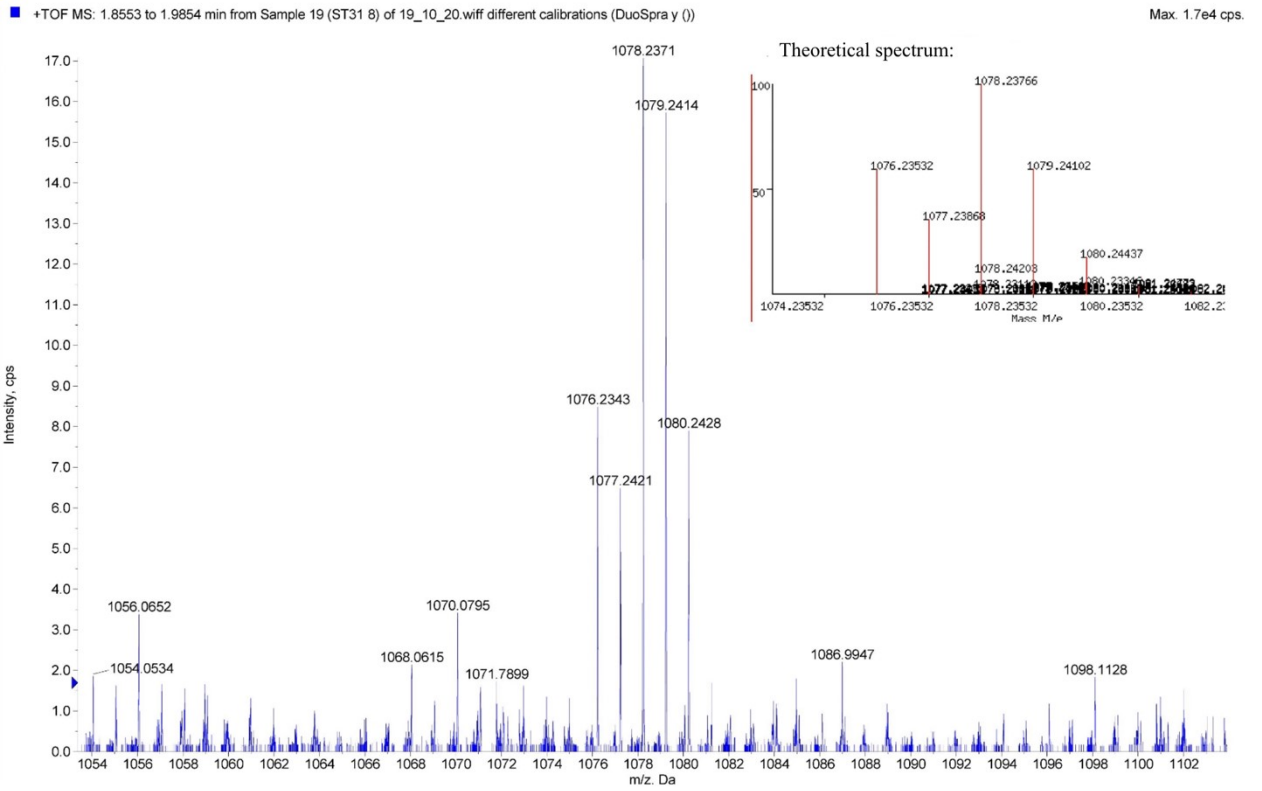

Figure S39. High resolution mass spectrum of 3.

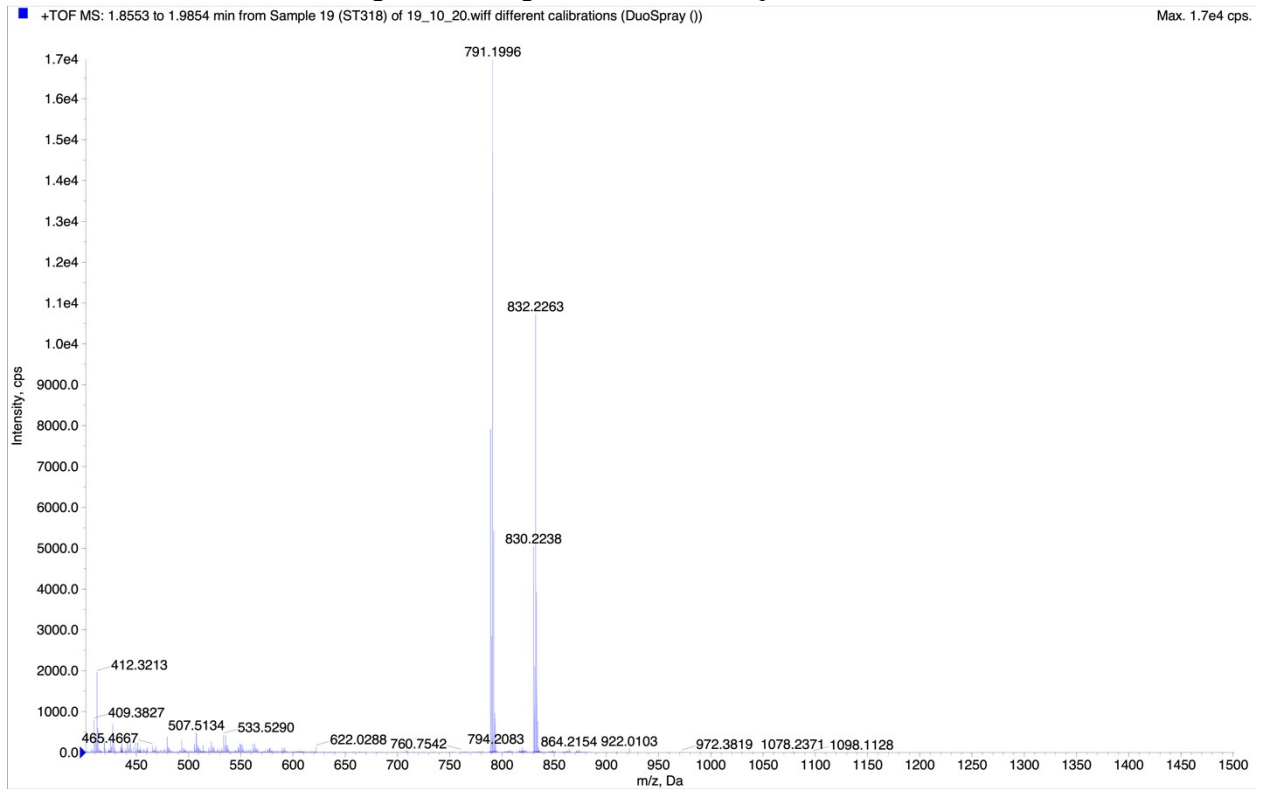

Figure S40. High resolution mass spectrum of 3.

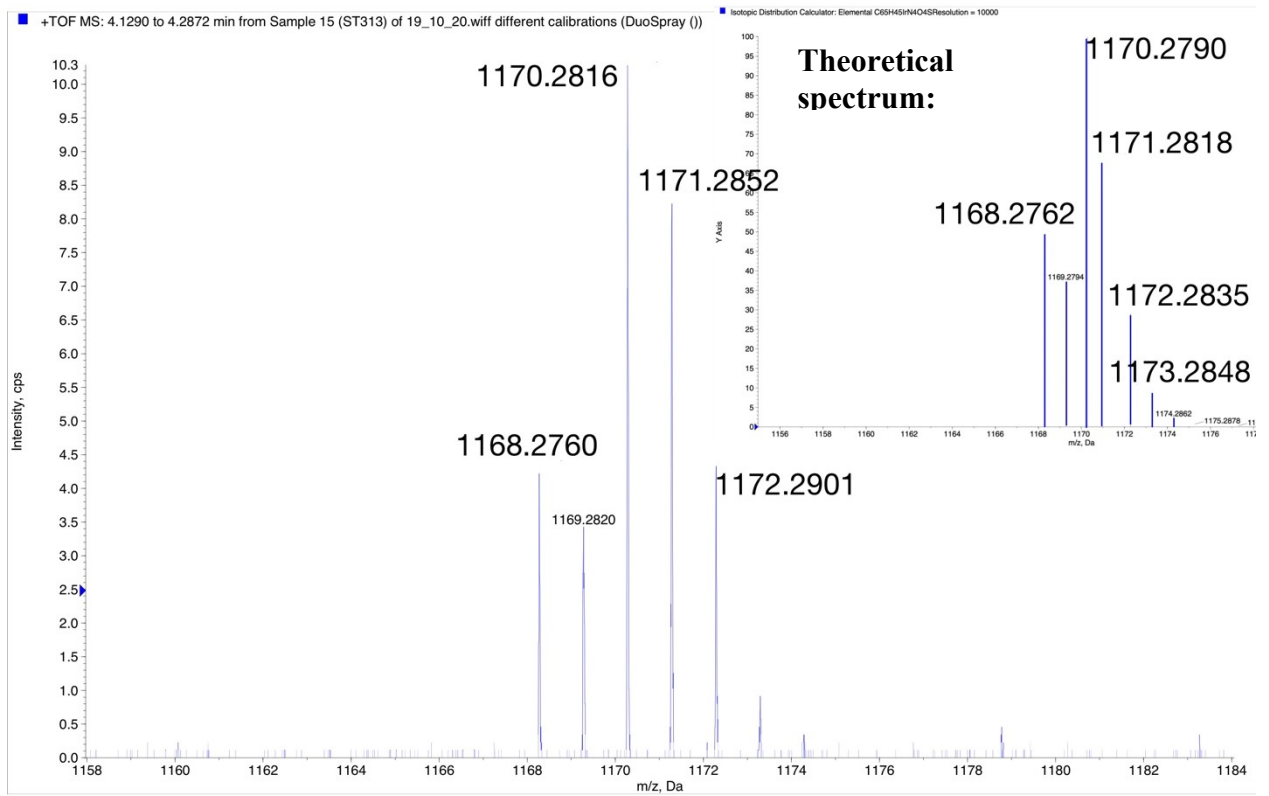

Figure S41. High resolution mass spectrum of 4.

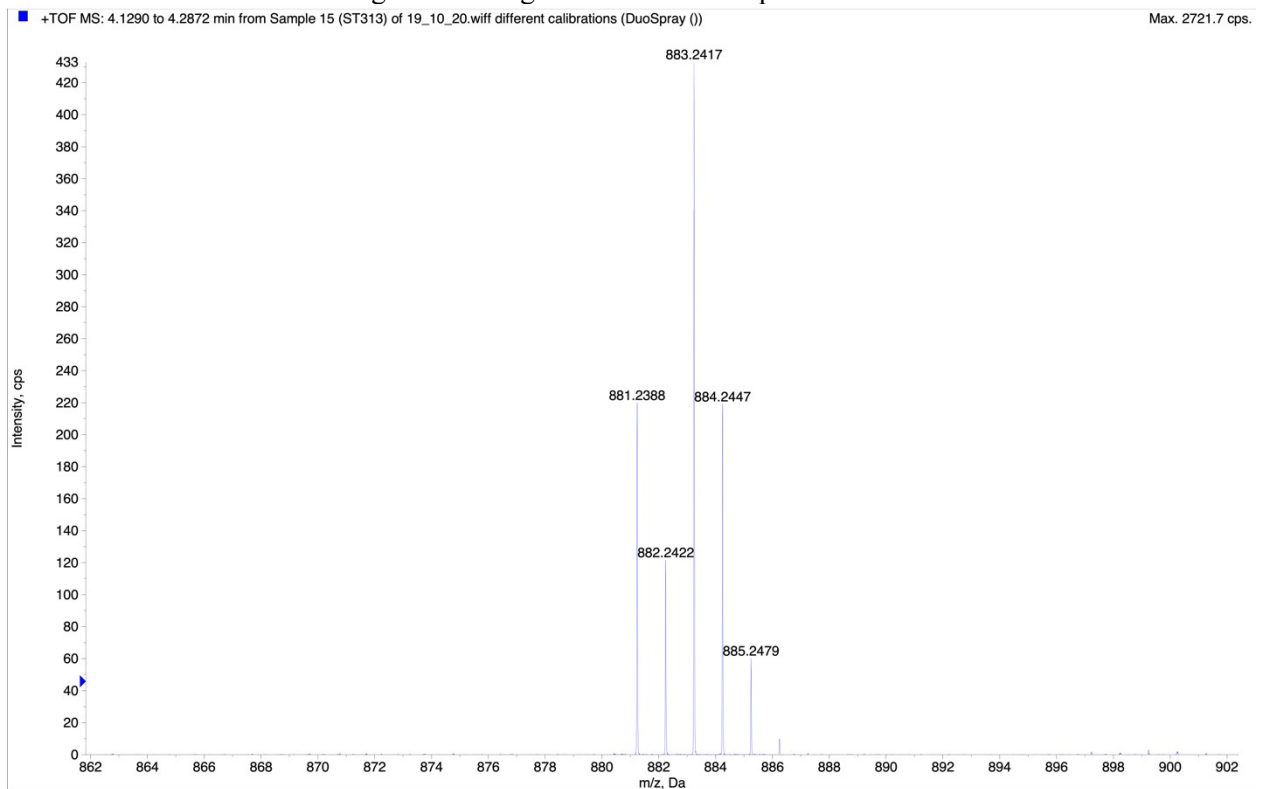

Figure S42. High resolution mass spectrum of 4.

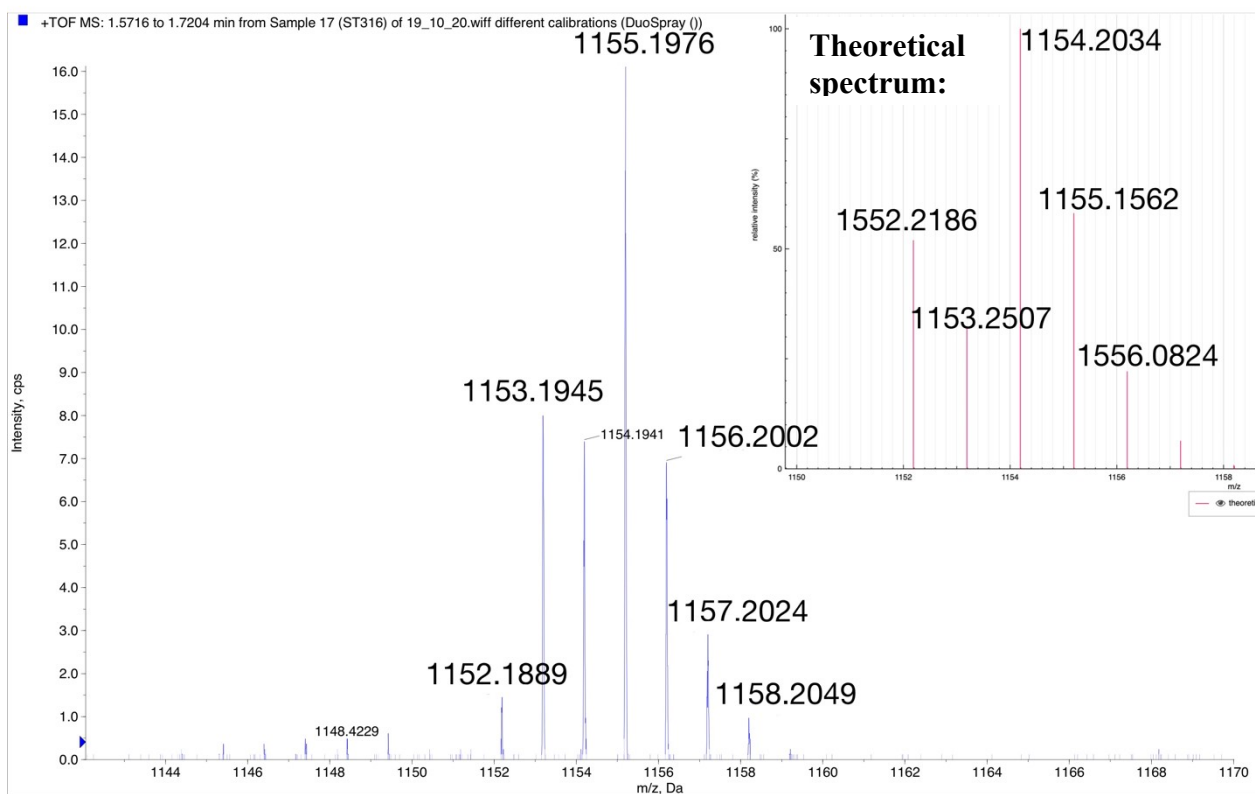

Figure S43. High resolution mass spectrum of 5.

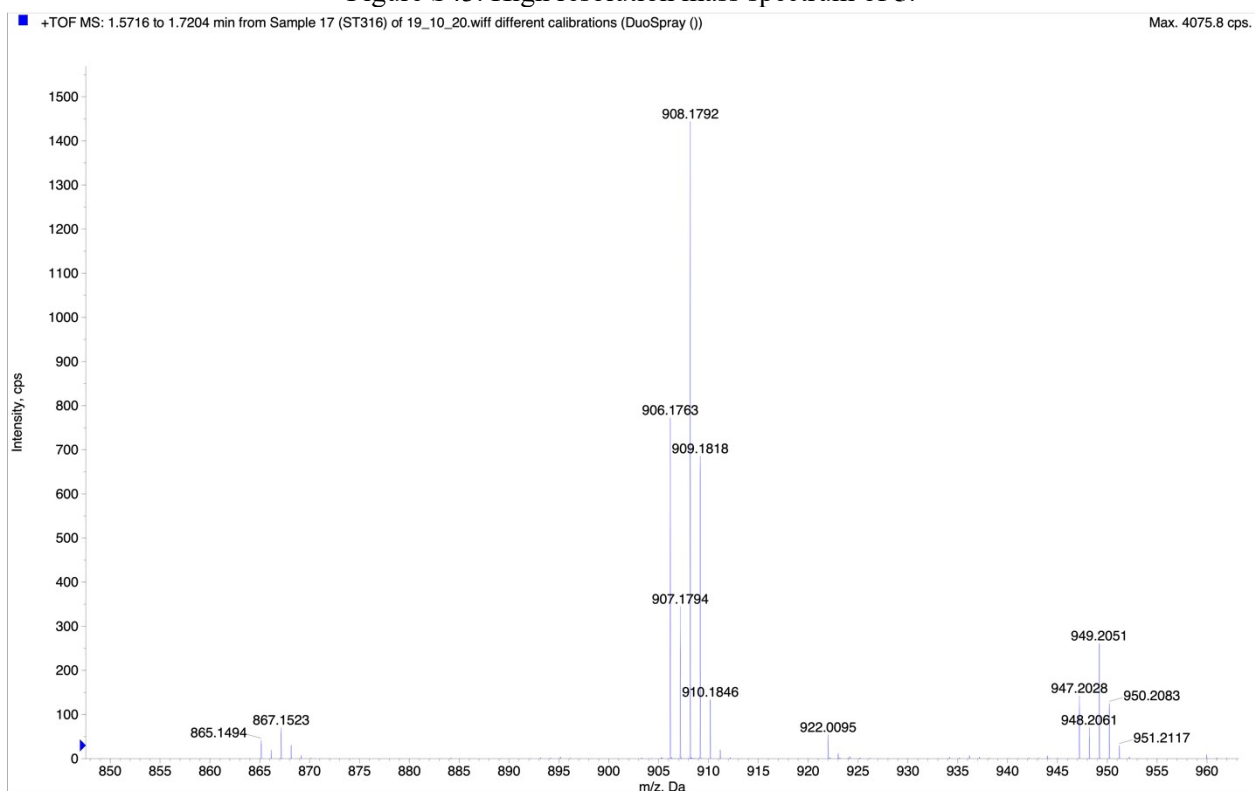

Figure S44. High resolution mass spectrum of 5.



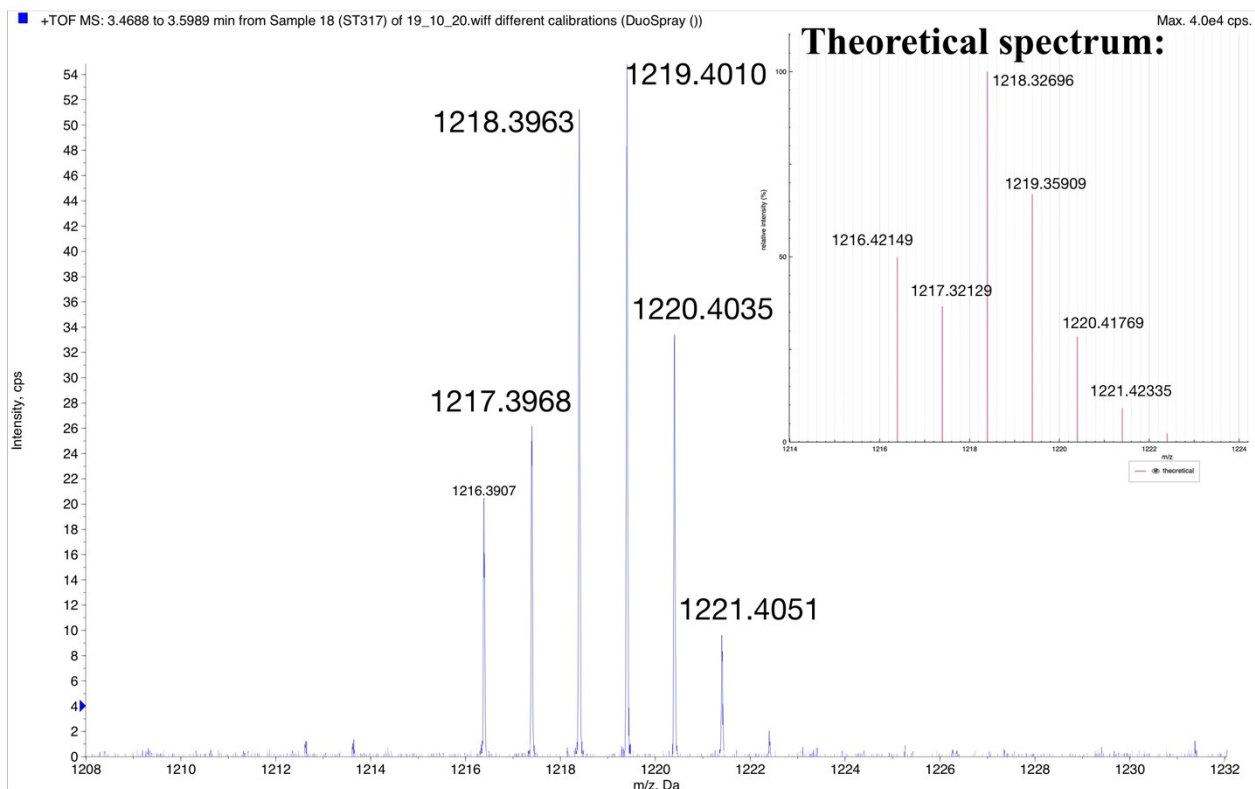

Figure S45. High resolution mass spectrum of 6.

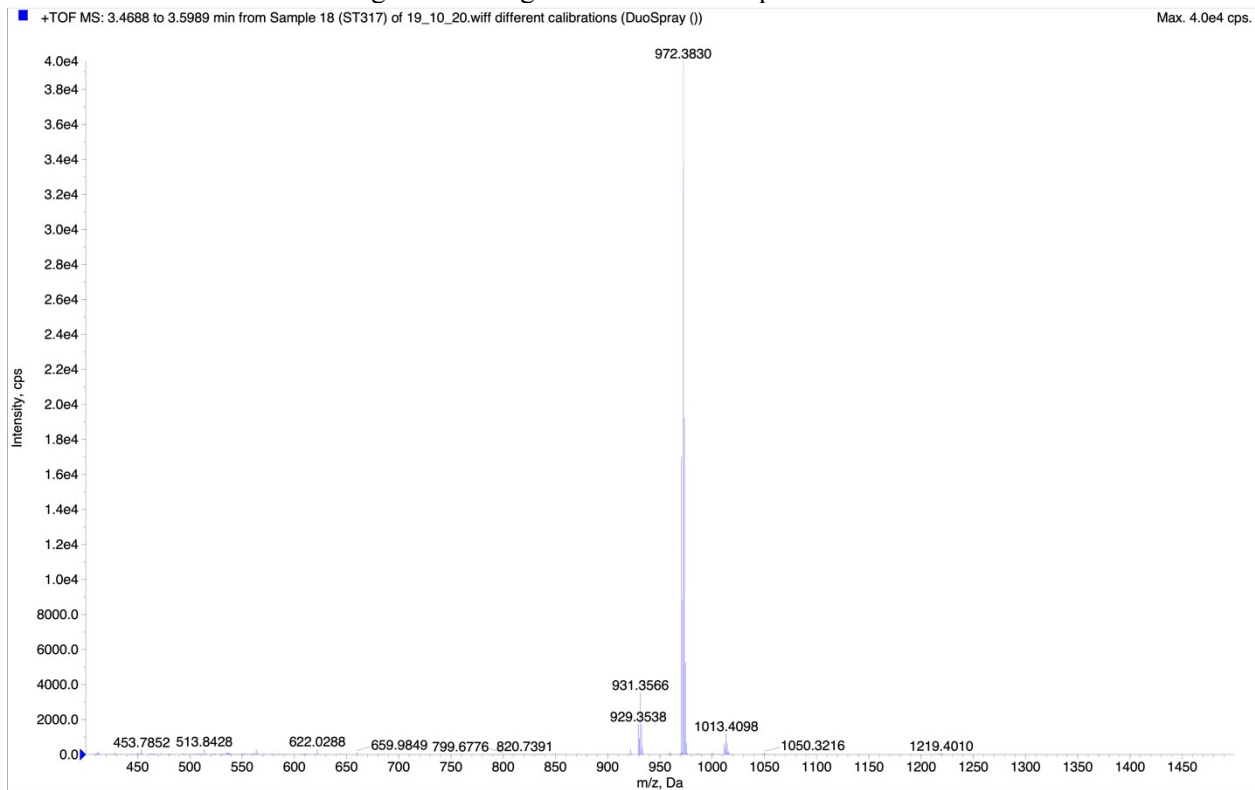

Figure S46. High resolution mass spectrum of 6.

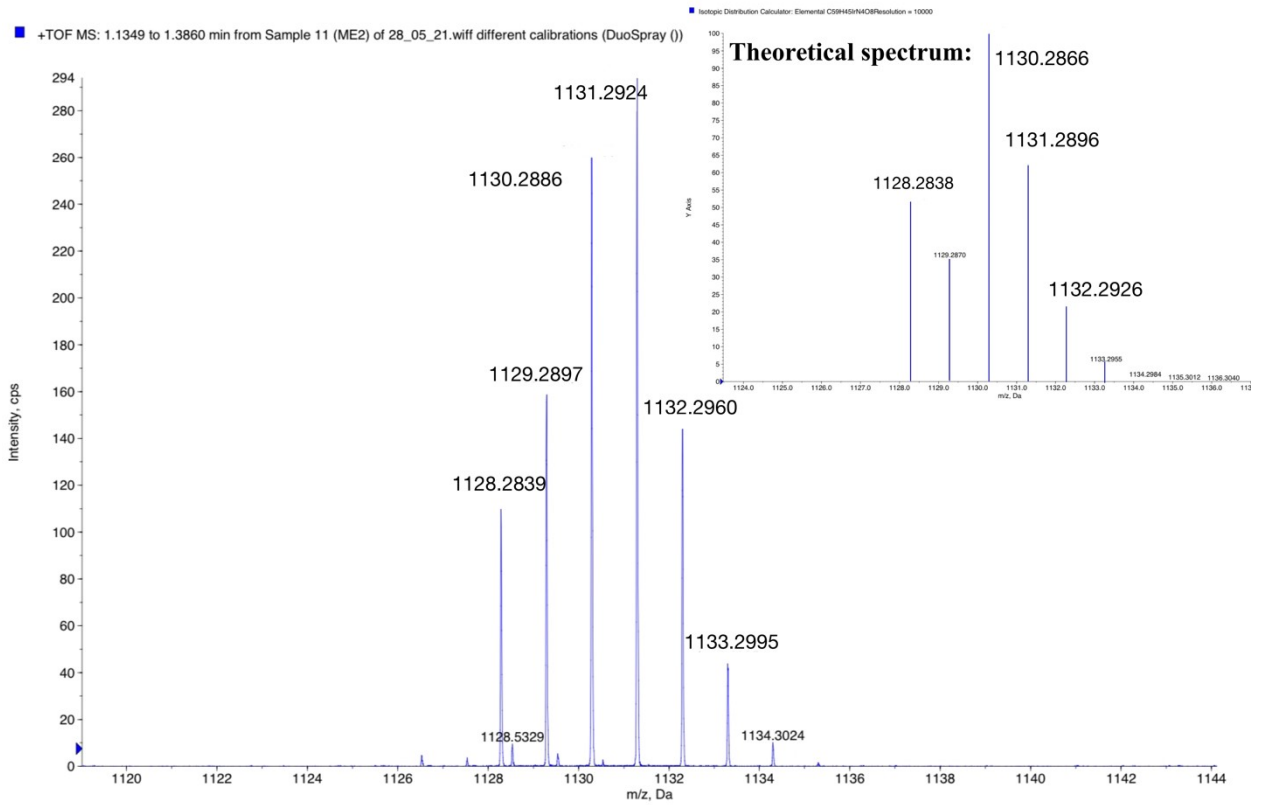

Figure S47. High resolution mass spectrum of 7.

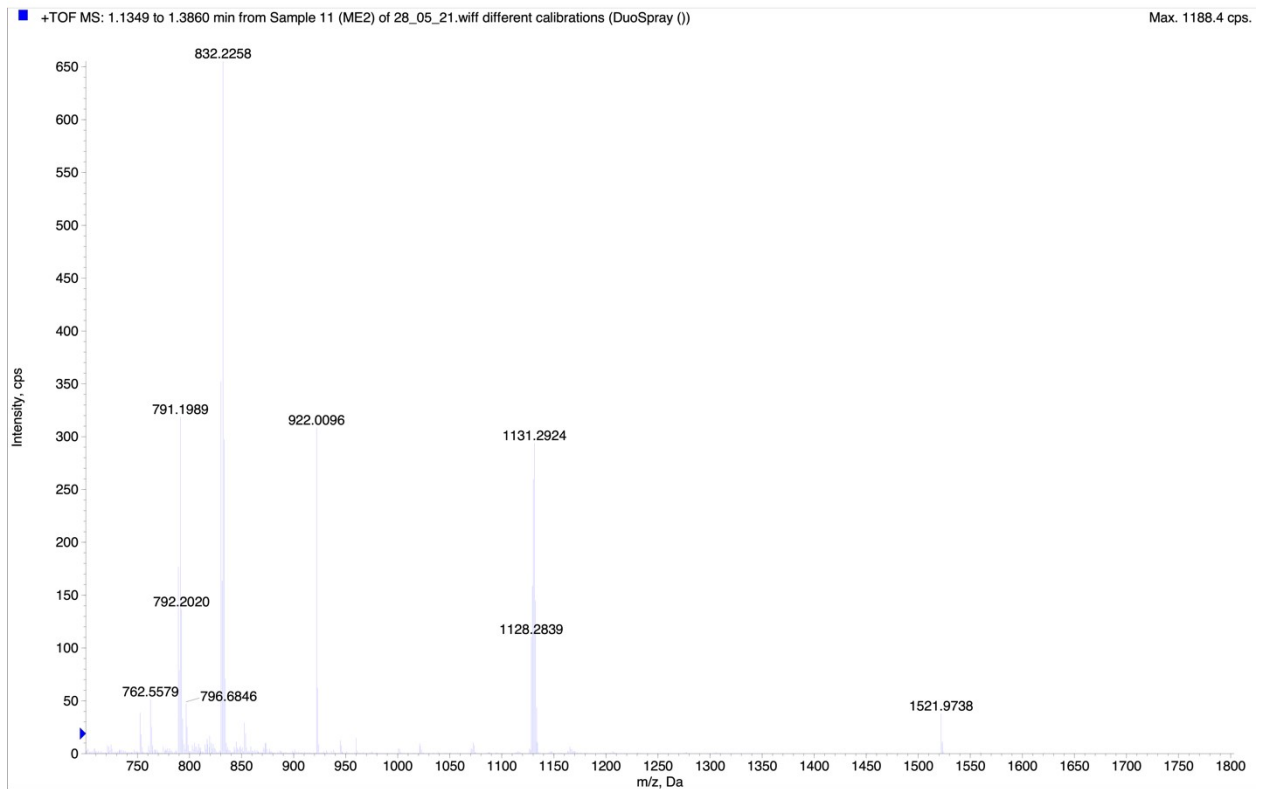

Figure S48. High resolution mass spectrum of 7.

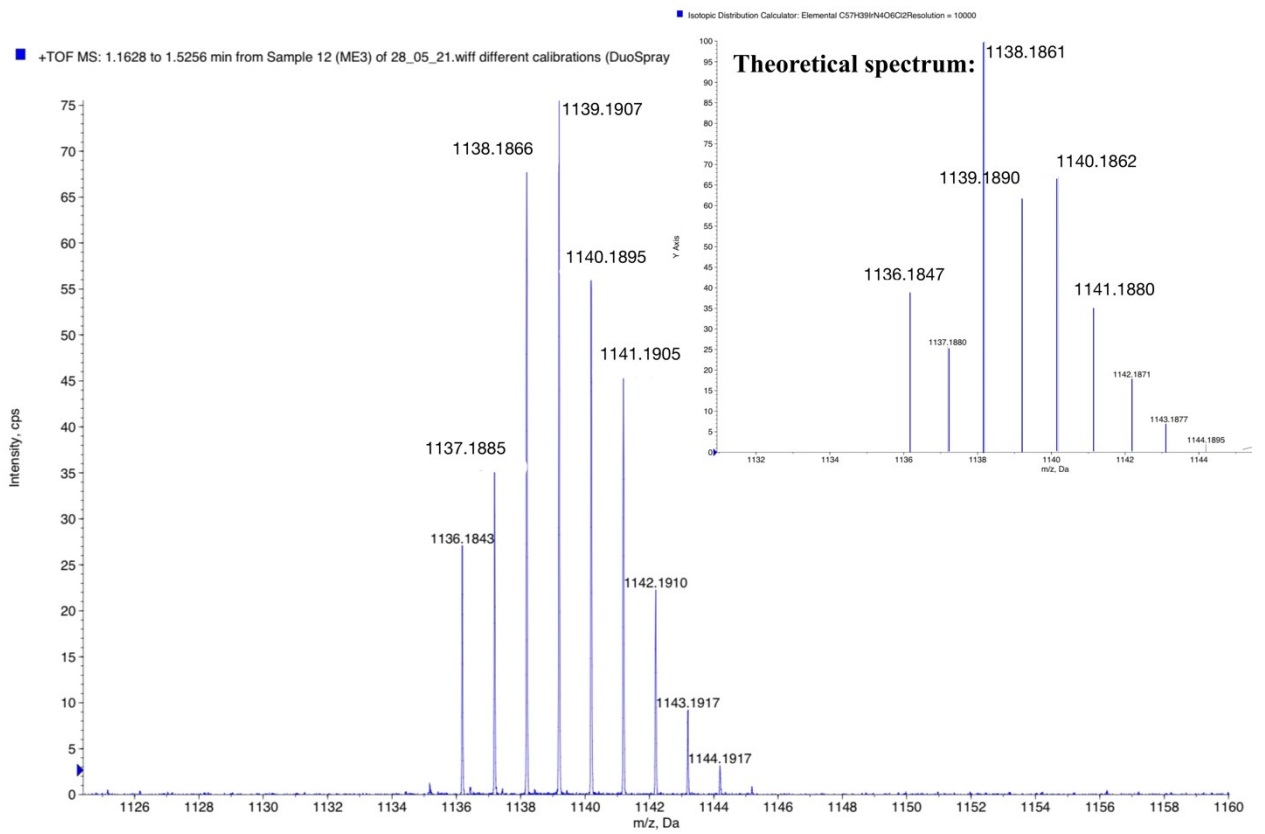

Figure S49. High resolution mass spectrum of **8**.

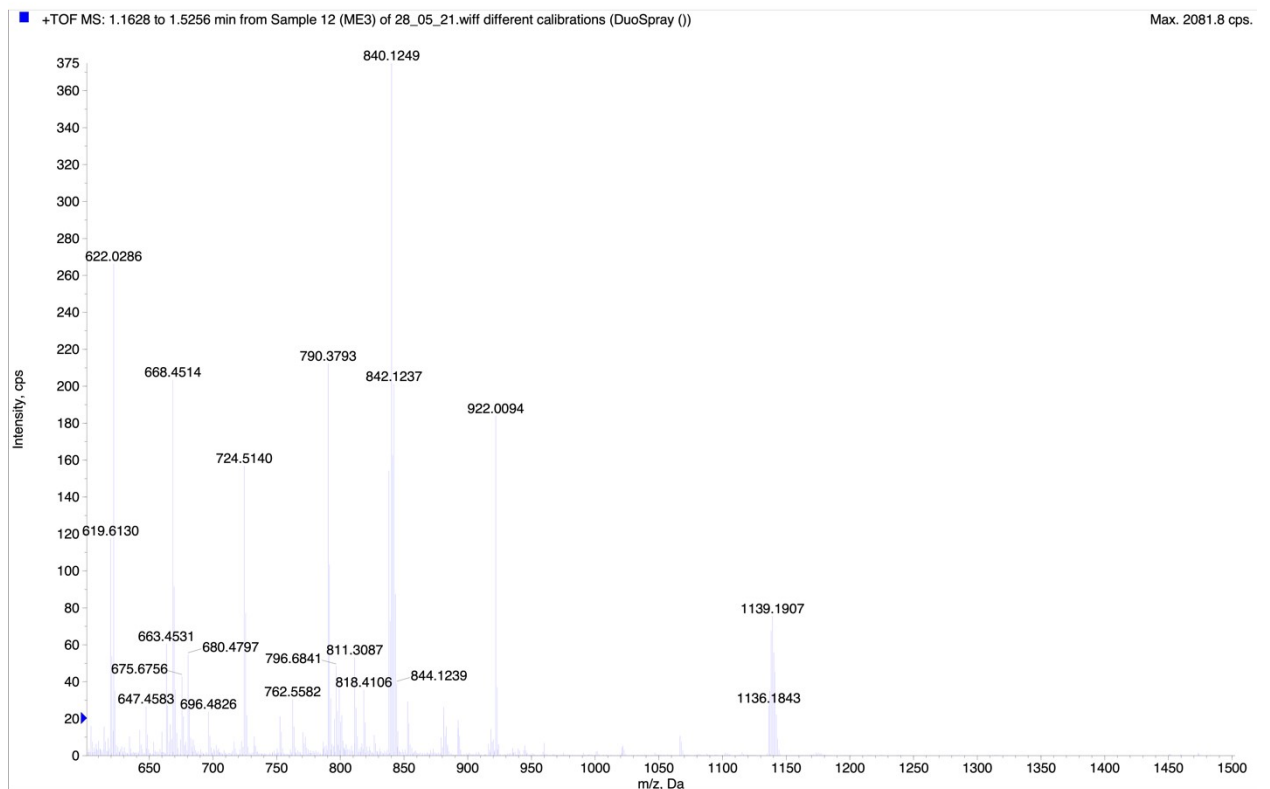

Figure S50. High resolution mass spectrum of **8**.

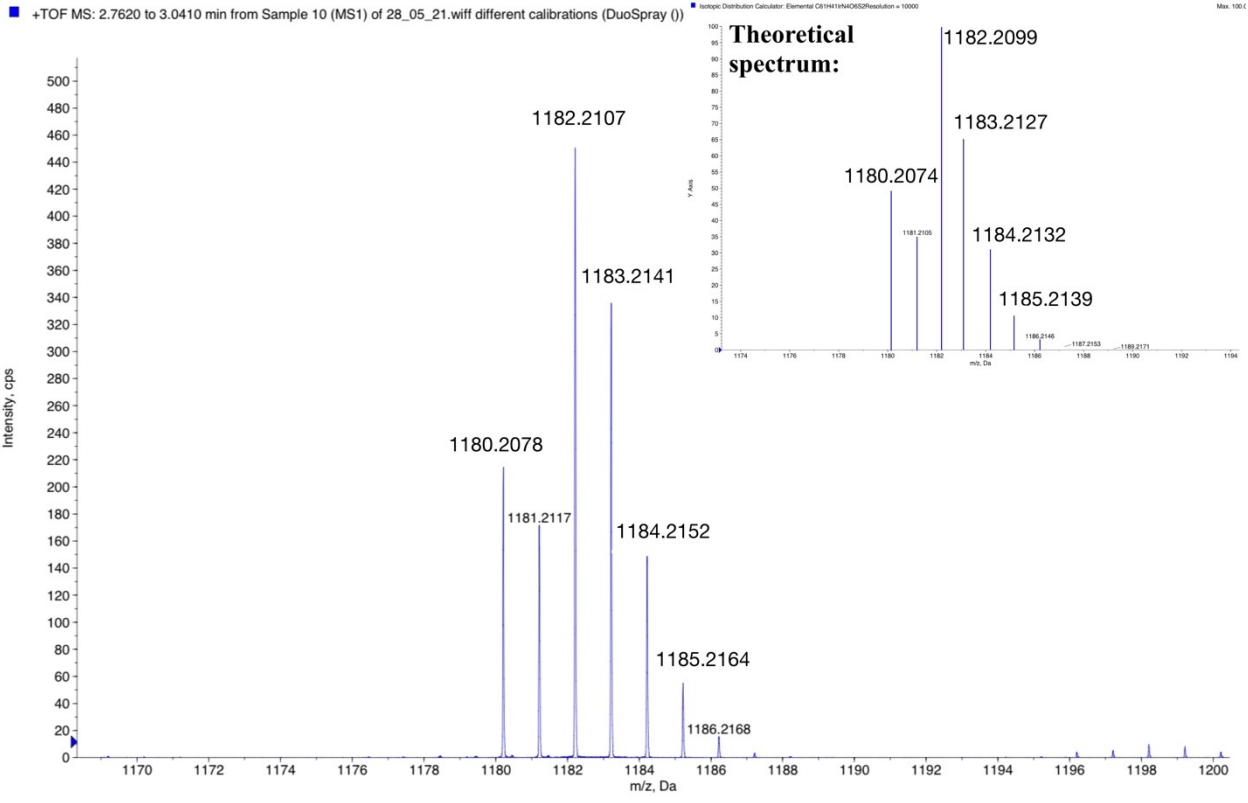

Figure S51. High resolution mass spectrum of **9**.

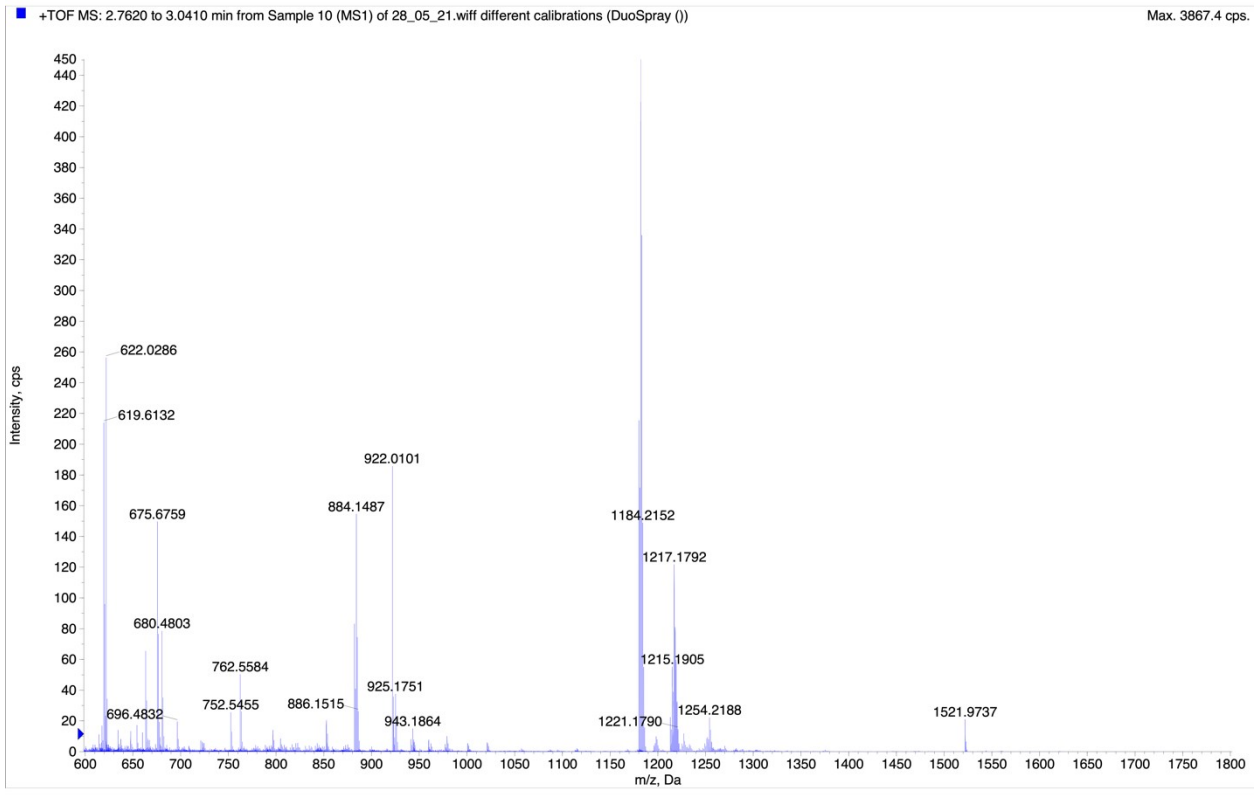

Figure S52. High resolution mass spectrum of **9**.

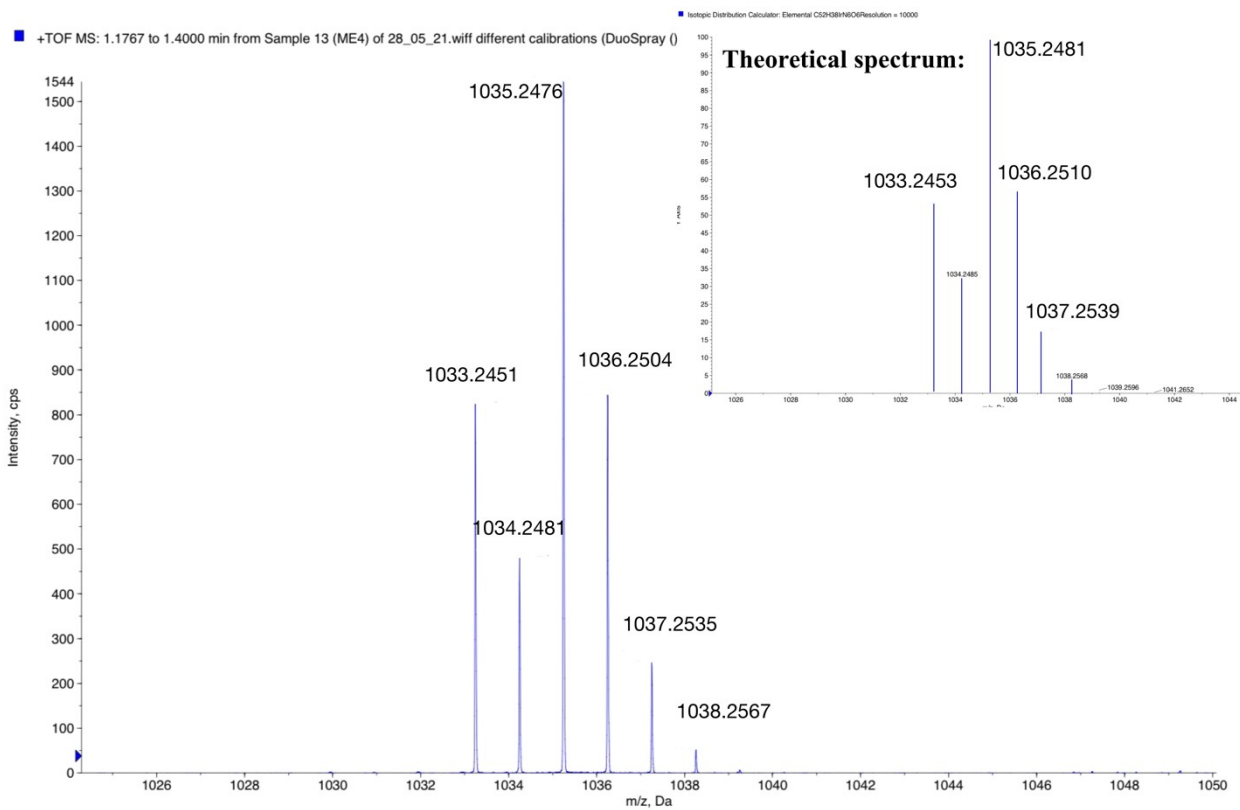

Figure S53. High resolution mass spectrum of **10**.

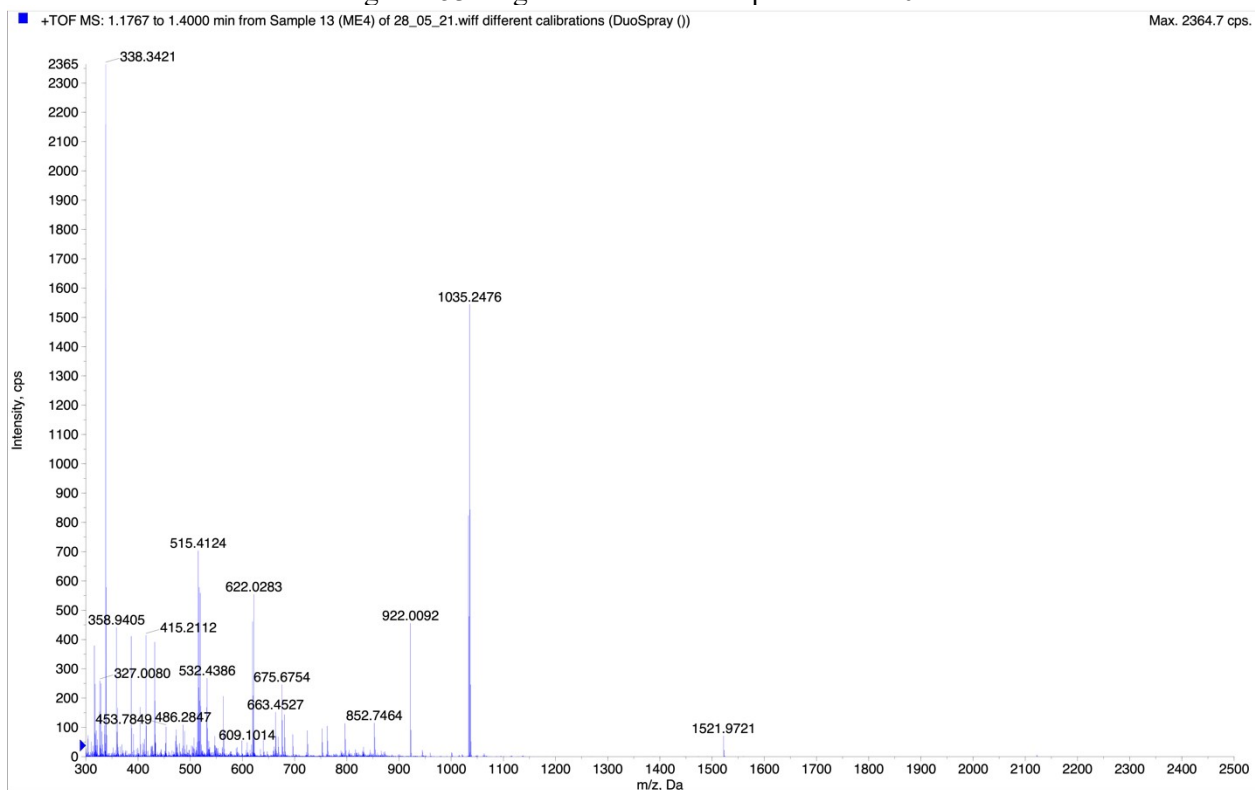

Figure S54. High resolution mass spectrum of **10**.

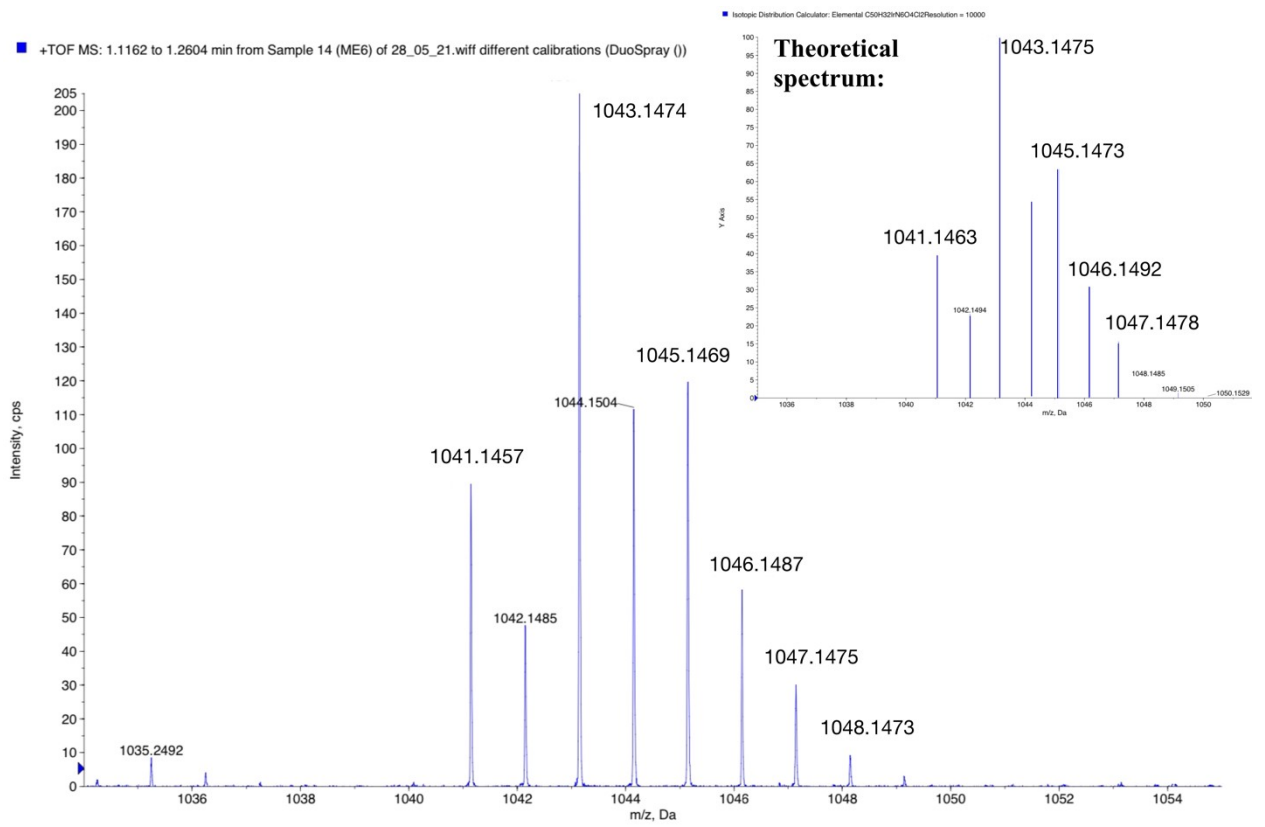

Figure S55. High resolution mass spectrum of **11**.

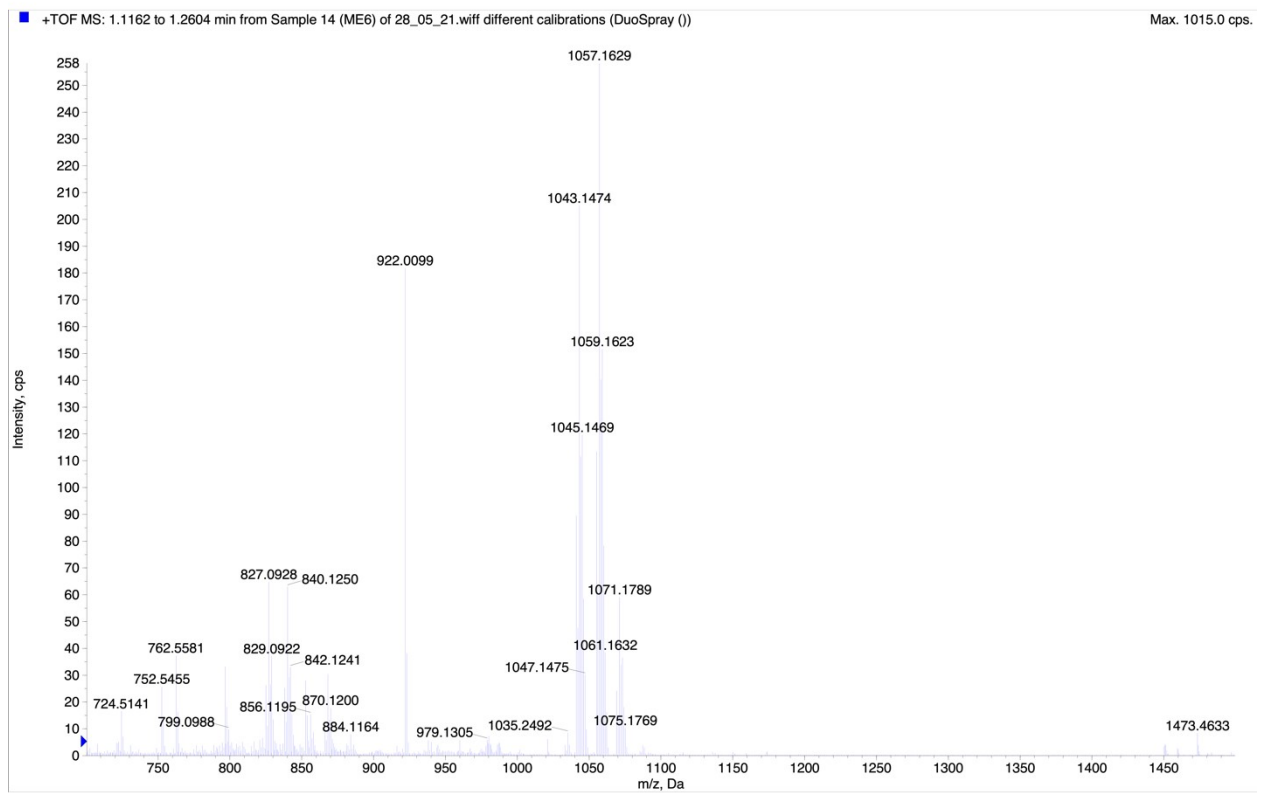

Figure S56. High resolution mass spectrum of **11**.

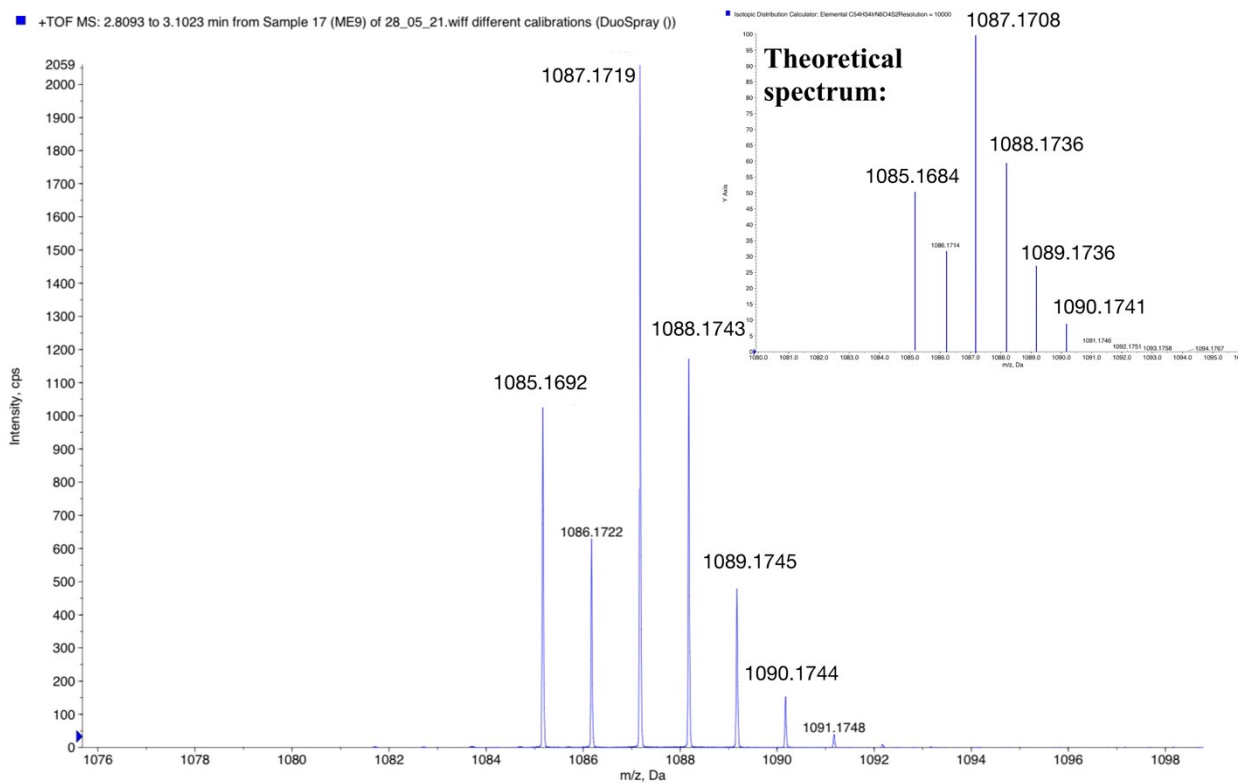

Figure S57. High resolution mass spectrum of **12**.

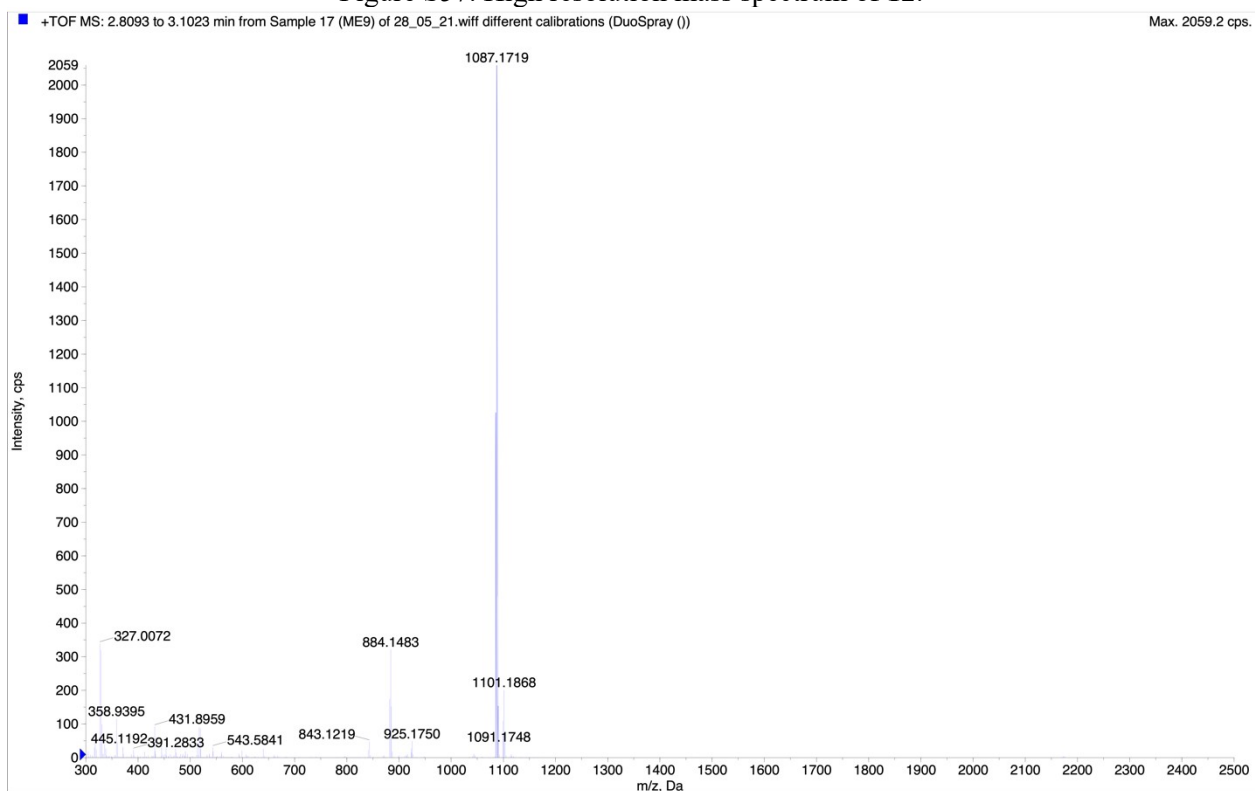

Figure S58. High resolution mass spectrum of **12**.

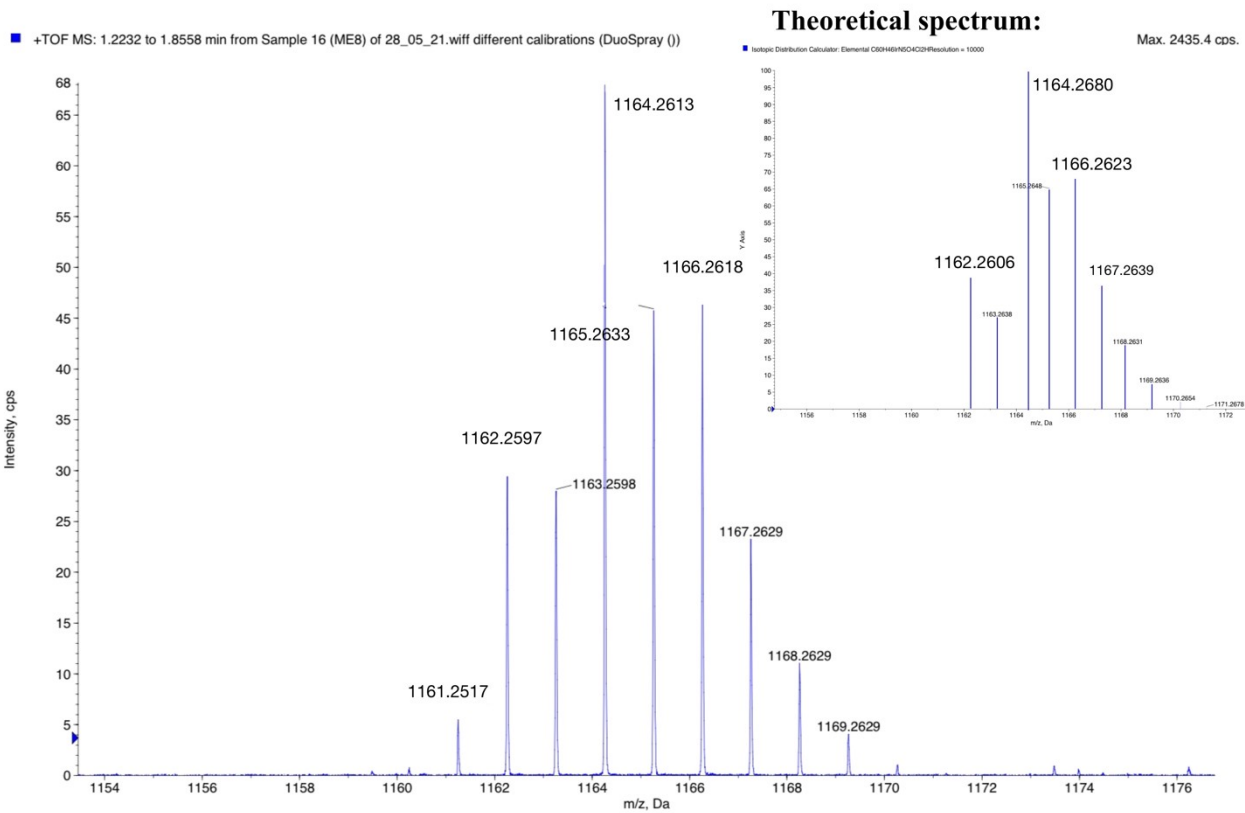

Figure S59. High resolution mass spectrum of **13**.

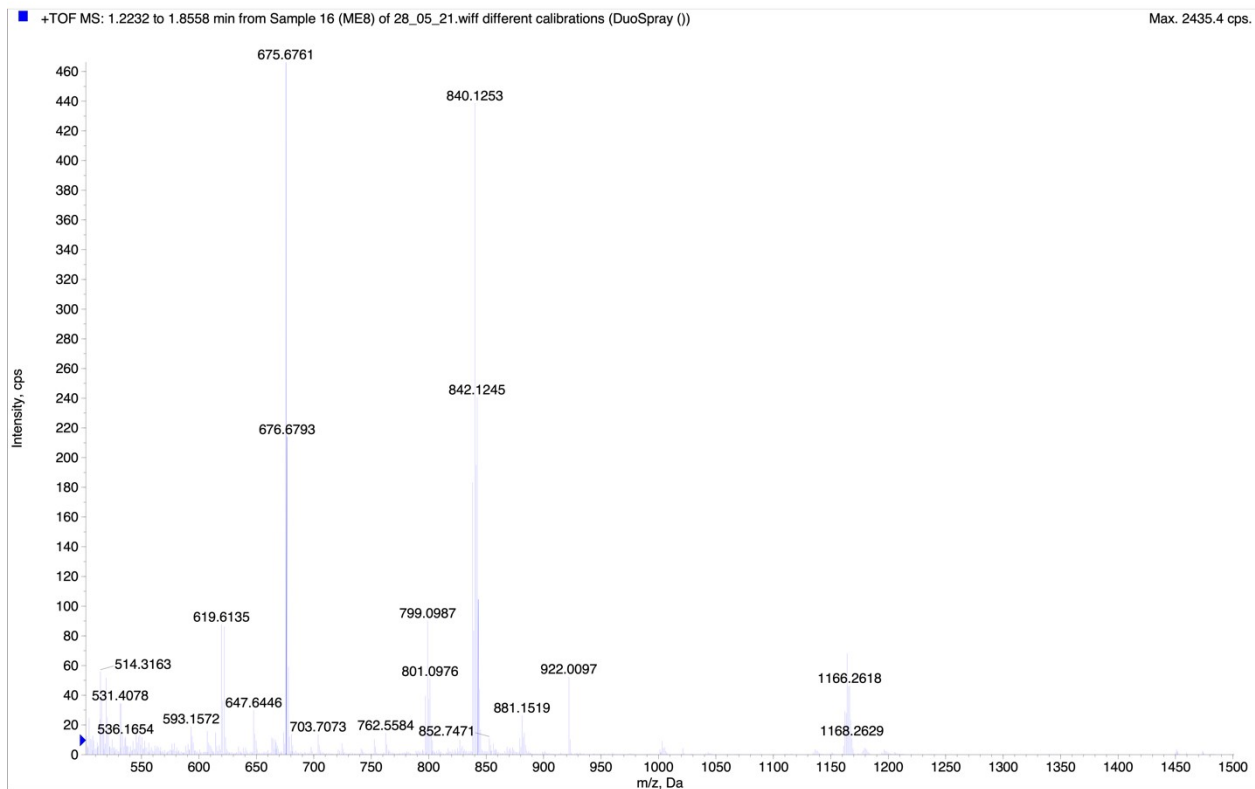

Figure S60. High resolution mass spectrum of **13**.



## 2. X-ray data.

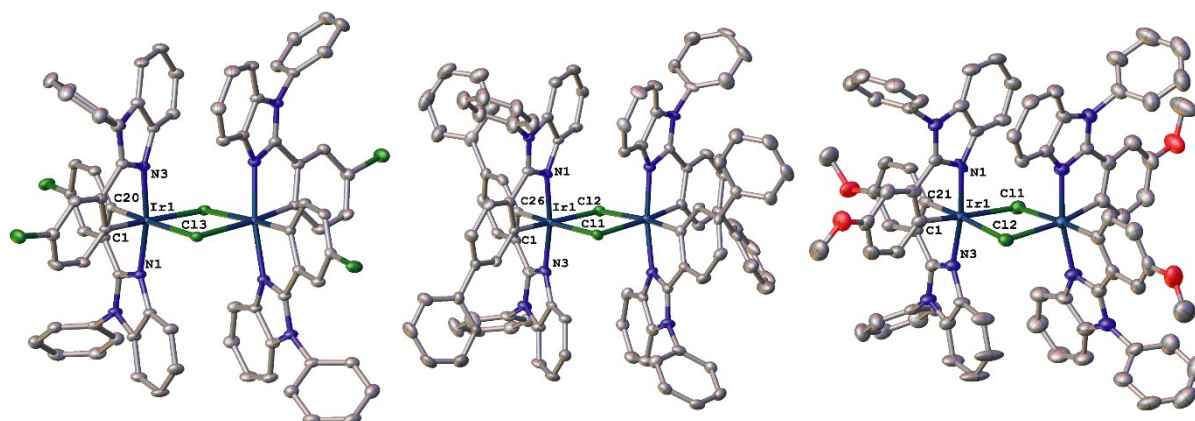

$[\text{Ir}(\text{3cbi})_2\text{Cl}]_2$

$[\text{Ir}(\text{dpbi})_2\text{Cl}]_2$

$[\text{Ir}(\text{3mbi})_2\text{Cl}]_2$

Figure S61. Molecular structures of the chloride dimers. Displacement ellipsoids are shown at 50% probability level. Minor components of disordered groups and hydrogen atoms are not shown.

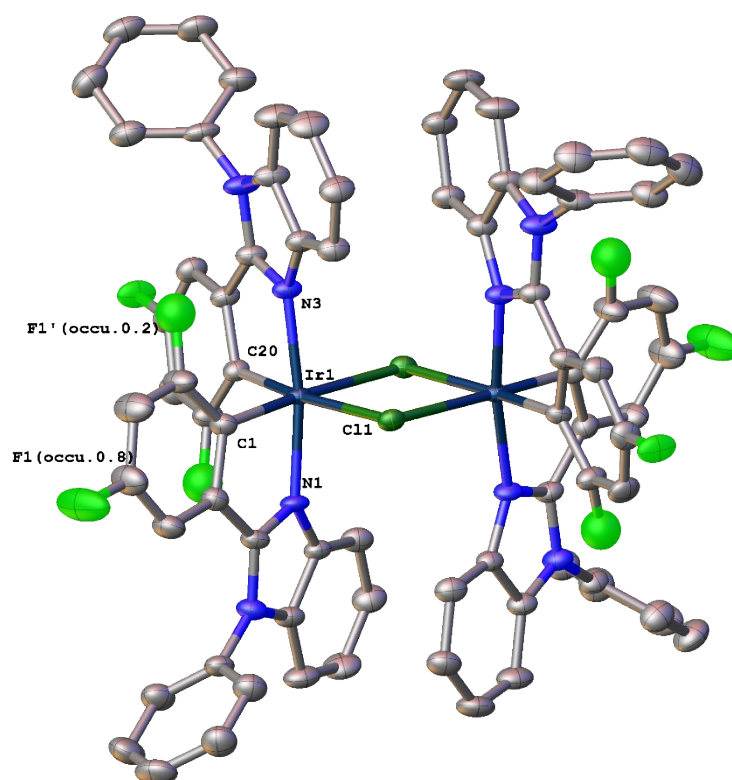

Figure S62. Molecular structure of the  $[\text{Ir}(\text{3fbi})_2\text{Cl}]_2$ . Displacement ellipsoids are shown at 50% probability level. The hydrogen atoms are not shown. Both fluorine components are shown with their relative occupancies.

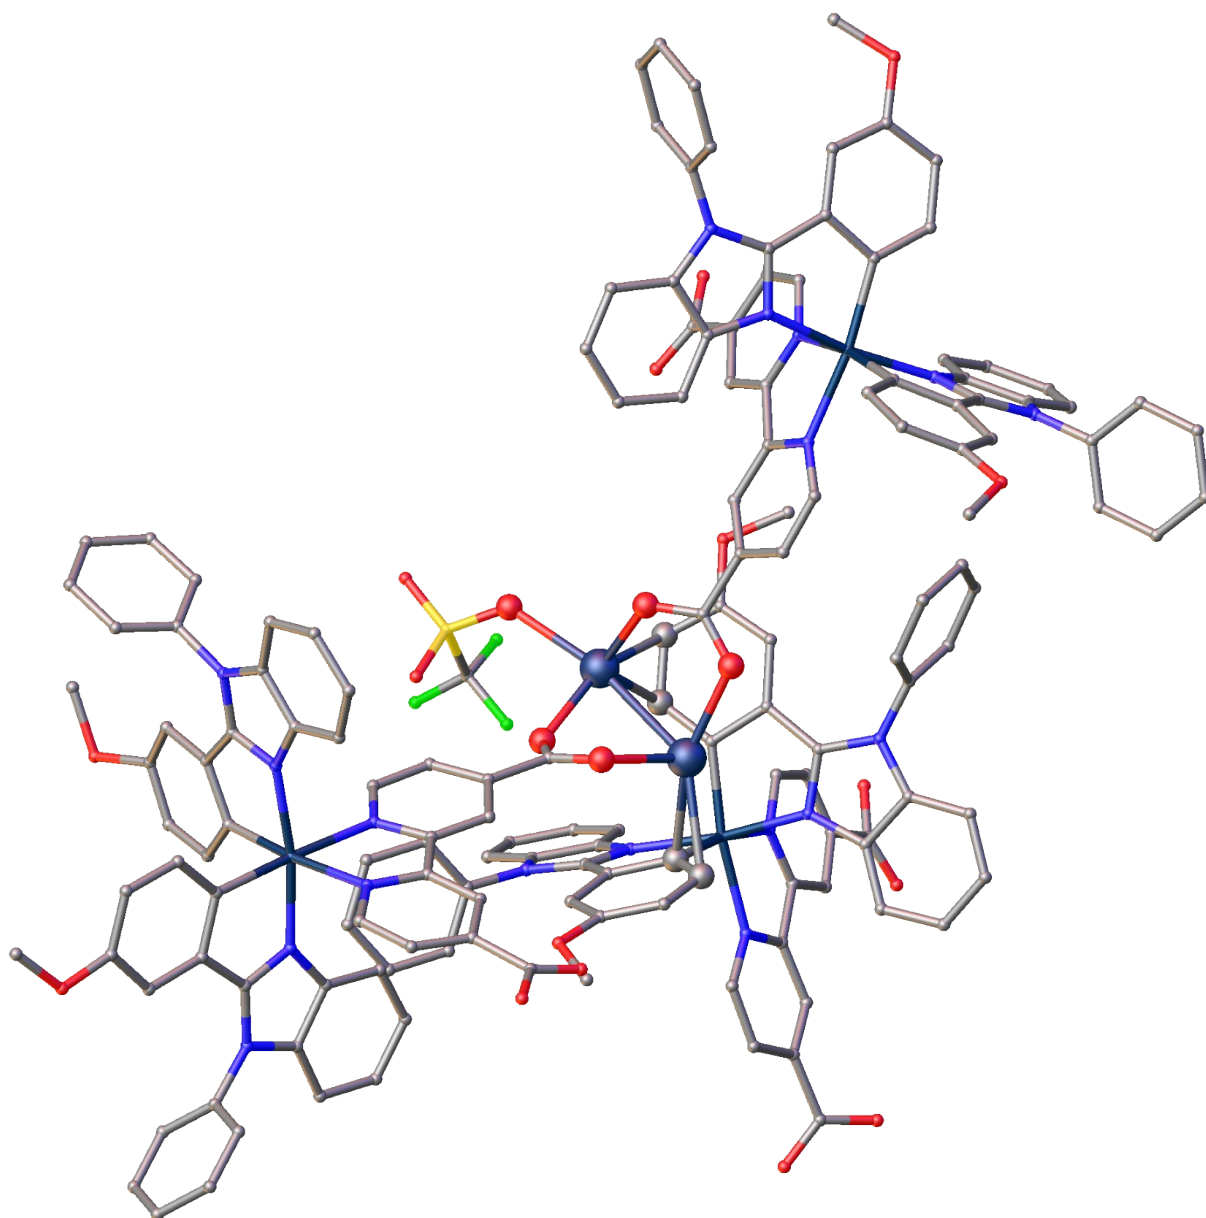

Figure S63. Coordination environment of the silver ions in the Ir<sub>2</sub>Ag<sub>2</sub> structure.

Table S2. Details of the X-ray crystal data collection and structure refinement for dimeric compounds

|                                                     | [Ir(3cbi) <sub>2</sub> Cl] <sub>2</sub>                                                                               | [Ir(dpbi) <sub>2</sub> Cl] <sub>2</sub>                                                     | [Ir(3mbi) <sub>2</sub> Cl] <sub>2</sub>                                                                                | [Ir(3fbi) <sub>2</sub> Cl] <sub>2</sub>                                                                                 |
|-----------------------------------------------------|-----------------------------------------------------------------------------------------------------------------------|---------------------------------------------------------------------------------------------|------------------------------------------------------------------------------------------------------------------------|-------------------------------------------------------------------------------------------------------------------------|
| Empirical formula                                   | C <sub>80</sub> H <sub>56</sub> Cl <sub>14</sub> Ir <sub>2</sub> N <sub>8</sub><br>+ 4CH <sub>2</sub> Cl <sub>2</sub> | C <sub>100</sub> H <sub>68</sub> Cl <sub>2</sub> Ir <sub>2</sub> N <sub>8</sub><br>+solvent | C <sub>81</sub> H <sub>64</sub> Cl <sub>2</sub> Ir <sub>2</sub> N <sub>8</sub> O <sub>5</sub><br>+1 CH <sub>3</sub> OH | C <sub>80</sub> H <sub>52</sub> Cl <sub>14</sub> F <sub>4</sub> Ir <sub>2</sub> N <sub>8</sub><br>+ 4 CHCl <sub>3</sub> |
| M <sub>w</sub>                                      | 2010.03                                                                                                               | 1989.79                                                                                     | 1684.70                                                                                                                | 2081.99                                                                                                                 |
| Temperature (K)                                     | 100                                                                                                                   | 100                                                                                         | 296.15                                                                                                                 | 150                                                                                                                     |
| Size (mm)                                           | 0.30 x 0.27 x 0.04                                                                                                    | 0.4 × 0.38 × 0.08                                                                           | 0.20 × 0.12 × 0.07                                                                                                     | 0.15 × 0.15 × 0.10                                                                                                      |
| Cryst. system                                       | monoclinic                                                                                                            | triclinic                                                                                   | monoclinic                                                                                                             | monoclinic                                                                                                              |
| Space group                                         | C2/c                                                                                                                  | P-1                                                                                         | P2 <sub>1</sub> /n                                                                                                     | C2/c                                                                                                                    |
| <i>a</i> (Å)                                        | 21.0487(9)                                                                                                            | 13.0955(3)                                                                                  | 20.4452(6)                                                                                                             | 20.4091(8)                                                                                                              |
| <i>b</i> (Å)                                        | 15.2627(6)                                                                                                            | 19.1698(6)                                                                                  | 15.2416(4)                                                                                                             | 15.0372(5)                                                                                                              |
| <i>c</i> (Å)                                        | 23.7169(10)                                                                                                           | 19.3990(5)                                                                                  | 23.5774(7)                                                                                                             | 25.0183(11)                                                                                                             |
| <i>α</i> (°)                                        | 90.00                                                                                                                 | 103.9670(10)                                                                                | 90.00                                                                                                                  | 90.00                                                                                                                   |
| <i>β</i> (°)                                        | 98.824(2)                                                                                                             | 93.2770(10)                                                                                 | 108.1450(10)                                                                                                           | 99.107                                                                                                                  |
| <i>γ</i> (°)                                        | 90.00                                                                                                                 | 101.9530(10)                                                                                | 90.00                                                                                                                  | 90.00                                                                                                                   |
| <i>V</i> (Å <sup>3</sup> )                          | 7529.1(5)                                                                                                             | 4593.9(2)                                                                                   | 6981.8(3)                                                                                                              | 7581.2(5)                                                                                                               |
| <i>Z</i>                                            | 4                                                                                                                     | 2                                                                                           | 4                                                                                                                      | 4                                                                                                                       |
| <i>ρ</i> <sub>calcd</sub> (g·cm <sup>-3</sup> )     | 1.773                                                                                                                 | 1.438                                                                                       | 1.603                                                                                                                  | 1.824                                                                                                                   |
| Abs coeff (mm <sup>-1</sup> )                       | 4.080                                                                                                                 | 3.107                                                                                       | 3.944                                                                                                                  | 4.063                                                                                                                   |
| <i>F</i> (000)                                      | 3936.0                                                                                                                | 1975.0                                                                                      | 3336.0                                                                                                                 | 4064.0                                                                                                                  |
| <i>θ</i> range (deg)                                | 4.58 < <i>θ</i> < 61.1                                                                                                | 3.662 < <i>θ</i> < 52                                                                       | 3.232 < <i>θ</i> < 50.1                                                                                                | 3.898 < <i>θ</i> < 57.398                                                                                               |
| no. of collected/unique rflns                       | 70680/11449                                                                                                           | 30399/17642                                                                                 | 52970/ 12349                                                                                                           | 40903/ 9781                                                                                                             |
| Completeness to <i>θ</i> (%)                        | 99.2                                                                                                                  | 97.7                                                                                        | 99.9                                                                                                                   | 100                                                                                                                     |
| no. of data/restraints/params                       | 11449/0/469                                                                                                           | 17642/14/1031                                                                               | 12349/1/903                                                                                                            | 9781/6/501                                                                                                              |
| Goodness of fit on <i>F</i> <sup>2</sup>            | 1.028                                                                                                                 | 1.022                                                                                       | 1.026                                                                                                                  | 1.041                                                                                                                   |
| Final <i>R</i> indices ( <i>I</i> > 2σ( <i>I</i> )) | R <sub>1</sub> = 0.0308,<br>wR <sub>2</sub> = 0.0645                                                                  | R <sub>1</sub> = 0.0416,<br>wR <sub>2</sub> = 0.0951                                        | R <sub>1</sub> = 0.0372,<br>wR <sub>2</sub> = 0.0917                                                                   | R <sub>1</sub> = 0.0406,<br>wR <sub>2</sub> = 0.1014                                                                    |
| <i>R</i> indices (all data)                         | R <sub>1</sub> = 0.0424,<br>wR <sub>2</sub> = 0.0681                                                                  | R <sub>1</sub> = 0.0607,<br>wR <sub>2</sub> = 0.1013                                        | R <sub>1</sub> = 0.0536,<br>wR <sub>2</sub> = 0.1000                                                                   | R <sub>1</sub> = 0.0536,<br>wR <sub>2</sub> = 0.1092                                                                    |
| Largest diff peak/hole (e/Å <sup>3</sup> )          | 1.89/-1.41                                                                                                            | 1.87/-1.59                                                                                  | 1.80/-1.48                                                                                                             | 1.62/-1.73                                                                                                              |

Table S3. Details of the X-ray crystal data collection and structure refinement for complexes 1, 2, 5, 7-10, 12, 13

|                                            | 1                                       | 2                             | 5                                                       | 7                                   | 8                                       | 9                                      | 10                             | 12                             | 13                             |
|--------------------------------------------|-----------------------------------------|-------------------------------|---------------------------------------------------------|-------------------------------------|-----------------------------------------|----------------------------------------|--------------------------------|--------------------------------|--------------------------------|
| Empirical formula                          | $C_{53}H_{35}F_2IrN_4O_4S$<br>+ solvent | $C_{53}H_{35}Cl_2IrN_4O_4S$   | $C_{55}H_{35}F_6IrN_4O_4S$<br>+ $CH_2Cl_2/$<br>$CH_3OH$ | $C_{59}H_{45}N_4O_8Ir$<br>+ solvent | $C_{57}H_{39}Cl_2IrN_4O_6$<br>+ solvent | $C_{61}H_{41}IrN_4O_6S_2$<br>+ solvent | $[C_{52}H_{37}IrN_6O_6]OTf$    | $[C_{54}H_{36}IrN_6O_4S_2]OTf$ | $C_{60}H_{46}Cl_2IrN_5O_4$     |
| $M_w$                                      | 1054.11                                 | 1087.01                       | 1212.61                                                 | 1130.19                             | 1139.02                                 | 1182.30                                | 1109.11                        | 866.52                         | 1164.12                        |
| Temperature (K)                            | 100.00                                  | 100.00                        | 100.00                                                  | 200.00                              | 150.00                                  | 100.15                                 | 150.00                         | 150.00                         | 100.00                         |
| Size (mm)                                  | $0.14 \times 0.12 \times$<br>$0.005$    | $0.1 \times 0.1 \times 0.004$ | $0.22 \times 0.20 \times$<br>$0.11$                     | $0.42 \times 0.28 \times$<br>$0.20$ | $0.35 \times 0.30 \times$<br>$0.30$     | $0.2 \times 0.03 \times$<br>$0.003$    | $0.25 \times 0.22 \times 0.05$ | $0.30 \times 0.30 \times 0.07$ | $0.45 \times 0.40 \times 0.25$ |
| Cryst. system                              | monoclinic                              | monoclinic                    | triclinic                                               | orthorhombic                        | orthorhombic                            | triclinic                              | triclinic                      | triclinic                      | triclinic                      |
| Space group                                | $P2_1/n$                                | $P2_1/n$                      | P-1                                                     | $Pnc2$                              | $Pbcn$                                  | P-1                                    | P-1                            | P-1                            | P-1                            |
| $a$ (Å)                                    | 11.3870(9)                              | 13.2139(5)                    | 11.6380(3)                                              | 29.2455(14)                         | 13.7388(5)                              | 12.7102(7)                             | 15.1677(14)                    | 20.2850(8)                     | 12.8762(11)                    |
| $b$ (Å)                                    | 22.3107(18)                             | 24.0162(16)                   | 12.0786(4)                                              | 13.7868(7)                          | 12.7766(5)                              | 14.9577(8)                             | 17.1131(17)                    | 21.1480(8)                     | 12.9389(11)                    |
| $c$ (Å)                                    | 18.4099(14)                             | 13.8114(8)                    | 18.5157(5)                                              | 12.7980(6)                          | 28.3069(9)                              | 15.6155(8)                             | 20.8414(18)                    | 28.2673(11)                    | 15.9754(15)                    |
| $\alpha$ (°)                               | 90.00                                   | 90.00                         | 91.2080(10)                                             | 90.00                               | 90.00                                   | 115.4936(19)                           | 69.915(3)                      | 80.1990(10)                    | 80.087(3)                      |
| $\beta$ (°)                                | 102.871(3)                              | 90.525(2)                     | 96.2940(10)                                             | 90.00                               | 90.00                                   | 104.484(2)                             | 80.152(3)                      | 71.5230(10)                    | 89.178(3)                      |
| $\gamma$ (°)                               | 90.00                                   | 90.00                         | 100.4940(10)                                            | 90.00                               | 90.00                                   | 100.722(2)                             | 72.408(4)                      | 81.6440(10)                    | 69.118(3)                      |
| $V$ (Å <sup>3</sup> )                      | 4559.6(6)                               | 4382.8(4)                     | 2541.56(13)                                             | 5160.2(4)                           | 4968.9(3)                               | 2443.6(2)                              | 4829.4(8)                      | 11279.1(8)                     | 2446.4(4)                      |
| $Z$                                        | 4                                       | 4                             | 2                                                       | 4                                   | 4                                       | 2                                      | 4                              | 8                              | 2                              |
| $\rho_{\text{cald}}$ (g·cm <sup>-3</sup> ) | 1.536                                   | 1.647                         | 1.585                                                   | 1.455                               | 1.523                                   | 1.607                                  | 1.525                          | 1.531                          | 1.580                          |
| Abs coeff (mm <sup>-1</sup> )              | 3.033                                   | 3.270                         | 2.794                                                   | 2.647                               | 2.850                                   | 2.878                                  | 2.852                          | 2.525                          | 2.894                          |
| $F(000)$                                   | 2096.0                                  | 2160.0                        | 1204.0                                                  | 2272.0                              | 2272.0                                  | 1184.0                                 | 2212.0                         | 5210.0                         | 1168.0                         |

|                                             |                                     |                                     |                                     |                                     |                                     |                                     |                                     |                                     |                                     |
|---------------------------------------------|-------------------------------------|-------------------------------------|-------------------------------------|-------------------------------------|-------------------------------------|-------------------------------------|-------------------------------------|-------------------------------------|-------------------------------------|
| $\theta$ range (deg)                        | 2.912 < $\theta$ < 52.81            | 3.402 < $\theta$ < 51.406           | 3.99 < $\theta$ < 52.774            | 3.266 < $\theta$ < 50.096           | 4.132 < $\theta$ < 52.79            | 4.66 < $\theta$ < 53.996            | 3.312 < $\theta$ < 50.098           | 2.676 < $\theta$ < 55.998           | 3.856 < $\theta$ < 52.762           |
| no. of collected/unique rflns               | 47812/9340                          | 8346/8297                           | 53682/10384                         | 82138/9157                          | 49989/5089                          | 21603/10623                         | 40635/16932                         | 163620/54411                        | 39476/9973                          |
| Completeness to $\theta$ (%)                | 99.9                                | 99.4                                | 99.8                                | 100                                 | 99.9                                | 99.9                                | 99.9                                | 99.9                                | 99.6                                |
| no. of data/restraints/params               | 9340/2/590                          | 8297/257/592                        | 10384/61/584                        | 9157/200/643                        | 5089/0/318                          | 10623/193/755                       | 16932/39/1280                       | 54411/62/2900                       | 9973/1/614                          |
| Goodness of fit on $F^2$                    | 1.080                               | 1.141                               | 1.154                               | 1.086                               | 1.063                               | 1.014                               | 1.035                               | 1.020                               | 1.050                               |
| Final $R$ indices ( $I > 2\sigma(I)$ )      | $R_1 = 0.0469$ ,<br>$wR_2 = 0.1074$ | $R_1 = 0.0649$ ,<br>$wR_2 = 0.1562$ | $R_1 = 0.0450$ ,<br>$wR_2 = 0.1164$ | $R_1 = 0.0308$ ,<br>$wR_2 = 0.0747$ | $R_1 = 0.0239$ ,<br>$wR_2 = 0.0522$ | $R_1 = 0.0441$ ,<br>$wR_2 = 0.0761$ | $R_1 = 0.0556$ ,<br>$wR_2 = 0.1134$ | $R_1 = 0.0373$ ,<br>$wR_2 = 0.0723$ | $R_1 = 0.0392$ ,<br>$wR_2 = 0.0824$ |
| $R$ indices (all data)                      | $R_1 = 0.0659$ ,<br>$wR_2 = 0.1161$ | $R_1 = 0.0797$ ,<br>$wR_2 = 0.1636$ | $R_1 = 0.0477$ ,<br>$wR_2 = 0.1179$ | $R_1 = 0.0521$ ,<br>$wR_2 = 0.0881$ | $R_1 = 0.0341$ ,<br>$wR_2 = 0.0561$ | $R_1 = 0.0659$ ,<br>$wR_2 = 0.0837$ | $R_1 = 0.0962$ ,<br>$wR_2 = 0.1281$ | $R_1 = 0.0558$ ,<br>$wR_2 = 0.0780$ | $R_1 = 0.0529$ , $wR_2 = 0.0883$    |
| Largest diff peak/hole ( $e/\text{\AA}^3$ ) | 2.23/-1.69                          | 3.05/-2.27                          | 2.16/-1.42                          | 1.69/-0.82                          | 0.89/-1.16                          | 0.96/-1.26                          | 1.93/-1.48                          | 1.97/-0.74                          | 0.80/-0.95                          |

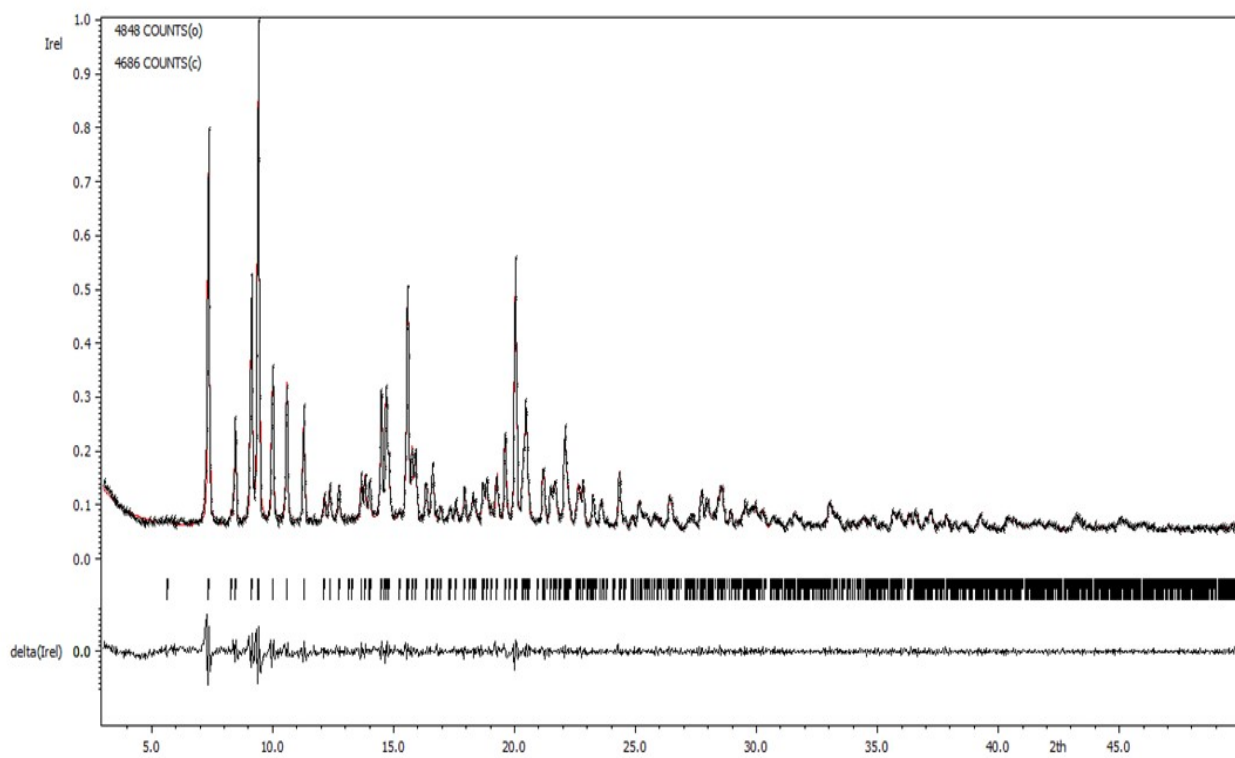

Figure S64. Powder XRD pattern of complex **13** (black line) with the simulated pattern (red line). The differential is presented in the bottom.

### 3. Redox and optical properties.

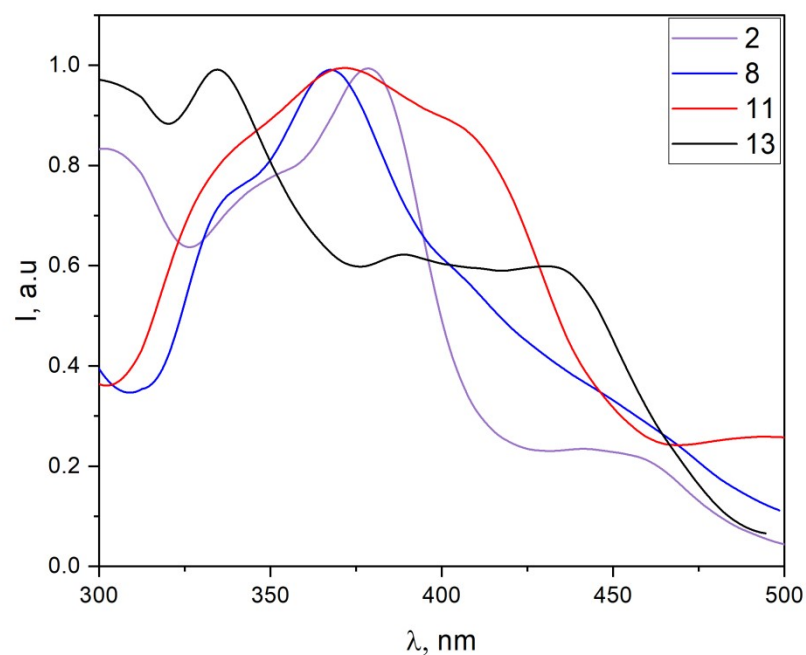

Figure S65. Normalised excitation spectra of complexes **2**, **8**, **11**, **13** with 3cbi as cyclometalated ligand measured under Ar atmosphere in  $\text{CH}_2\text{Cl}_2$  at  $25^\circ\text{C}$

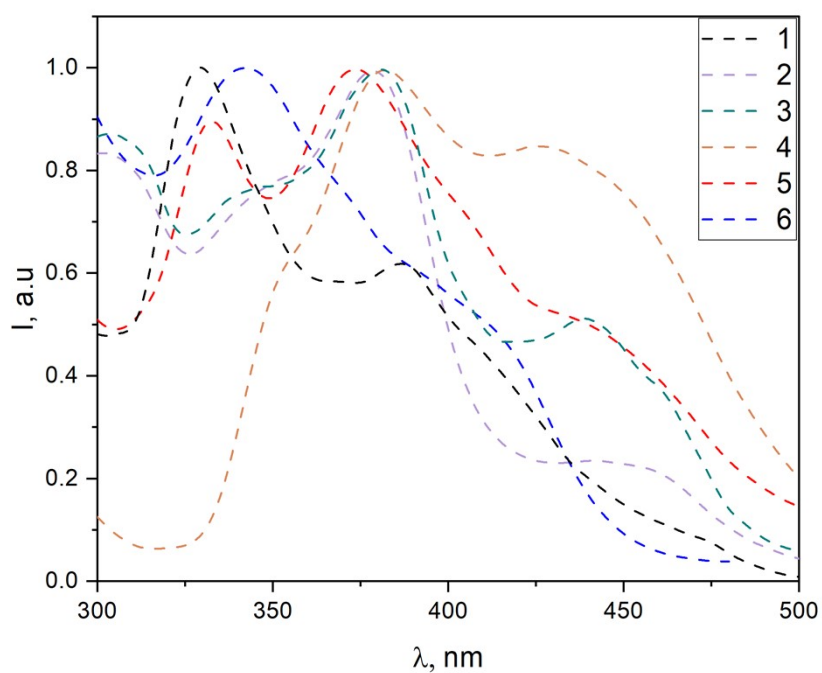

Figure S66. Normalised excitation spectra of complexes **1-6** with  $L_1$  as ancillary ligand measured under Ar atmosphere in  $\text{CH}_2\text{Cl}_2$  at  $25^\circ\text{C}$

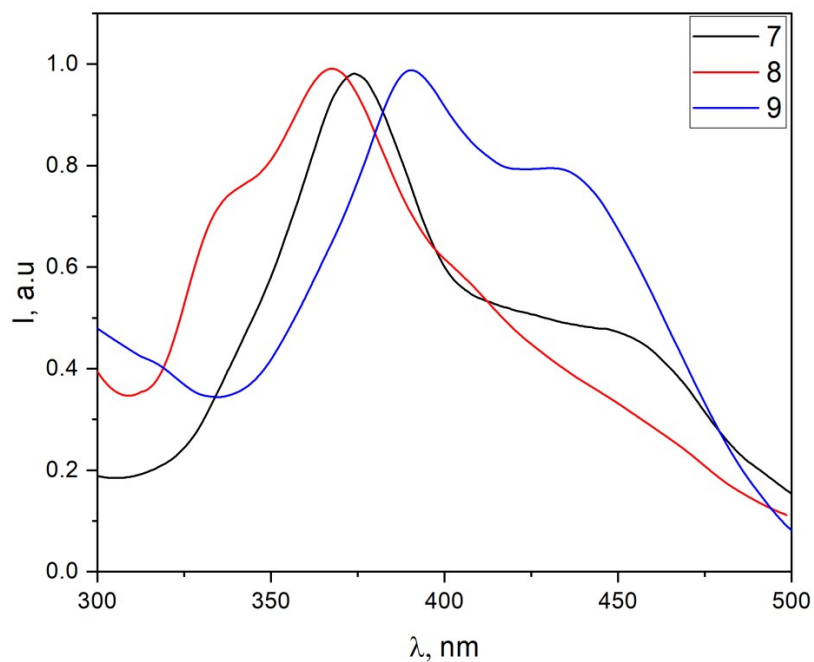

Figure S67. Normalised excitation spectra of complexes **7-9** with  $L_2$  as ancillary ligand measured under Ar atmosphere in  $CH_2Cl_2$  at  $25^\circ C$

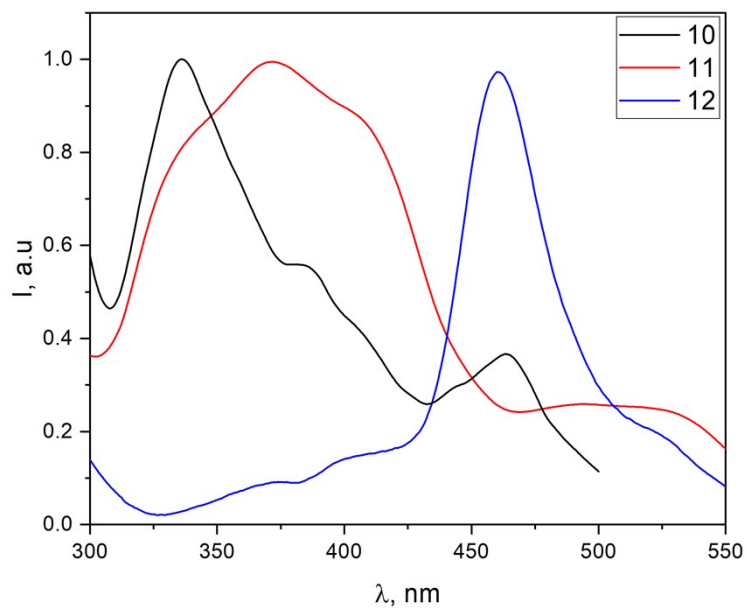

Figure S68. Normalised excitation spectra of complexes **10-12** with  $L_3$  as ancillary ligand measured under Ar atmosphere in  $CH_2Cl_2$  with 0,01M  $CF_3COOH$  at  $25^\circ C$



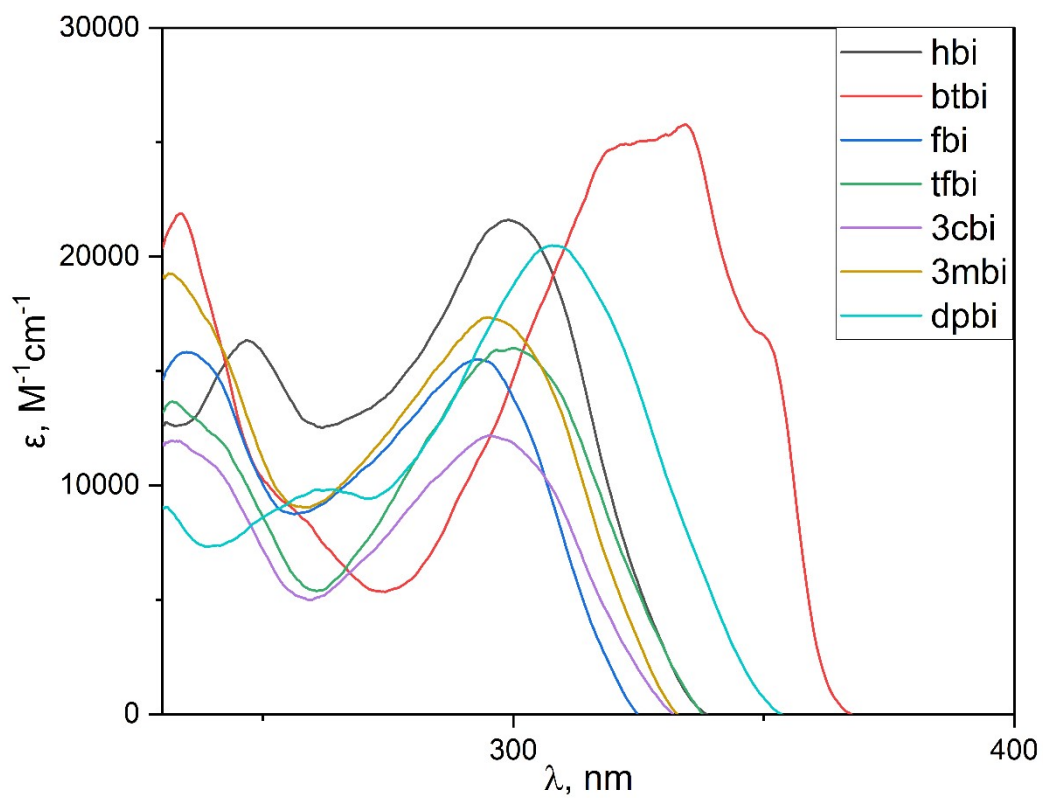

Figure S69. Absorption spectra of cyclometalating benzimidazole ligands ( $\text{CH}_2\text{Cl}_2$ ).

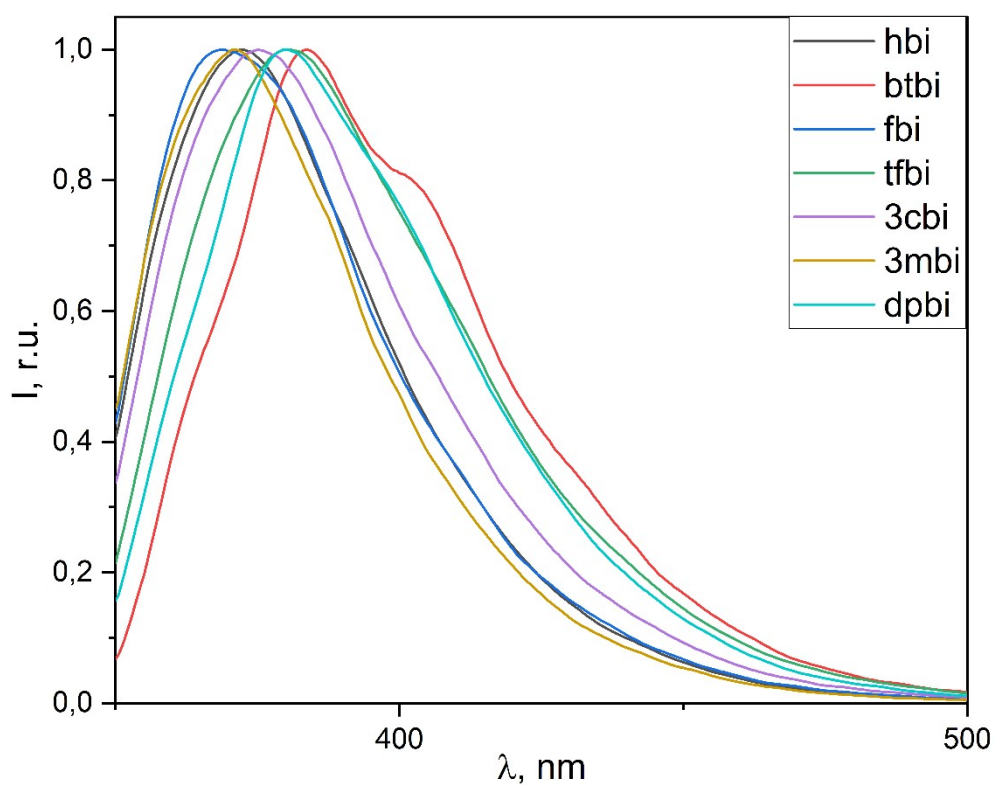

Figure S70. Normalised luminescence spectra of cyclometalating benzimidazole ligands ( $\text{CH}_2\text{Cl}_2$ ).

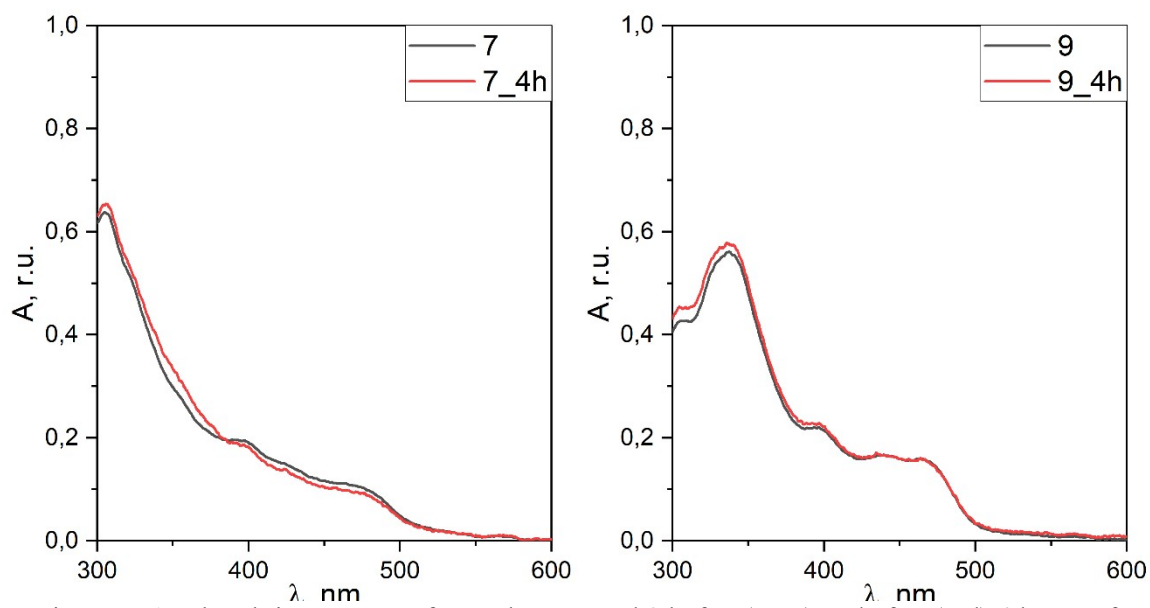

Figure S71. Absorbtion spectra of complexes 7 and 9 before(grey) and after (red) 4 hours of UV irradiation.

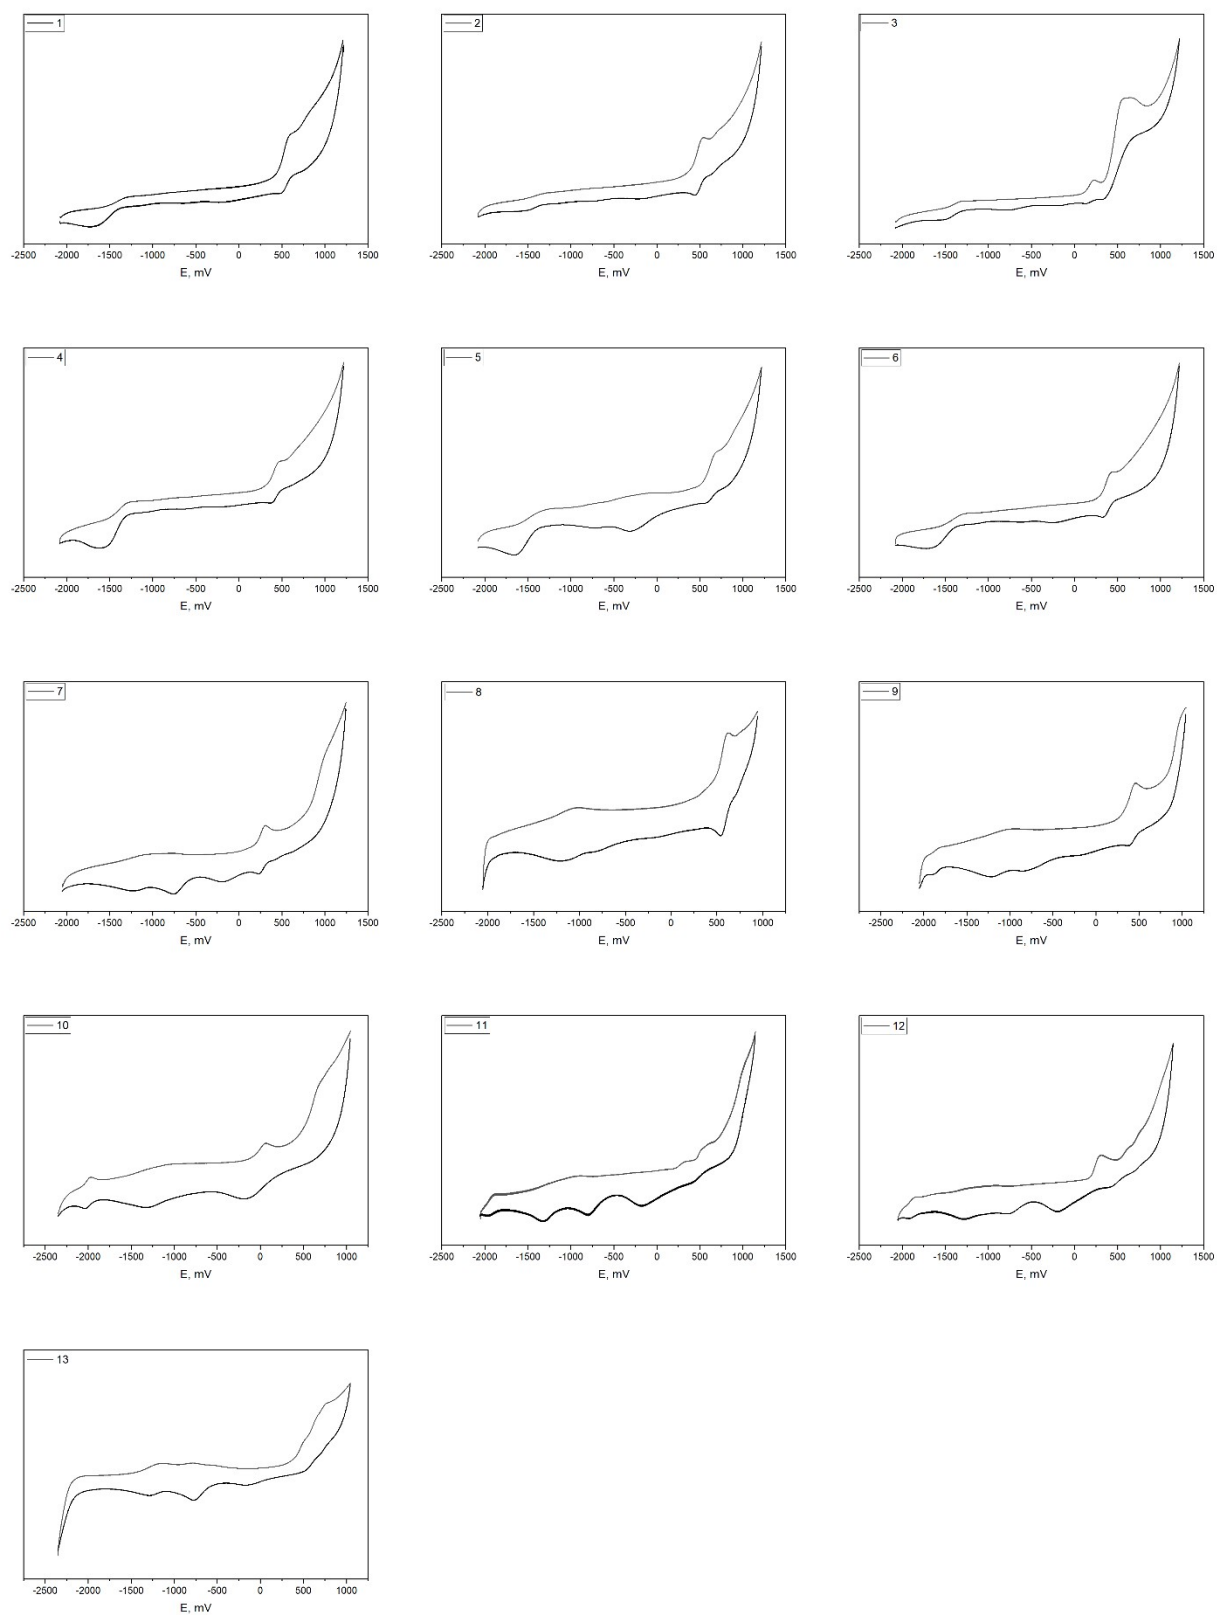

Figure S72. Cyclic voltammetry curves of complexes **1** – **13**. E is presented vs  $\text{Fc}^+/\text{Fc}$  couple.

#### 4. Computational details

Table S4. Comparison of the bond lengths from the crystal structures and the calculations  
(structure/calculation)

|         | <b>1</b>       | <b>2</b>       | <b>5</b>       | <b>7</b>       | <b>8</b>       | <b>9</b>     | <b>13</b>      |
|---------|----------------|----------------|----------------|----------------|----------------|--------------|----------------|
| Ir – C1 | 1.997 / 2.0173 | 1.986 / 2.0144 | 1.989 / 2.0188 | 1.971 / 2.0163 | 1.998 / 2.0115 | 2.001/2.0231 | 1.993 / 2.0182 |
| Ir – C2 | 2.003 / 2.0109 | 1.990 / 2.0145 | 2.000 / 2.0120 | 1.971 / 2.0164 | 1.998 / 2.0115 | 1.997/2.0207 | 1.998 / 2.0140 |
| Ir – N1 | 2.028 / 2.0810 | 2.042 / 2.0722 | 2.023 / 2.0714 | 2.040 / 2.0677 | 2.045 / 2.0630 | 2.028/2.0818 | 2.039 / 2.0802 |
| Ir – N2 | 2.043 / 2.0619 | 2.046 / 2.0732 | 2.033 / 2.0660 | 2.040 / 2.0675 | 2.045 / 2.0632 | 2.054/2.0858 | 2.030 / 2.0738 |
| Ir – O1 | 2.152 / 2.2175 | 2.140 / 2.1866 | 2.112 / 2.1824 | 2.133 / 2.1940 | 2.145 / 2.1745 | 2.108/2.1731 | 2.119 / 2.1925 |
| Ir – O2 | 2.121 / 2.1732 | 2.152 / 2.1915 | 2.130 / 2.1889 | 2.133 / 2.1925 | 2.145 / 2.1745 | 2.154/2.1750 | 2.133 / 2.1774 |

Table S5. Comparison of the bond lengths from the crystal structures and the calculations  
(structure/calculation)

\*for the complexes **10** and **12** data for one on the molecules in the independent unit is shown.

|         | <b>10*</b>   | <b>12*</b>     |
|---------|--------------|----------------|
| Ir – C1 | 2.001/2.0359 | 2.027 / 2.0496 |
| Ir – C2 | 2.031/2.0390 | 2.042 / 2.0463 |
| Ir – N1 | 2.043/2.0893 | 2.044 / 2.1042 |
| Ir – N2 | 2.046/2.0874 | 2.065 / 2.0990 |
| Ir – N3 | 2.113/2.2078 | 2.121 / 2.1980 |
| Ir – N4 | 2.141/2.2095 | 2.102 / 2.1988 |

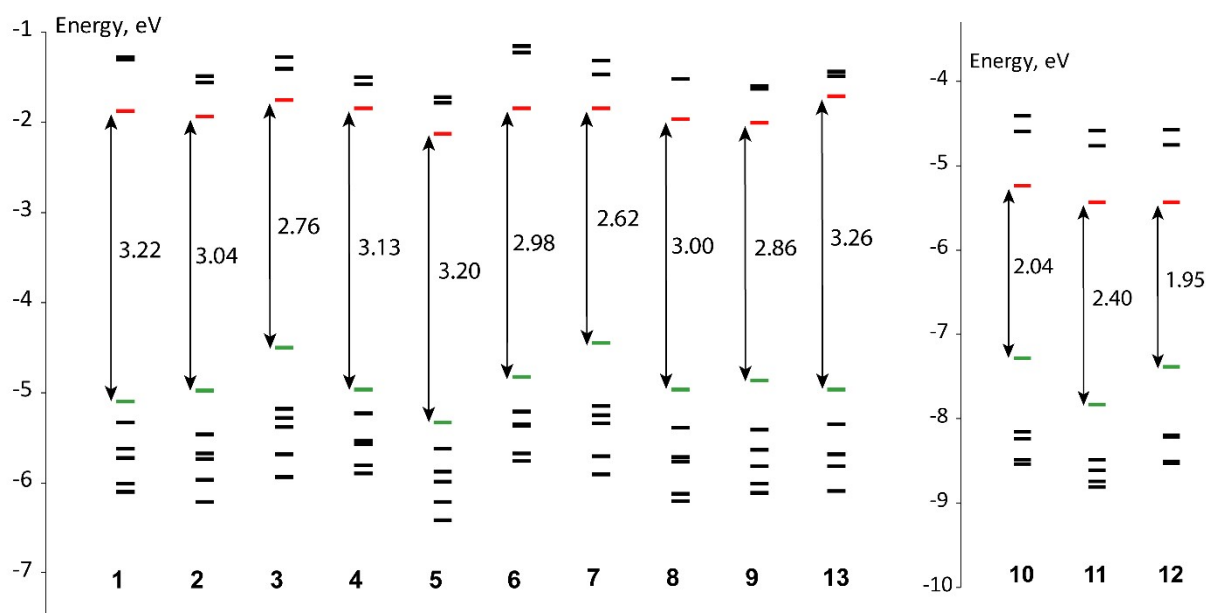

Figure S73. Energy of frontier molecular orbitals of complexes **1** – **9**, **13** (left) and **10** – **12** (right) and HOMO-LUMO gaps calculated by DFT (HOMO – highest occupied molecular orbital, LUMO – lowest unoccupied molecular orbital, DFT – Density Functional Theory).

Table S6. Composition of frontier molecular orbitals for **1 – 13**.

| complex |     | <b>1</b> | <b>2</b> | <b>3</b> | <b>4</b> | <b>5</b> | <b>6</b> | <b>7</b> | <b>8</b> | <b>9</b> | <b>10</b> | <b>11</b> | <b>12</b> | <b>13</b> |
|---------|-----|----------|----------|----------|----------|----------|----------|----------|----------|----------|-----------|-----------|-----------|-----------|
| HOMO-1  | Ir  | 0,46     | 0,50     | 0,51     | 0,42     | 0,42     | 0,36     | 0,57     | 0,52     | 0,13     | 0,35      | 0,14      | 0,01      | 0,17      |
|         | C^N | 0,22     | 0,19     | 0,23     | 0,27     | 0,14     | 0,51     | 0,32     | 0,23     | 0,84     | 0,51      | 0,86      | 0,79      | 0,04      |
|         | O^O | 0,32     | 0,31     | 0,26     | 0,30     | 0,44     | 0,13     | 0,11     | 0,25     | 0,03     | 0,17      | 0,00      | 0,20      | 0,79      |
| HOMO    | Ir  | 0,46     | 0,42     | 0,39     | 0,45     | 0,46     | 0,40     | 0,40     | 0,42     | 0,11     | 0,33      | 0,31      | 0,17      | 0,44      |
|         | C^N | 0,50     | 0,55     | 0,55     | 0,51     | 0,51     | 0,53     | 0,58     | 0,55     | 0,72     | 0,68      | 0,69      | 0,65      | 0,49      |
|         | O^O | 0,04     | 0,03     | 0,06     | 0,04     | 0,03     | 0,07     | 0,02     | 0,03     | 0,17     | 0,03      | 0,00      | 0,18      | 0,07      |
| LUMO    | Ir  | 0,01     | 0,01     | 0,01     | 0,01     | 0,02     | 0,01     | 0,02     | 0,02     | 0,02     | 0,02      | 0,03      | 0,03      | 0,01      |
|         | C^N | 0,01     | 0,11     | 0,02     | 0,02     | 0,04     | 0,46     | 0,15     | 0,01     | 0,90     | 0,63      | 0,09      | 0,63      | 0,06      |
|         | O^O | 0,98     | 0,88     | 0,97     | 0,97     | 0,94     | 0,53     | 0,84     | 0,97     | 0,08     | 0,35      | 0,88      | 0,34      | 0,93      |
| LUMO+1  | Ir  | 0,02     | 0,01     | 0,00     | 0,02     | 0,03     | 0,00     | 0,00     | 0,00     | 0,54     | 0,02      | 0,01      | 0,01      | 0,02      |
|         | C^N | 0,96     | 0,41     | 0,17     | 0,98     | 0,96     | 0,37     | 0,02     | 0,00     | 0,43     | 0,50      | 0,02      | 0,64      | 0,96      |
|         | O^O | 0,02     | 0,58     | 0,82     | 0,00     | 0,00     | 0,63     | 0,98     | 1        | 0,03     | 0,48      | 0,97      | 0,36      | 0,03      |

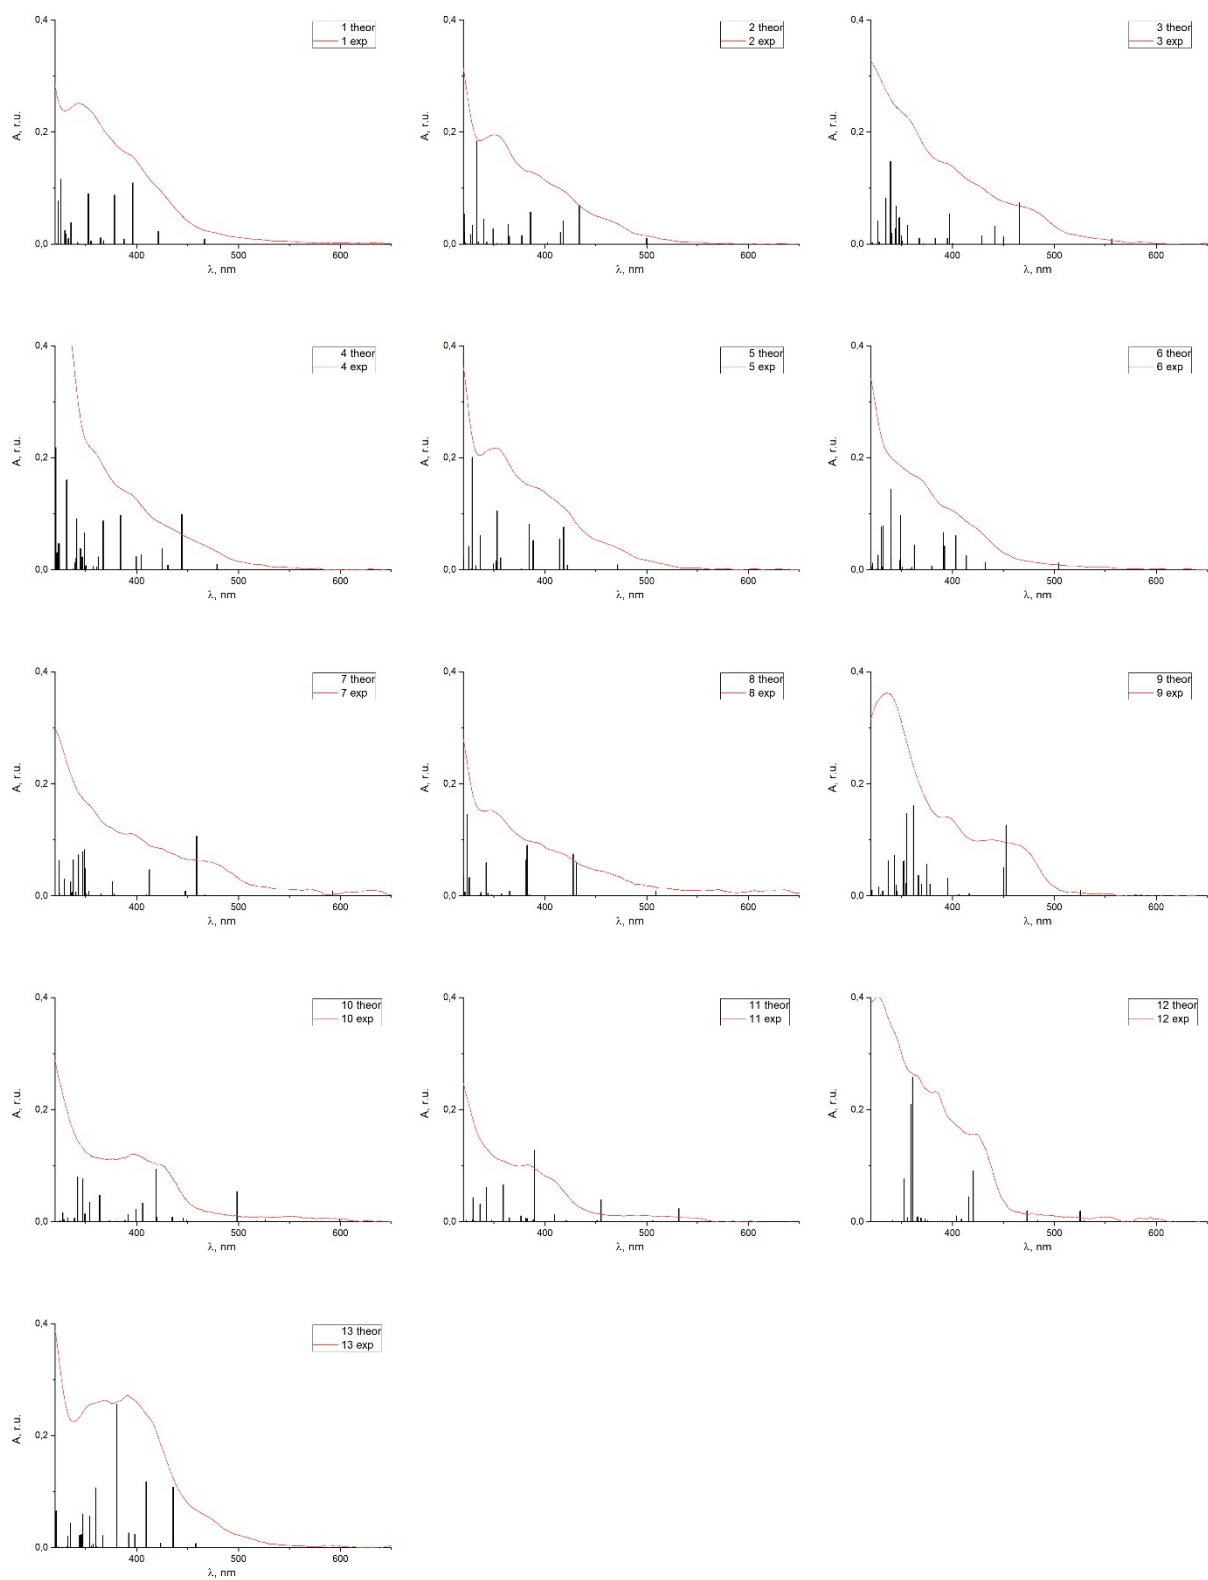

Figure S74. TDDFT (black) and experimental (red) electronic spectra of complexes **1** – **13**.

## 5. Photovoltaic measurements

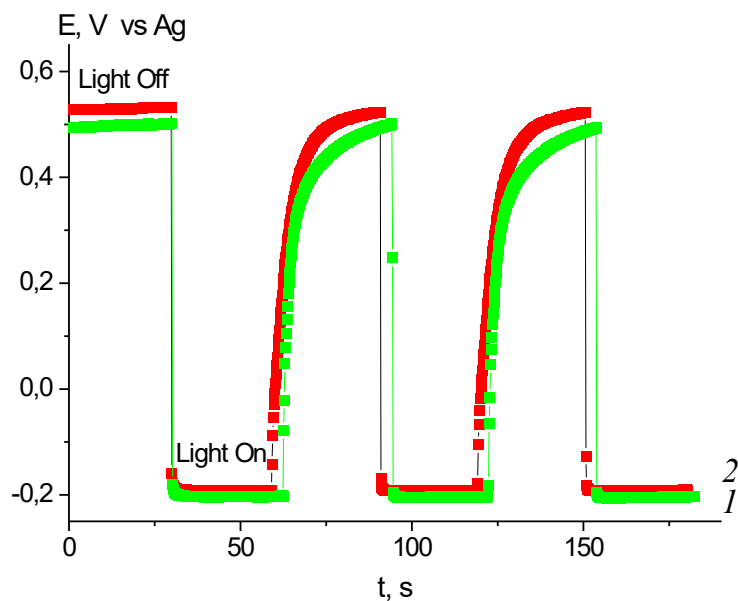

Figure S75. Time dependence of photopotential for  $\text{TiO}_2$  photoanodes sensitized by complexes **7H** (1) and **9H** (2) in the dark and on exposure to AM 1.5 G simulated solar light ( $100 \text{ mW cm}^{-2}$ ).

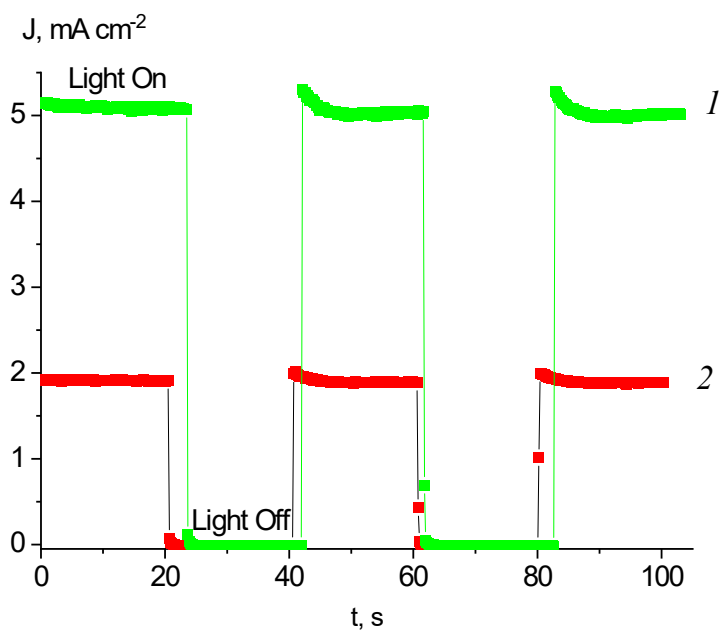

Figure S76. Time dependence of photocurrent at short-circuit for  $\text{TiO}_2$  photoanodes sensitized by complexes **7H** (1) and **9H** (2) in the dark, and on exposure to AM 1.5 G simulated solar light ( $100 \text{ mW cm}^{-2}$ ).
